# Supplementary material for: Analysis of immune characteristics and inflammatory mechanisms in COPD patients: a multi-layered study combining bulk and single-cell transcriptome analysis and machine learning
Source: Front Med (Lausanne). 2025 Jul 21;12:1592802. doi: 10.3389/fmed.2025.1592802 (PMC12318759; doi:10.3389/fmed.2025.1592802)
Supplement: Supplementary file 9 [file Table_9.xlsx]

## Sheet: c5.go.symbols_pathway_diff_anal
Pathway	t	pvalue	Sig
GOBP_MITOCHONDRIAL_GENOME_MAINTENANCE	-1.27584	0.217112	Not
GOBP_REPRODUCTION	-0.858803	0.401517	Not
GOBP_SINGLE_STRAND_BREAK_REPAIR	-0.522235	0.607518	Not
GOBP_REGULATION_OF_DNA_RECOMBINATION	-2.9361	0.00918425	Down
GOBP_REGULATION_OF_MITOTIC_RECOMBINATION	1.09134	0.295116	Not
GOBP_MITOTIC_SPINDLE_ELONGATION	-0.862009	0.404141	Not
GOBP_RIBOSOMAL_LARGE_SUBUNIT_ASSEMBLY	-1.18302	0.251227	Not
GOBP_RIBOSOMAL_SMALL_SUBUNIT_ASSEMBLY	-1.95449	0.0670262	Not
GOBP_VERY_LONG_CHAIN_FATTY_ACID_METABOLIC_PROCESS	0.638998	0.530738	Not
GOBP_TRANSITION_METAL_ION_TRANSPORT	1.22929	0.23341	Not
GOBP_UREA_CYCLE	0.589626	0.564216	Not
GOBP_CITRULLINE_METABOLIC_PROCESS	1.08312	0.295771	Not
GOBP_RIBOSOMAL_SUBUNIT_EXPORT_FROM_NUCLEUS	-0.785886	0.442728	Not
GOBP_RIBOSOMAL_LARGE_SUBUNIT_EXPORT_FROM_NUCLEUS	0.0151624	0.988047	Not
GOBP_RIBOSOMAL_SMALL_SUBUNIT_EXPORT_FROM_NUCLEUS	-1.0801	0.295978	Not
GOBP_CELL_CYCLE_CHECKPOINT_SIGNALING	-2.65117	0.0165315	Down
GOBP_DNA_REPLICATION_CHECKPOINT_SIGNALING	-2.56719	0.0179635	Down
GOBP_REGULATION_OF_TRANSCRIPTION_INVOLVED_IN_G1_S_TRANSITION_OF_MITOTIC_CELL_CYCLE	-0.0221789	0.982561	Not
GOBP_SULFUR_AMINO_ACID_METABOLIC_PROCESS	0.18658	0.85429	Not
GOBP_SULFUR_AMINO_ACID_BIOSYNTHETIC_PROCESS	-0.36436	0.72009	Not
GOBP_SULFUR_AMINO_ACID_CATABOLIC_PROCESS	1.64802	0.115992	Not
GOBP_SULFUR_AMINO_ACID_TRANSPORT	2.03485	0.057736	Not
GOBP_NEGATIVE_REGULATION_OF_TRANSCRIPTION_BY_RNA_POLYMERASE_II	1.39613	0.185985	Not
GOBP_RRNA_MODIFICATION	-0.487407	0.633088	Not
GOBP_MAPK_CASCADE	0.671968	0.509141	Not
GOBP_NUCLEAR_TRANSCRIBED_MRNA_CATABOLIC_PROCESS_NONSENSE_MEDIATED_DECAY	-1.72725	0.108538	Not
GOBP_PROTEIN_POLYUBIQUITINATION	-1.57949	0.1308	Not
GOBP_MEIOTIC_SPINDLE_ORGANIZATION	0.235389	0.817167	Not
GOBP_MICROTUBULE_CYTOSKELETON_ORGANIZATION	-0.736914	0.471435	Not
GOBP_SPLICEOSOMAL_TRI_SNRNP_COMPLEX_ASSEMBLY	0.914872	0.375601	Not
GOBP_SPLICEOSOMAL_COMPLEX_ASSEMBLY	-1.48263	0.154003	Not
GOBP_ALLANTOIN_METABOLIC_PROCESS	-0.323384	0.749609	Not
GOBP_MITOCHONDRIAL_FISSION	-1.87055	0.082165	Not
GOBP_PEPTIDOGLYCAN_METABOLIC_PROCESS	0.552368	0.586528	Not
GOBP_POLYSACCHARIDE_BIOSYNTHETIC_PROCESS	-0.115702	0.909258	Not
GOBP_POLYSACCHARIDE_CATABOLIC_PROCESS	0.209229	0.837243	Not
GOBP_MITOTIC_CELL_CYCLE	-2.15609	0.050921	Not
GOBP_MITOTIC_CYTOKINESIS	-1.91038	0.0770359	Not
GOBP_NUCLEAR_TRANSCRIBED_MRNA_CATABOLIC_PROCESS_DEADENYLATION_DEPENDENT_DECAY	-1.52221	0.149918	Not
GOBP_NUCLEAR_TRANSCRIBED_MRNA_POLY_A_TAIL_SHORTENING	-1.0488	0.308704	Not
GOBP_DEADENYLATION_DEPENDENT_DECAPPING_OF_NUCLEAR_TRANSCRIBED_MRNA	-1.84939	0.0785755	Not
GOBP_NUCLEAR_TRANSCRIBED_MRNA_CATABOLIC_PROCESS_EXONUCLEOLYTIC	-2.28536	0.0347941	Down
GOBP_RETROGRADE_TRANSPORT_VESICLE_RECYCLING_WITHIN_GOLGI	-0.137678	0.89223	Not
GOBP_RESPONSE_TO_REACTIVE_OXYGEN_SPECIES	0.421834	0.678137	Not
GOBP_RESPONSE_TO_OXYGEN_RADICAL	-0.0810699	0.936355	Not
GOBP_PROTEIN_DENEDDYLATION	-2.68555	0.0142775	Down
GOBP_RNA_SPLICING_VIA_TRANSESTERIFICATION_REACTIONS	-1.15063	0.264156	Not
GOBP_ALTERNATIVE_MRNA_SPLICING_VIA_SPLICEOSOME	0.565794	0.577765	Not
GOBP_REGULATION_OF_ALTERNATIVE_MRNA_SPLICING_VIA_SPLICEOSOME	0.666992	0.512113	Not
GOBP_SPLICEOSOMAL_SNRNP_ASSEMBLY	-1.41183	0.178818	Not
GOBP_MRNA_3_SPLICE_SITE_RECOGNITION	2.18901	0.0442632	Up
GOBP_SPLICEOSOMAL_CONFORMATIONAL_CHANGES_TO_GENERATE_CATALYTIC_CONFORMATION	1.2734	0.222264	Not
GOBP_RNA_SPLICING_VIA_ENDONUCLEOLYTIC_CLEAVAGE_AND_LIGATION	-0.731454	0.473842	Not
GOBP_MRNA_5_SPLICE_SITE_RECOGNITION	-1.32132	0.201116	Not
GOBP_PROTEIN_PEPTIDYL_PROLYL_ISOMERIZATION	-1.23184	0.231684	Not
GOBP_REGULATION_OF_HISTONE_H3_K36_METHYLATION	-0.154575	0.878794	Not
GOBP_AUTOPHAGY_OF_MITOCHONDRION	0.0113316	0.99108	Not
GOBP_MITOPHAGY	1.16257	0.261115	Not
GOBP_ENDONUCLEOLYTIC_CLEAVAGE_IN_ITS1_TO_SEPARATE_SSU_RRNA_FROM_5_8S_RRNA_AND_LSU_RRNA_FROM_TRICISTRONIC_RRNA_TRANSCRIPT_SSU_RRNA_5_8S_RRNA_LSU_RRNA	0.3237	0.749748	Not
GOBP_ENZYME_DIRECTED_RRNA_PSEUDOURIDINE_SYNTHESIS	-0.811409	0.428463	Not
GOBP_MATURATION_OF_5_8S_RRNA	-0.26211	0.796348	Not
GOBP_MATURATION_OF_SSU_RRNA_FROM_TRICISTRONIC_RRNA_TRANSCRIPT_SSU_RRNA_5_8S_RRNA_LSU_RRNA	-1.02935	0.317347	Not
GOBP_MATURATION_OF_LSU_RRNA_FROM_TRICISTRONIC_RRNA_TRANSCRIPT_SSU_RRNA_5_8S_RRNA_LSU_RRNA	-0.724045	0.478067	Not
GOBP_MATURATION_OF_5_8S_RRNA_FROM_TRICISTRONIC_RRNA_TRANSCRIPT_SSU_RRNA_5_8S_RRNA_LSU_RRNA	0.182703	0.857168	Not
GOBP_CLEAVAGE_INVOLVED_IN_RRNA_PROCESSING	0.0922786	0.927496	Not
GOBP_MATURATION_OF_LSU_RRNA	-0.79368	0.43741	Not
GOBP_ENDONUCLEOLYTIC_CLEAVAGE_INVOLVED_IN_RRNA_PROCESSING	0.852323	0.405105	Not
GOBP_ENDONUCLEOLYTIC_CLEAVAGE_IN_5_ETS_OF_TRICISTRONIC_RRNA_TRANSCRIPT_SSU_RRNA_5_8S_RRNA_LSU_RRNA	0.559382	0.582245	Not
GOBP_SMALL_NUCLEOLAR_RIBONUCLEOPROTEIN_COMPLEX_ASSEMBLY	-1.76848	0.0922944	Not
GOBP_BOX_C_D_SNORNP_ASSEMBLY	-3.02453	0.00690624	Down
GOBP_EMBRYONIC_AXIS_SPECIFICATION	1.50232	0.149868	Not
GOBP_RESOLUTION_OF_MEIOTIC_RECOMBINATION_INTERMEDIATES	-1.1262	0.274128	Not
GOBP_TELOMERE_MAINTENANCE_VIA_RECOMBINATION	-2.82767	0.0103173	Down
GOBP_TELOMERE_MAINTENANCE	-1.74978	0.0963105	Not
GOBP_RECOMBINATIONAL_REPAIR	-1.48392	0.153093	Not
GOBP_DOUBLE_STRAND_BREAK_REPAIR_VIA_BREAK_INDUCED_REPLICATION	0.275738	0.786945	Not
GOBP_DNA_DOUBLE_STRAND_BREAK_PROCESSING	-1.84693	0.0868802	Not
GOBP_DNA_SYNTHESIS_INVOLVED_IN_DNA_REPAIR	-0.84284	0.40884	Not
GOBP_DNA_CATABOLIC_PROCESS_ENDONUCLEOLYTIC	1.19486	0.254082	Not
GOBP_DNA_CATABOLIC_PROCESS_EXONUCLEOLYTIC	-0.404637	0.69227	Not
GOBP_SISTER_CHROMATID_SEGREGATION	-2.65804	0.0190627	Down
GOBP_REGULATION_OF_GLUTAMINE_FAMILY_AMINO_ACID_METABOLIC_PROCESS	1.37069	0.186784	Not
GOBP_CELL_MORPHOGENESIS	2.32627	0.0336075	Up
GOBP_CELL_MORPHOGENESIS_INVOLVED_IN_DIFFERENTIATION	2.86165	0.0119507	Up
GOBP_CYTOKINESIS	-0.995928	0.33413	Not
GOBP_NUCLEAR_TRANSCRIBED_MRNA_CATABOLIC_PROCESS	-0.970395	0.347412	Not
GOBP_MITOCHONDRIAL_RNA_CATABOLIC_PROCESS	-2.38865	0.0282141	Down
GOBP_MITOCHONDRIAL_RNA_METABOLIC_PROCESS	-1.40459	0.17555	Not
GOBP_REGULATION_OF_MITOCHONDRIAL_RNA_CATABOLIC_PROCESS	-3.04472	0.00722049	Down
GOBP_MITOCHONDRIAL_RNA_PROCESSING	-1.08432	0.290708	Not
GOBP_MITOCHONDRIAL_RNA_3_END_PROCESSING	-4.62162	0.000166099	Down
GOBP_RNA_5_END_PROCESSING	-1.28727	0.214999	Not
GOBP_RRNA_5_END_PROCESSING	0.649656	0.524116	Not
GOBP_TRANSCRIPTION_DEPENDENT_TETHERING_OF_RNA_POLYMERASE_II_GENE_DNA_AT_NUCLEAR_PERIPHERY	-0.360773	0.722582	Not
GOBP_RESPONSE_TO_ACID_CHEMICAL	1.21744	0.242551	Not
GOBP_RNA_POLYMERASE_I_PREINITIATION_COMPLEX_ASSEMBLY	1.84248	0.0798965	Not
GOBP_FORMATION_OF_EXTRACHROMOSOMAL_CIRCULAR_DNA	0.372454	0.714184	Not
GOBP_GUANINE_NUCLEOTIDE_TRANSPORT	2.45845	0.0238281	Up
GOBP_SKELETAL_SYSTEM_DEVELOPMENT	2.58956	0.0227698	Up
GOBP_OSSIFICATION	1.06335	0.300137	Not
GOBP_NEUROTRANSMITTER_UPTAKE	-0.360056	0.722919	Not
GOBP_REGULATION_OF_NEUROTRANSMITTER_LEVELS	0.439642	0.664817	Not
GOBP_ACTION_POTENTIAL	2.17495	0.0440635	Up
GOBP_RNA_METHYLATION	-0.521512	0.609688	Not
GOBP_PSEUDOURIDINE_SYNTHESIS	-0.919064	0.368524	Not
GOBP_CILIUM_OR_FLAGELLUM_DEPENDENT_CELL_MOTILITY	-0.104695	0.917612	Not
GOBP_OVARIAN_FOLLICLE_DEVELOPMENT	0.729864	0.479914	Not
GOBP_OVULATION_FROM_OVARIAN_FOLLICLE	-0.336113	0.740787	Not
GOBP_ANTRAL_OVARIAN_FOLLICLE_GROWTH	1.04162	0.31648	Not
GOBP_LUTEINIZATION	1.29275	0.211015	Not
GOBP_LUTEOLYSIS	-1.48811	0.158153	Not
GOBP_OOCYTE_MATURATION	2.34109	0.0300478	Up
GOBP_FATTY_ACID_ALPHA_OXIDATION	-0.642017	0.529834	Not
GOBP_RESPONSE_TO_PROTOZOAN	-1.80893	0.0869164	Not
GOBP_BRANCHING_INVOLVED_IN_BLOOD_VESSEL_MORPHOGENESIS	1.45196	0.162621	Not
GOBP_VASCULOGENESIS	2.26469	0.0346532	Up
GOBP_GANGLIOSIDE_METABOLIC_PROCESS	1.99037	0.0638788	Not
GOBP_GANGLIOSIDE_BIOSYNTHETIC_PROCESS	1.3264	0.201683	Not
GOBP_MICROTUBULE_BUNDLE_FORMATION	0.575889	0.571368	Not
GOBP_OSTEOBLAST_DIFFERENTIATION	1.17499	0.25577	Not
GOBP_UROGENITAL_SYSTEM_DEVELOPMENT	3.3845	0.00301819	Up
GOBP_METANEPHROS_DEVELOPMENT	2.48849	0.021594	Up
GOBP_TEMPERATURE_HOMEOSTASIS	0.937931	0.358958	Not
GOBP_FEVER_GENERATION	-1.06314	0.299812	Not
GOBP_AMEBOIDAL_TYPE_CELL_MIGRATION	1.48351	0.154784	Not
GOBP_ACROSOME_ASSEMBLY	0.0705915	0.944391	Not
GOBP_LONG_CHAIN_FATTY_ACID_METABOLIC_PROCESS	3.20128	0.0042918	Up
GOBP_CELLULAR_GLUCOSE_HOMEOSTASIS	2.31963	0.0317654	Up
GOBP_TRNA_5_LEADER_REMOVAL	-1.75683	0.0947911	Not
GOBP_HISTAMINE_METABOLIC_PROCESS	1.49078	0.1552	Not
GOBP_GASTRIC_ACID_SECRETION	-0.614337	0.547691	Not
GOBP_IN_UTERO_EMBRYONIC_DEVELOPMENT	1.19105	0.247683	Not
GOBP_GASTRULATION_WITH_MOUTH_FORMING_SECOND	1.01638	0.321325	Not
GOBP_FORMATION_OF_PRIMARY_GERM_LAYER	1.19539	0.251516	Not
GOBP_ENDODERM_FORMATION	-0.156045	0.878061	Not
GOBP_CELL_FATE_SPECIFICATION	3.58907	0.00229419	Up
GOBP_CELL_FATE_DETERMINATION	1.98191	0.0666791	Not
GOBP_MESODERMAL_CELL_FATE_COMMITMENT	0.371463	0.714421	Not
GOBP_ENDODERMAL_CELL_FATE_COMMITMENT	-0.455952	0.653422	Not
GOBP_ENDODERMAL_CELL_FATE_SPECIFICATION	-0.32135	0.751582	Not
GOBP_FORMATION_OF_TRANSLATION_PREINITIATION_COMPLEX	-1.48582	0.152265	Not
GOBP_FORMATION_OF_CYTOPLASMIC_TRANSLATION_INITIATION_COMPLEX	-0.945532	0.355303	Not
GOBP_MORPHOGENESIS_OF_A_POLARIZED_EPITHELIUM	1.99956	0.0589209	Not
GOBP_EYE_PHOTORECEPTOR_CELL_DIFFERENTIATION	0.520957	0.611578	Not
GOBP_SOMITOGENESIS	2.11847	0.04895	Up
GOBP_SOMITE_SPECIFICATION	0.264858	0.793733	Not
GOBP_ORGAN_INDUCTION	0.947122	0.355813	Not
GOBP_MORPHOGENESIS_OF_A_BRANCHING_STRUCTURE	2.75775	0.0120493	Up
GOBP_NEURON_MIGRATION	2.06476	0.0617345	Not
GOBP_MEMBRANE_RAFT_ASSEMBLY	-0.0851247	0.93312	Not
GOBP_ESTABLISHMENT_OF_LYMPHOCYTE_POLARITY	0.230048	0.82042	Not
GOBP_IMMUNOLOGICAL_SYNAPSE_FORMATION	1.03581	0.31238	Not
GOBP_MYELOID_DENDRITIC_CELL_ACTIVATION	-0.0628216	0.950511	Not
GOBP_CELL_ACTIVATION	-0.261619	0.796733	Not
GOBP_LEUKOCYTE_HOMEOSTASIS	-1.9088	0.0719711	Not
GOBP_PLASMA_MEMBRANE_REPAIR	-0.773444	0.449587	Not
GOBP_NATURAL_KILLER_CELL_DIFFERENTIATION	-0.193179	0.848678	Not
GOBP_NEUTROPHIL_HOMEOSTASIS	-1.14103	0.269424	Not
GOBP_NEUTROPHIL_APOPTOTIC_PROCESS	-1.20362	0.250149	Not
GOBP_B_CELL_HOMEOSTASIS	-1.71754	0.102792	Not
GOBP_B_CELL_APOPTOTIC_PROCESS	-0.496932	0.624943	Not
GOBP_NATURAL_KILLER_CELL_PROLIFERATION	2.01677	0.0570905	Not
GOBP_ANTIBODY_DEPENDENT_CELLULAR_CYTOTOXICITY	-0.270201	0.790063	Not
GOBP_CYTOKINE_PRODUCTION	-0.187412	0.85338	Not
GOBP_NEGATIVE_REGULATION_OF_CYTOKINE_PRODUCTION	-0.12854	0.898978	Not
GOBP_POSITIVE_REGULATION_OF_CYTOKINE_PRODUCTION	-0.66961	0.511283	Not
GOBP_SEROTONIN_SECRETION	3.9329	0.000805346	Up
GOBP_HISTAMINE_SECRETION	-2.50711	0.0206475	Down
GOBP_MESONEPHROS_DEVELOPMENT	2.82839	0.0103715	Up
GOBP_BLASTOCYST_DEVELOPMENT	-0.175123	0.862784	Not
GOBP_BLASTOCYST_FORMATION	0.728092	0.476026	Not
GOBP_INNER_CELL_MASS_CELL_DIFFERENTIATION	2.74148	0.0139509	Up
GOBP_TROPHECTODERMAL_CELL_DIFFERENTIATION	-0.167288	0.868759	Not
GOBP_BLASTOCYST_GROWTH	-1.07887	0.298583	Not
GOBP_INNER_CELL_MASS_CELL_PROLIFERATION	-2.41746	0.0270737	Down
GOBP_RELEASE_OF_CYTOCHROME_C_FROM_MITOCHONDRIA	-1.59826	0.132954	Not
GOBP_EPITHELIAL_TO_MESENCHYMAL_TRANSITION	2.69211	0.0140732	Up
GOBP_NEURAL_PLATE_MORPHOGENESIS	0.507308	0.619729	Not
GOBP_NEURAL_PLATE_DEVELOPMENT	1.35816	0.193579	Not
GOBP_NEURAL_TUBE_FORMATION	3.16647	0.00563278	Up
GOBP_NEURAL_FOLD_FORMATION	0.185471	0.855025	Not
GOBP_PROTEIN_INSERTION_INTO_MITOCHONDRIAL_MEMBRANE_INVOLVED_IN_APOPTOTIC_SIGNALING_PATHWAY	-0.0842781	0.933814	Not
GOBP_PHAGOLYSOSOME_ASSEMBLY	-1.74988	0.0948019	Not
GOBP_NK_T_CELL_DIFFERENTIATION	-0.717579	0.482502	Not
GOBP_NK_T_CELL_PROLIFERATION	1.09675	0.285635	Not
GOBP_COMPLEMENT_ACTIVATION_LECTIN_PATHWAY	0.162342	0.872824	Not
GOBP_RESPONSE_TO_YEAST	-0.345815	0.733463	Not
GOBP_RECEPTOR_RECYCLING	1.07286	0.298953	Not
GOBP_ENDOTHELIAL_CELL_DEVELOPMENT	1.11388	0.278964	Not
GOBP_ENDOTHELIAL_CELL_MORPHOGENESIS	1.92959	0.0672954	Not
GOBP_PLACENTA_DEVELOPMENT	-0.229606	0.821451	Not
GOBP_EMBRYONIC_PLACENTA_DEVELOPMENT	-0.229941	0.820938	Not
GOBP_MATERNAL_PLACENTA_DEVELOPMENT	-1.31209	0.204074	Not
GOBP_TISSUE_HOMEOSTASIS	1.49743	0.14978	Not
GOBP_RETINA_HOMEOSTASIS	0.391878	0.700503	Not
GOBP_CELL_KILLING	0.0849284	0.933156	Not
GOBP_LEUKOCYTE_MEDIATED_CYTOTOXICITY	0.0545587	0.957013	Not
GOBP_REGULATION_OF_LEUKOCYTE_MEDIATED_CYTOTOXICITY	0.0769152	0.939534	Not
GOBP_T_CELL_MEDIATED_CYTOTOXICITY	0.115319	0.909291	Not
GOBP_REGULATION_OF_T_CELL_MEDIATED_CYTOTOXICITY	-0.284181	0.779061	Not
GOBP_NEGATIVE_REGULATION_OF_T_CELL_MEDIATED_CYTOTOXICITY	-1.65062	0.116183	Not
GOBP_POSITIVE_REGULATION_OF_T_CELL_MEDIATED_CYTOTOXICITY	0.305851	0.762982	Not
GOBP_REGULATION_OF_RECEPTOR_RECYCLING	0.85087	0.407331	Not
GOBP_NEGATIVE_REGULATION_OF_RECEPTOR_RECYCLING	0.685624	0.50268	Not
GOBP_POSITIVE_REGULATION_OF_RECEPTOR_RECYCLING	0.578469	0.571431	Not
GOBP_B_1_B_CELL_DIFFERENTIATION	0.0509168	0.959965	Not
GOBP_REGULATION_OF_PROTEIN_PHOSPHORYLATION	0.301575	0.766013	Not
GOBP_ENDOTHELIAL_CELL_PROLIFERATION	-0.318894	0.75296	Not
GOBP_NEGATIVE_REGULATION_OF_ENDOTHELIAL_CELL_PROLIFERATION	-0.460575	0.649838	Not
GOBP_POSITIVE_REGULATION_OF_ENDOTHELIAL_CELL_PROLIFERATION	1.06496	0.299234	Not
GOBP_POSTSYNAPTIC_MEMBRANE_ORGANIZATION	-0.0657603	0.948266	Not
GOBP_VASCULATURE_DEVELOPMENT	2.3327	0.0296933	Up
GOBP_LYMPH_VESSEL_DEVELOPMENT	1.77592	0.0911349	Not
GOBP_LYMPHANGIOGENESIS	0.43212	0.670953	Not
GOBP_REGULATION_OF_CELL_MATRIX_ADHESION	1.46537	0.157632	Not
GOBP_NEGATIVE_REGULATION_OF_CELL_MATRIX_ADHESION	-1.31193	0.209807	Not
GOBP_POSITIVE_REGULATION_OF_CELL_MATRIX_ADHESION	3.09885	0.00578165	Up
GOBP_BLOOD_VESSEL_MATURATION	2.02486	0.0606725	Not
GOBP_POSITIVE_REGULATION_OF_NEUROTRANSMITTER_SECRETION	2.58505	0.0197048	Up
GOBP_SYNAPTIC_TRANSMISSION_DOPAMINERGIC	1.47387	0.155697	Not
GOBP_STARTLE_RESPONSE	-0.317422	0.75471	Not
GOBP_SUCKLING_BEHAVIOR	-0.666859	0.512998	Not
GOBP_BLOOD_VESSEL_REMODELING	1.31909	0.203098	Not
GOBP_RESPONSE_TO_AMPHETAMINE	-0.815898	0.426804	Not
GOBP_NERVOUS_SYSTEM_PROCESS_INVOLVED_IN_REGULATION_OF_SYSTEMIC_ARTERIAL_BLOOD_PRESSURE	2.47543	0.0219478	Up
GOBP_RENAL_SYSTEM_PROCESS_INVOLVED_IN_REGULATION_OF_BLOOD_VOLUME	0.0279164	0.978056	Not
GOBP_REGULATION_OF_SYSTEMIC_ARTERIAL_BLOOD_PRESSURE_BY_HORMONE	0.967629	0.345883	Not
GOBP_REGULATION_OF_SYSTEMIC_ARTERIAL_BLOOD_PRESSURE_BY_CIRCULATORY_RENIN_ANGIOTENSIN	1.14413	0.267869	Not
GOBP_REGULATION_OF_SYSTEMIC_ARTERIAL_BLOOD_PRESSURE_BY_VASOPRESSIN	0.977152	0.34297	Not
GOBP_REGULATION_OF_SYSTEMIC_ARTERIAL_BLOOD_PRESSURE_BY_NOREPINEPHRINE_EPINEPHRINE	0.558036	0.582787	Not
GOBP_RENIN_SECRETION_INTO_BLOOD_STREAM	1.18314	0.251338	Not
GOBP_REGULATION_OF_ANGIOTENSIN_LEVELS_IN_BLOOD	0.0405909	0.968078	Not
GOBP_MORPHOGENESIS_OF_AN_EPITHELIUM	2.70985	0.0158769	Up
GOBP_MORPHOGENESIS_OF_AN_EPITHELIAL_SHEET	0.629604	0.536546	Not
GOBP_REGULATION_OF_BLOOD_VOLUME_BY_RENIN_ANGIOTENSIN	0.112465	0.911651	Not
GOBP_RESPONSE_TO_DIETARY_EXCESS	2.78105	0.0112365	Up
GOBP_REDUCTION_OF_FOOD_INTAKE_IN_RESPONSE_TO_DIETARY_EXCESS	0.143649	0.887644	Not
GOBP_DIET_INDUCED_THERMOGENESIS	0.786597	0.442616	Not
GOBP_REGULATION_OF_THE_FORCE_OF_HEART_CONTRACTION	2.78881	0.013235	Up
GOBP_REGULATION_OF_HEART_RATE	1.94108	0.0660029	Not
GOBP_REGULATION_OF_SODIUM_ION_TRANSPORT	3.01077	0.00691687	Up
GOBP_G_PROTEIN_COUPLED_RECEPTOR_INTERNALIZATION	0.796122	0.436334	Not
GOBP_BRAIN_RENIN_ANGIOTENSIN_SYSTEM	0.642786	0.529871	Not
GOBP_REGULATION_OF_L_GLUTAMATE_IMPORT_ACROSS_PLASMA_MEMBRANE	-1.77563	0.0920063	Not
GOBP_SPROUTING_ANGIOGENESIS	0.646399	0.526311	Not
GOBP_CELL_MIGRATION_INVOLVED_IN_SPROUTING_ANGIOGENESIS	-0.611966	0.548022	Not
GOBP_BLOOD_VESSEL_ENDOTHELIAL_CELL_PROLIFERATION_INVOLVED_IN_SPROUTING_ANGIOGENESIS	0.0280362	0.978001	Not
GOBP_POSITIVE_REGULATION_OF_NEUROBLAST_PROLIFERATION	-0.442781	0.665208	Not
GOBP_POSITIVE_REGULATION_OF_MESENCHYMAL_CELL_PROLIFERATION	2.85461	0.00970242	Up
GOBP_CHONDROCYTE_DIFFERENTIATION	1.0068	0.327869	Not
GOBP_CHONDROCYTE_DEVELOPMENT	1.23836	0.230061	Not
GOBP_EPITHELIAL_CELL_DEVELOPMENT	2.47561	0.0237397	Up
GOBP_COLUMNAR_CUBOIDAL_EPITHELIAL_CELL_DIFFERENTIATION	3.15038	0.00672847	Up
GOBP_COLUMNAR_CUBOIDAL_EPITHELIAL_CELL_DEVELOPMENT	1.56691	0.133443	Not
GOBP_GLANDULAR_EPITHELIAL_CELL_DIFFERENTIATION	3.39478	0.00286083	Up
GOBP_GLANDULAR_EPITHELIAL_CELL_DEVELOPMENT	1.75498	0.0947681	Not
GOBP_COLUMNAR_CUBOIDAL_EPITHELIAL_CELL_MATURATION	1.01533	0.3224	Not
GOBP_EPITHELIAL_CELL_MATURATION	2.51521	0.0262743	Up
GOBP_GLANDULAR_EPITHELIAL_CELL_MATURATION	0.908909	0.374194	Not
GOBP_OPTIC_CUP_MORPHOGENESIS_INVOLVED_IN_CAMERA_TYPE_EYE_DEVELOPMENT	2.02048	0.0623251	Not
GOBP_OSTEOBLAST_DEVELOPMENT	1.15534	0.267377	Not
GOBP_REGULATION_OF_OXIDATIVE_PHOSPHORYLATION	-0.332007	0.745538	Not
GOBP_PROTEIN_DEPALMITOYLATION	-2.18716	0.0435772	Down
GOBP_INHIBITION_OF_NEUROEPITHELIAL_CELL_DIFFERENTIATION	1.08709	0.289757	Not
GOBP_REGULATION_OF_RESPIRATORY_GASEOUS_EXCHANGE_BY_NERVOUS_SYSTEM_PROCESS	2.02688	0.0657841	Not
GOBP_LENS_DEVELOPMENT_IN_CAMERA_TYPE_EYE	1.73998	0.0976731	Not
GOBP_LENS_MORPHOGENESIS_IN_CAMERA_TYPE_EYE	1.67896	0.108678	Not
GOBP_REGULATION_OF_RECEPTOR_INTERNALIZATION	1.54735	0.136748	Not
GOBP_NEGATIVE_REGULATION_OF_RECEPTOR_INTERNALIZATION	0.542088	0.596807	Not
GOBP_POSITIVE_REGULATION_OF_RECEPTOR_INTERNALIZATION	1.54667	0.138115	Not
GOBP_AUDITORY_RECEPTOR_CELL_MORPHOGENESIS	-1.30539	0.206332	Not
GOBP_TRNA_WOBBLE_BASE_MODIFICATION	-2.03383	0.0609558	Not
GOBP_STORE_OPERATED_CALCIUM_ENTRY	2.30192	0.0352443	Up
GOBP_AGGRESSIVE_BEHAVIOR	-0.97708	0.347161	Not
GOBP_THYROID_HORMONE_MEDIATED_SIGNALING_PATHWAY	1.77701	0.0931858	Not
GOBP_OSTEOCLAST_PROLIFERATION	-0.169414	0.867886	Not
GOBP_CYTOPLASMIC_TRANSLATION	-2.90218	0.00852251	Down
GOBP_CYTOPLASMIC_TRANSLATIONAL_ELONGATION	-2.44671	0.0243783	Down
GOBP_CYTOPLASMIC_TRANSLATIONAL_INITIATION	-1.70353	0.103658	Not
GOBP_CAP_DEPENDENT_TRANSLATIONAL_INITIATION	-1.95495	0.0648078	Not
GOBP_SOMATIC_DIVERSIFICATION_OF_IMMUNE_RECEPTORS	-2.20277	0.0391439	Down
GOBP_SOMATIC_DIVERSIFICATION_OF_IMMUNOGLOBULINS_INVOLVED_IN_IMMUNE_RESPONSE	-2.63605	0.0156125	Down
GOBP_BEHAVIORAL_DEFENSE_RESPONSE	0.465582	0.646377	Not
GOBP_ACTIVATION_OF_INNATE_IMMUNE_RESPONSE	-0.644875	0.526068	Not
GOBP_PATTERN_RECOGNITION_RECEPTOR_SIGNALING_PATHWAY	-0.903949	0.376443	Not
GOBP_TOLL_LIKE_RECEPTOR_SIGNALING_PATHWAY	-1.11604	0.277154	Not
GOBP_INNATE_IMMUNE_RESPONSE_IN_MUCOSA	-0.735712	0.470678	Not
GOBP_NATURAL_KILLER_CELL_MEDIATED_IMMUNITY	0.665471	0.513275	Not
GOBP_POSITIVE_REGULATION_OF_DEFENSE_RESPONSE_TO_VIRUS_BY_HOST	-0.0142044	0.988853	Not
GOBP_LEUKOCYTE_CHEMOTAXIS_INVOLVED_IN_INFLAMMATORY_RESPONSE	-1.58396	0.128249	Not
GOBP_RESPONSE_TO_MOLECULE_OF_BACTERIAL_ORIGIN	-1.67999	0.108302	Not
GOBP_RESPONSE_TO_MOLECULE_OF_FUNGAL_ORIGIN	0.140358	0.889913	Not
GOBP_HEMATOPOIETIC_PROGENITOR_CELL_DIFFERENTIATION	0.749943	0.46255	Not
GOBP_WOUND_HEALING_INVOLVED_IN_INFLAMMATORY_RESPONSE	-1.13247	0.270676	Not
GOBP_CONNECTIVE_TISSUE_REPLACEMENT_INVOLVED_IN_INFLAMMATORY_RESPONSE_WOUND_HEALING	-0.286729	0.777613	Not
GOBP_LYMPHOCYTE_ANERGY	-0.0326715	0.974308	Not
GOBP_ADAPTIVE_IMMUNE_RESPONSE	-0.357938	0.725008	Not
GOBP_ORGAN_OR_TISSUE_SPECIFIC_IMMUNE_RESPONSE	1.28804	0.211833	Not
GOBP_IMMUNE_EFFECTOR_PROCESS	-0.515965	0.612918	Not
GOBP_ACTIVATION_OF_IMMUNE_RESPONSE	-0.67667	0.507611	Not
GOBP_LYMPHOCYTE_HOMEOSTASIS	-1.67719	0.110319	Not
GOBP_MYELOID_CELL_HOMEOSTASIS	0.617417	0.543606	Not
GOBP_CELL_ACTIVATION_INVOLVED_IN_IMMUNE_RESPONSE	-0.814006	0.428171	Not
GOBP_LEUKOCYTE_ACTIVATION_INVOLVED_IN_INFLAMMATORY_RESPONSE	0.31735	0.754506	Not
GOBP_MYELOID_LEUKOCYTE_ACTIVATION	-1.05741	0.305253	Not
GOBP_MYELOID_CELL_ACTIVATION_INVOLVED_IN_IMMUNE_RESPONSE	-1.37074	0.189691	Not
GOBP_MACROPHAGE_ACTIVATION_INVOLVED_IN_IMMUNE_RESPONSE	-1.20051	0.243385	Not
GOBP_MICROGLIAL_CELL_ACTIVATION_INVOLVED_IN_IMMUNE_RESPONSE	-0.543345	0.592772	Not
GOBP_NEUTROPHIL_ACTIVATION_INVOLVED_IN_IMMUNE_RESPONSE	-0.486783	0.631455	Not
GOBP_LYMPHOCYTE_ACTIVATION_INVOLVED_IN_IMMUNE_RESPONSE	-0.270238	0.790539	Not
GOBP_T_CELL_ACTIVATION_INVOLVED_IN_IMMUNE_RESPONSE	0.299019	0.768414	Not
GOBP_T_CELL_ACTIVATION_VIA_T_CELL_RECEPTOR_CONTACT_WITH_ANTIGEN_BOUND_TO_MHC_MOLECULE_ON_ANTIGEN_PRESENTING_CELL	0.290816	0.774122	Not
GOBP_T_CELL_DIFFERENTIATION_INVOLVED_IN_IMMUNE_RESPONSE	0.637376	0.530858	Not
GOBP_T_HELPER_CELL_LINEAGE_COMMITMENT	2.02072	0.0583823	Not
GOBP_T_CELL_PROLIFERATION_INVOLVED_IN_IMMUNE_RESPONSE	-2.24531	0.036583	Down
GOBP_B_CELL_ACTIVATION_INVOLVED_IN_IMMUNE_RESPONSE	-2.028	0.0573259	Not
GOBP_MATURE_B_CELL_DIFFERENTIATION_INVOLVED_IN_IMMUNE_RESPONSE	0.160799	0.87383	Not
GOBP_GERMINAL_CENTER_B_CELL_DIFFERENTIATION	1.06933	0.298142	Not
GOBP_MARGINAL_ZONE_B_CELL_DIFFERENTIATION	1.79061	0.0888044	Not
GOBP_PLASMA_CELL_DIFFERENTIATION	-1.33638	0.195987	Not
GOBP_MYELOID_PROGENITOR_CELL_DIFFERENTIATION	-1.12427	0.28118	Not
GOBP_LYMPHOID_PROGENITOR_CELL_DIFFERENTIATION	0.814678	0.424405	Not
GOBP_B_CELL_PROLIFERATION_INVOLVED_IN_IMMUNE_RESPONSE	-1.32587	0.200316	Not
GOBP_NATURAL_KILLER_CELL_ACTIVATION_INVOLVED_IN_IMMUNE_RESPONSE	1.13521	0.269741	Not
GOBP_B_CELL_LINEAGE_COMMITMENT	0.454814	0.655369	Not
GOBP_IMMATURE_B_CELL_DIFFERENTIATION	0.401352	0.695871	Not
GOBP_PRO_B_CELL_DIFFERENTIATION	1.66561	0.112128	Not
GOBP_MATURE_B_CELL_DIFFERENTIATION	0.185593	0.854647	Not
GOBP_RESPONSE_TO_TUMOR_CELL	1.39924	0.177525	Not
GOBP_HISTAMINE_PRODUCTION_INVOLVED_IN_INFLAMMATORY_RESPONSE	-2.99188	0.00713592	Down
GOBP_DEFENSE_RESPONSE_TO_TUMOR_CELL	1.46395	0.158017	Not
GOBP_T_CELL_LINEAGE_COMMITMENT	1.04603	0.31055	Not
GOBP_CD4_POSITIVE_CD25_POSITIVE_ALPHA_BETA_REGULATORY_T_CELL_DIFFERENTIATION	0.288154	0.776129	Not
GOBP_CYTOKINE_PRODUCTION_INVOLVED_IN_IMMUNE_RESPONSE	-0.504734	0.619856	Not
GOBP_T_CELL_CYTOKINE_PRODUCTION	1.38082	0.182592	Not
GOBP_NATURAL_KILLER_CELL_CYTOKINE_PRODUCTION	1.87835	0.0751132	Not
GOBP_DENDRITIC_CELL_CYTOKINE_PRODUCTION	-1.44608	0.162955	Not
GOBP_MYELOID_DENDRITIC_CELL_CYTOKINE_PRODUCTION	0.111966	0.91207	Not
GOBP_IMMUNOGLOBULIN_PRODUCTION	-1.12108	0.276051	Not
GOBP_IMMUNOGLOBULIN_PRODUCTION_INVOLVED_IN_IMMUNOGLOBULIN_MEDIATED_IMMUNE_RESPONSE	-2.15001	0.04336	Down
GOBP_DENDRITIC_CELL_CHEMOTAXIS	-2.29247	0.0348052	Down
GOBP_MYELOID_DENDRITIC_CELL_CHEMOTAXIS	1.00604	0.326191	Not
GOBP_IMMUNE_RESPONSE_TO_TUMOR_CELL	0.874893	0.391788	Not
GOBP_NATURAL_KILLER_CELL_MEDIATED_IMMUNE_RESPONSE_TO_TUMOR_CELL	-0.190965	0.850388	Not
GOBP_T_CELL_MEDIATED_IMMUNE_RESPONSE_TO_TUMOR_CELL	0.997041	0.330096	Not
GOBP_ANTIGEN_PROCESSING_AND_PRESENTATION_OF_PEPTIDE_ANTIGEN_VIA_MHC_CLASS_IB	1.91663	0.069016	Not
GOBP_COMPLEMENT_RECEPTOR_MEDIATED_SIGNALING_PATHWAY	-2.13705	0.0461057	Down
GOBP_FC_RECEPTOR_MEDIATED_STIMULATORY_SIGNALING_PATHWAY	-1.42392	0.169162	Not
GOBP_IMMUNE_RESPONSE_REGULATING_CELL_SURFACE_RECEPTOR_SIGNALING_PATHWAY_INVOLVED_IN_PHAGOCYTOSIS	-0.867546	0.396253	Not
GOBP_IMMUNE_COMPLEX_CLEARANCE	-1.11648	0.27829	Not
GOBP_INFLAMMATORY_RESPONSE_TO_ANTIGENIC_STIMULUS	-1.61075	0.122543	Not
GOBP_ACUTE_INFLAMMATORY_RESPONSE_TO_ANTIGENIC_STIMULUS	-0.104011	0.918245	Not
GOBP_PRODUCTION_OF_MOLECULAR_MEDIATOR_OF_IMMUNE_RESPONSE	-0.9967	0.332552	Not
GOBP_LEUKOCYTE_MEDIATED_IMMUNITY	-0.72702	0.476917	Not
GOBP_MYELOID_LEUKOCYTE_MEDIATED_IMMUNITY	-1.11067	0.281865	Not
GOBP_TYPE_II_HYPERSENSITIVITY	-0.184121	0.855962	Not
GOBP_NEUTROPHIL_MEDIATED_IMMUNITY	0.179008	0.859675	Not
GOBP_EOSINOPHIL_MEDIATED_IMMUNITY	-1.55632	0.13459	Not
GOBP_MAST_CELL_MEDIATED_IMMUNITY	-1.43204	0.167482	Not
GOBP_LYMPHOCYTE_MEDIATED_IMMUNITY	-0.389625	0.700982	Not
GOBP_HUMORAL_IMMUNE_RESPONSE_MEDIATED_BY_CIRCULATING_IMMUNOGLOBULIN	-0.290717	0.77412	Not
GOBP_T_CELL_MEDIATED_IMMUNITY	-0.08442	0.93359	Not
GOBP_T_CELL_ANTIGEN_PROCESSING_AND_PRESENTATION	-0.12013	0.905569	Not
GOBP_ADAPTIVE_IMMUNE_RESPONSE_BASED_ON_SOMATIC_RECOMBINATION_OF_IMMUNE_RECEPTORS_BUILT_FROM_IMMUNOGLOBULIN_SUPERFAMILY_DOMAINS	-0.662351	0.517524	Not
GOBP_TOLERANCE_INDUCTION_DEPENDENT_UPON_IMMUNE_RESPONSE	0.795257	0.435401	Not
GOBP_GERMINAL_CENTER_FORMATION	1.15506	0.262065	Not
GOBP_DENDRITIC_CELL_ANTIGEN_PROCESSING_AND_PRESENTATION	-2.42428	0.0245262	Down
GOBP_ANTIGEN_PROCESSING_AND_PRESENTATION_OF_PEPTIDE_ANTIGEN_VIA_MHC_CLASS_I	1.06512	0.298992	Not
GOBP_ANTIGEN_PROCESSING_AND_PRESENTATION_VIA_MHC_CLASS_IB	1.11235	0.280114	Not
GOBP_ANTIGEN_PROCESSING_AND_PRESENTATION_OF_EXOGENOUS_PEPTIDE_ANTIGEN	0.257376	0.799539	Not
GOBP_ANTIGEN_PROCESSING_AND_PRESENTATION_OF_ENDOGENOUS_PEPTIDE_ANTIGEN	0.911933	0.372165	Not
GOBP_ANTIGEN_PROCESSING_AND_PRESENTATION_OF_ENDOGENOUS_PEPTIDE_ANTIGEN_VIA_MHC_CLASS_I_VIA_ER_PATHWAY	2.29574	0.0321199	Up
GOBP_PEPTIDE_ANTIGEN_ASSEMBLY_WITH_MHC_PROTEIN_COMPLEX	-0.436634	0.666834	Not
GOBP_PEPTIDE_ANTIGEN_ASSEMBLY_WITH_MHC_CLASS_II_PROTEIN_COMPLEX	-0.660739	0.516085	Not
GOBP_ANTIGEN_PROCESSING_AND_PRESENTATION_OF_PEPTIDE_OR_POLYSACCHARIDE_ANTIGEN_VIA_MHC_CLASS_II	-0.844847	0.40822	Not
GOBP_TOLERANCE_INDUCTION	0.329013	0.745647	Not
GOBP_TOLERANCE_INDUCTION_TO_SELF_ANTIGEN	-0.103646	0.918832	Not
GOBP_T_CELL_TOLERANCE_INDUCTION	0.400076	0.693445	Not
GOBP_IMMUNE_SYSTEM_DEVELOPMENT	0.203426	0.840856	Not
GOBP_LEUKOCYTE_DIFFERENTIATION	0.19534	0.84717	Not
GOBP_LEUKOCYTE_MIGRATION_INVOLVED_IN_INFLAMMATORY_RESPONSE	-2.36752	0.027594	Down
GOBP_HYPERSENSITIVITY	-0.538334	0.596368	Not
GOBP_ACUTE_INFLAMMATORY_RESPONSE	-0.0554539	0.956331	Not
GOBP_PRODUCTION_OF_MOLECULAR_MEDIATOR_INVOLVED_IN_INFLAMMATORY_RESPONSE	-0.757123	0.457398	Not
GOBP_CYTOKINE_PRODUCTION_INVOLVED_IN_INFLAMMATORY_RESPONSE	-0.16124	0.873446	Not
GOBP_RESPIRATORY_BURST_INVOLVED_IN_INFLAMMATORY_RESPONSE	-0.335007	0.741178	Not
GOBP_CHRONIC_INFLAMMATORY_RESPONSE	-0.808296	0.428132	Not
GOBP_MONOCYTE_CHEMOTAXIS	-1.48613	0.152164	Not
GOBP_MAST_CELL_CHEMOTAXIS	1.28302	0.213695	Not
GOBP_SOMATIC_DIVERSIFICATION_OF_IMMUNE_RECEPTORS_VIA_SOMATIC_MUTATION	-1.51807	0.151157	Not
GOBP_SOMATIC_DIVERSIFICATION_OF_T_CELL_RECEPTOR_GENES	-0.906385	0.37628	Not
GOBP_MYELOID_LEUKOCYTE_DIFFERENTIATION	0.154299	0.878873	Not
GOBP_PLATELET_DEGRANULATION	0.280735	0.781741	Not
GOBP_REGULATION_OF_ANTIGEN_PROCESSING_AND_PRESENTATION	-1.60586	0.123278	Not
GOBP_NEGATIVE_REGULATION_OF_ANTIGEN_PROCESSING_AND_PRESENTATION	-1.7552	0.0956399	Not
GOBP_POSITIVE_REGULATION_OF_ANTIGEN_PROCESSING_AND_PRESENTATION	-1.72815	0.099061	Not
GOBP_REGULATION_OF_ANTIGEN_PROCESSING_AND_PRESENTATION_OF_PEPTIDE_OR_POLYSACCHARIDE_ANTIGEN_VIA_MHC_CLASS_II	-0.1952	0.847732	Not
GOBP_REGULATION_OF_ANTIGEN_PROCESSING_AND_PRESENTATION_OF_PEPTIDE_ANTIGEN	-0.481028	0.636648	Not
GOBP_REGULATION_OF_DENDRITIC_CELL_ANTIGEN_PROCESSING_AND_PRESENTATION	-2.62698	0.0157554	Down
GOBP_POSITIVE_REGULATION_OF_DENDRITIC_CELL_ANTIGEN_PROCESSING_AND_PRESENTATION	-2.0541	0.0526539	Not
GOBP_REGULATION_OF_GERMINAL_CENTER_FORMATION	-0.0331002	0.973908	Not
GOBP_REGULATION_OF_IMMUNOGLOBULIN_PRODUCTION	-0.155895	0.877814	Not
GOBP_NEGATIVE_REGULATION_OF_IMMUNOGLOBULIN_PRODUCTION	-0.679519	0.50471	Not
GOBP_POSITIVE_REGULATION_OF_IMMUNOGLOBULIN_PRODUCTION	-0.426681	0.674184	Not
GOBP_REGULATION_OF_TOLERANCE_INDUCTION	-0.614214	0.546097	Not
GOBP_POSITIVE_REGULATION_OF_TOLERANCE_INDUCTION	-0.547125	0.590544	Not
GOBP_POSITIVE_REGULATION_OF_T_CELL_TOLERANCE_INDUCTION	-0.515023	0.612409	Not
GOBP_REGULATION_OF_ACUTE_INFLAMMATORY_RESPONSE	-0.522299	0.606931	Not
GOBP_NEGATIVE_REGULATION_OF_ACUTE_INFLAMMATORY_RESPONSE	-0.692304	0.4999	Not
GOBP_POSITIVE_REGULATION_OF_ACUTE_INFLAMMATORY_RESPONSE	-1.33355	0.197262	Not
GOBP_REGULATION_OF_CHRONIC_INFLAMMATORY_RESPONSE	0.3548	0.726524	Not
GOBP_NEGATIVE_REGULATION_OF_CHRONIC_INFLAMMATORY_RESPONSE	0.119112	0.906434	Not
GOBP_RESPIRATORY_BURST_INVOLVED_IN_DEFENSE_RESPONSE	-0.817435	0.422884	Not
GOBP_REGULATION_OF_IMMUNE_SYSTEM_PROCESS	-0.27652	0.785144	Not
GOBP_NEGATIVE_REGULATION_OF_IMMUNE_SYSTEM_PROCESS	-0.398233	0.694481	Not
GOBP_POSITIVE_REGULATION_OF_IMMUNE_SYSTEM_PROCESS	-0.52578	0.605788	Not
GOBP_REGULATION_OF_LEUKOCYTE_MIGRATION	-0.344452	0.734006	Not
GOBP_NEGATIVE_REGULATION_OF_LEUKOCYTE_MIGRATION	-2.25424	0.0385781	Down
GOBP_POSITIVE_REGULATION_OF_LEUKOCYTE_MIGRATION	-0.100773	0.920696	Not
GOBP_REGULATION_OF_LEUKOCYTE_CHEMOTAXIS	-0.780771	0.443704	Not
GOBP_NEGATIVE_REGULATION_OF_LEUKOCYTE_CHEMOTAXIS	-1.34704	0.195637	Not
GOBP_POSITIVE_REGULATION_OF_LEUKOCYTE_CHEMOTAXIS	-0.397175	0.695257	Not
GOBP_REGULATION_OF_CELLULAR_EXTRAVASATION	1.20353	0.242415	Not
GOBP_NEGATIVE_REGULATION_OF_CELLULAR_EXTRAVASATION	-1.46158	0.160428	Not
GOBP_POSITIVE_REGULATION_OF_CELLULAR_EXTRAVASATION	1.11327	0.278695	Not
GOBP_REGULATION_OF_IMMUNE_EFFECTOR_PROCESS	-0.920999	0.370951	Not
GOBP_NEGATIVE_REGULATION_OF_IMMUNE_EFFECTOR_PROCESS	-0.719621	0.479848	Not
GOBP_POSITIVE_REGULATION_OF_IMMUNE_EFFECTOR_PROCESS	-0.790138	0.440877	Not
GOBP_REGULATION_OF_PRODUCTION_OF_MOLECULAR_MEDIATOR_OF_IMMUNE_RESPONSE	-0.571937	0.574529	Not
GOBP_NEGATIVE_REGULATION_OF_PRODUCTION_OF_MOLECULAR_MEDIATOR_OF_IMMUNE_RESPONSE	-1.09902	0.284597	Not
GOBP_POSITIVE_REGULATION_OF_PRODUCTION_OF_MOLECULAR_MEDIATOR_OF_IMMUNE_RESPONSE	-0.0864816	0.932039	Not
GOBP_REGULATION_OF_LEUKOCYTE_MEDIATED_IMMUNITY	-0.869392	0.397381	Not
GOBP_NEGATIVE_REGULATION_OF_LEUKOCYTE_MEDIATED_IMMUNITY	-0.83324	0.414097	Not
GOBP_POSITIVE_REGULATION_OF_LEUKOCYTE_MEDIATED_IMMUNITY	0.24429	0.809391	Not
GOBP_REGULATION_OF_LYMPHOCYTE_MEDIATED_IMMUNITY	-0.0688786	0.945822	Not
GOBP_NEGATIVE_REGULATION_OF_LYMPHOCYTE_MEDIATED_IMMUNITY	-0.425011	0.675243	Not
GOBP_POSITIVE_REGULATION_OF_LYMPHOCYTE_MEDIATED_IMMUNITY	0.703273	0.48961	Not
GOBP_REGULATION_OF_T_CELL_MEDIATED_IMMUNITY	-0.528666	0.602998	Not
GOBP_NEGATIVE_REGULATION_OF_T_CELL_MEDIATED_IMMUNITY	-1.65791	0.112535	Not
GOBP_POSITIVE_REGULATION_OF_T_CELL_MEDIATED_IMMUNITY	0.865758	0.397105	Not
GOBP_REGULATION_OF_B_CELL_MEDIATED_IMMUNITY	-1.04919	0.306575	Not
GOBP_NEGATIVE_REGULATION_OF_B_CELL_MEDIATED_IMMUNITY	-0.276845	0.785037	Not
GOBP_POSITIVE_REGULATION_OF_B_CELL_MEDIATED_IMMUNITY	-1.17622	0.252762	Not
GOBP_REGULATION_OF_NATURAL_KILLER_CELL_MEDIATED_IMMUNITY	1.11509	0.277416	Not
GOBP_NEGATIVE_REGULATION_OF_NATURAL_KILLER_CELL_MEDIATED_IMMUNITY	0.650889	0.52254	Not
GOBP_POSITIVE_REGULATION_OF_NATURAL_KILLER_CELL_MEDIATED_IMMUNITY	1.60618	0.123725	Not
GOBP_NEGATIVE_REGULATION_OF_CYTOKINE_PRODUCTION_INVOLVED_IN_IMMUNE_RESPONSE	-1.11674	0.277327	Not
GOBP_POSITIVE_REGULATION_OF_CYTOKINE_PRODUCTION_INVOLVED_IN_IMMUNE_RESPONSE	0.288448	0.77601	Not
GOBP_NEGATIVE_REGULATION_OF_T_CELL_CYTOKINE_PRODUCTION	0.553294	0.586087	Not
GOBP_POSITIVE_REGULATION_OF_T_CELL_CYTOKINE_PRODUCTION	1.57971	0.132142	Not
GOBP_POSITIVE_REGULATION_OF_DENDRITIC_CELL_CYTOKINE_PRODUCTION	-1.19973	0.244658	Not
GOBP_CELL_SURFACE_PATTERN_RECOGNITION_RECEPTOR_SIGNALING_PATHWAY	-0.941306	0.361687	Not
GOBP_CYTOPLASMIC_PATTERN_RECOGNITION_RECEPTOR_SIGNALING_PATHWAY	-0.384186	0.704925	Not
GOBP_MYD88_DEPENDENT_TOLL_LIKE_RECEPTOR_SIGNALING_PATHWAY	-0.9618	0.347115	Not
GOBP_MYD88_INDEPENDENT_TOLL_LIKE_RECEPTOR_SIGNALING_PATHWAY	-0.948897	0.353494	Not
GOBP_INNATE_IMMUNE_RESPONSE_ACTIVATING_SIGNAL_TRANSDUCTION	-0.836556	0.412792	Not
GOBP_REGULATION_OF_ANTIMICROBIAL_HUMORAL_RESPONSE	-1.06394	0.301085	Not
GOBP_POSITIVE_REGULATION_OF_ANTIMICROBIAL_HUMORAL_RESPONSE	-0.764432	0.454388	Not
GOBP_REGULATION_OF_MYELOID_LEUKOCYTE_DIFFERENTIATION	-0.0992129	0.921912	Not
GOBP_NEGATIVE_REGULATION_OF_MYELOID_LEUKOCYTE_DIFFERENTIATION	-0.287061	0.776936	Not
GOBP_POSITIVE_REGULATION_OF_MYELOID_LEUKOCYTE_DIFFERENTIATION	-0.116174	0.908744	Not
GOBP_IMMUNE_RESPONSE_REGULATING_SIGNALING_PATHWAY	-0.751158	0.462476	Not
GOBP_IMMUNE_RESPONSE_INHIBITING_SIGNAL_TRANSDUCTION	-0.0112181	0.991156	Not
GOBP_IMMUNE_RESPONSE_INHIBITING_CELL_SURFACE_RECEPTOR_SIGNALING_PATHWAY	0.177234	0.861062	Not
GOBP_IMMUNE_RESPONSE_REGULATING_CELL_SURFACE_RECEPTOR_SIGNALING_PATHWAY	-0.932417	0.365933	Not
GOBP_FC_RECEPTOR_MEDIATED_INHIBITORY_SIGNALING_PATHWAY	-0.619282	0.543537	Not
GOBP_ANTIMICROBIAL_PEPTIDE_PRODUCTION	-0.228279	0.821929	Not
GOBP_ANTIBACTERIAL_PEPTIDE_PRODUCTION	-1.14433	0.268532	Not
GOBP_REGULATION_OF_ANTIMICROBIAL_PEPTIDE_PRODUCTION	-0.836736	0.413053	Not
GOBP_REGULATION_OF_ANTIBACTERIAL_PEPTIDE_PRODUCTION	-2.03487	0.0556401	Not
GOBP_NEGATIVE_REGULATION_OF_PEPTIDE_SECRETION	1.97173	0.0637847	Not
GOBP_POSITIVE_REGULATION_OF_PEPTIDE_SECRETION	1.3309	0.200632	Not
GOBP_POSITIVE_REGULATION_OF_ANTIBACTERIAL_PEPTIDE_PRODUCTION	-2.46593	0.0232263	Down
GOBP_REGULATION_OF_ADAPTIVE_IMMUNE_RESPONSE	-0.796007	0.43759	Not
GOBP_NEGATIVE_REGULATION_OF_ADAPTIVE_IMMUNE_RESPONSE	-0.588839	0.562263	Not
GOBP_POSITIVE_REGULATION_OF_ADAPTIVE_IMMUNE_RESPONSE	-0.0749296	0.940994	Not
GOBP_REGULATION_OF_T_HELPER_1_TYPE_IMMUNE_RESPONSE	-1.12245	0.274555	Not
GOBP_NEGATIVE_REGULATION_OF_T_HELPER_1_TYPE_IMMUNE_RESPONSE	0.347883	0.731868	Not
GOBP_POSITIVE_REGULATION_OF_T_HELPER_1_TYPE_IMMUNE_RESPONSE	-0.997338	0.330601	Not
GOBP_NEGATIVE_REGULATION_OF_TYPE_2_IMMUNE_RESPONSE	-0.935846	0.36002	Not
GOBP_POSITIVE_REGULATION_OF_TYPE_2_IMMUNE_RESPONSE	2.02718	0.0564028	Not
GOBP_REGULATION_OF_RESPONSE_TO_BIOTIC_STIMULUS	-0.153269	0.879715	Not
GOBP_NEGATIVE_REGULATION_OF_RESPONSE_TO_BIOTIC_STIMULUS	0.0908836	0.928458	Not
GOBP_POSITIVE_REGULATION_OF_RESPONSE_TO_BIOTIC_STIMULUS	0.0282434	0.977742	Not
GOBP_REGULATION_OF_RESPONSE_TO_TUMOR_CELL	0.390533	0.700593	Not
GOBP_POSITIVE_REGULATION_OF_RESPONSE_TO_TUMOR_CELL	0.949675	0.353119	Not
GOBP_REGULATION_OF_T_CELL_MEDIATED_IMMUNE_RESPONSE_TO_TUMOR_CELL	0.487345	0.631063	Not
GOBP_POSITIVE_REGULATION_OF_T_CELL_MEDIATED_IMMUNE_RESPONSE_TO_TUMOR_CELL	1.4772	0.157734	Not
GOBP_REGULATION_OF_NATURAL_KILLER_CELL_MEDIATED_IMMUNE_RESPONSE_TO_TUMOR_CELL	-0.511168	0.61465	Not
GOBP_POSITIVE_REGULATION_OF_NATURAL_KILLER_CELL_MEDIATED_IMMUNE_RESPONSE_TO_TUMOR_CELL	0.057264	0.95504	Not
GOBP_REGULATION_OF_INFLAMMATORY_RESPONSE_TO_ANTIGENIC_STIMULUS	-1.91316	0.06947	Not
GOBP_NEGATIVE_REGULATION_OF_INFLAMMATORY_RESPONSE_TO_ANTIGENIC_STIMULUS	-2.7121	0.0131023	Down
GOBP_POSITIVE_REGULATION_OF_INFLAMMATORY_RESPONSE_TO_ANTIGENIC_STIMULUS	0.355832	0.725898	Not
GOBP_REGULATION_OF_ACUTE_INFLAMMATORY_RESPONSE_TO_ANTIGENIC_STIMULUS	-0.808619	0.429266	Not
GOBP_NEGATIVE_REGULATION_OF_ACUTE_INFLAMMATORY_RESPONSE_TO_ANTIGENIC_STIMULUS	-2.54776	0.0213952	Down
GOBP_POSITIVE_REGULATION_OF_ACUTE_INFLAMMATORY_RESPONSE_TO_ANTIGENIC_STIMULUS	0.391413	0.699706	Not
GOBP_REGULATION_OF_HYPERSENSITIVITY	-1.32399	0.200145	Not
GOBP_POSITIVE_REGULATION_OF_HYPERSENSITIVITY	0.399873	0.693315	Not
GOBP_REGULATION_OF_MYELOID_LEUKOCYTE_MEDIATED_IMMUNITY	-1.83175	0.0846465	Not
GOBP_NEGATIVE_REGULATION_OF_MYELOID_LEUKOCYTE_MEDIATED_IMMUNITY	-1.90974	0.0748692	Not
GOBP_POSITIVE_REGULATION_OF_MYELOID_LEUKOCYTE_MEDIATED_IMMUNITY	-0.773725	0.447782	Not
GOBP_REGULATION_OF_B_CELL_APOPTOTIC_PROCESS	-1.18518	0.251789	Not
GOBP_NEGATIVE_REGULATION_OF_B_CELL_APOPTOTIC_PROCESS	-0.619372	0.543466	Not
GOBP_POSITIVE_REGULATION_OF_LYMPHOCYTE_ANERGY	-0.570343	0.575607	Not
GOBP_REGULATION_OF_HUMORAL_IMMUNE_RESPONSE	-1.4035	0.176659	Not
GOBP_NEGATIVE_REGULATION_OF_HUMORAL_IMMUNE_RESPONSE	-0.000478092	0.999623	Not
GOBP_POSITIVE_REGULATION_OF_HUMORAL_IMMUNE_RESPONSE	-2.77179	0.0122119	Down
GOBP_REGULATION_OF_HUMORAL_IMMUNE_RESPONSE_MEDIATED_BY_CIRCULATING_IMMUNOGLOBULIN	-0.835403	0.412902	Not
GOBP_NEGATIVE_REGULATION_OF_HUMORAL_IMMUNE_RESPONSE_MEDIATED_BY_CIRCULATING_IMMUNOGLOBULIN	0.0231198	0.981778	Not
GOBP_POSITIVE_REGULATION_OF_HUMORAL_IMMUNE_RESPONSE_MEDIATED_BY_CIRCULATING_IMMUNOGLOBULIN	-1.48728	0.152322	Not
GOBP_RESPONSE_TO_ISCHEMIA	-0.00597451	0.995291	Not
GOBP_LIPID_HYDROXYLATION	0.686251	0.503238	Not
GOBP_DESMOSOME_ORGANIZATION	-1.25555	0.227495	Not
GOBP_SYNOVIOCYTE_PROLIFERATION	-0.605209	0.553453	Not
GOBP_TRNA_THREONYLCARBAMOYLADENOSINE_MODIFICATION	-4.169	0.00046038	Down
GOBP_REGIONALIZATION	3.27628	0.00405373	Up
GOBP_DEVELOPMENTAL_PROCESS_INVOLVED_IN_REPRODUCTION	-0.666219	0.513308	Not
GOBP_HEART_MORPHOGENESIS	5.03455	5.57668e-05	Up
GOBP_SKELETAL_MUSCLE_CONTRACTION	1.04388	0.308421	Not
GOBP_VOLUNTARY_SKELETAL_MUSCLE_CONTRACTION	-0.107363	0.915929	Not
GOBP_MUSCLE_SYSTEM_PROCESS	0.230193	0.820404	Not
GOBP_CIRCULATORY_SYSTEM_PROCESS	2.02349	0.0581123	Not
GOBP_RENAL_SYSTEM_PROCESS	1.75335	0.0941713	Not
GOBP_HEART_PROCESS	1.24771	0.230409	Not
GOBP_RESPIRATORY_SYSTEM_PROCESS	2.49331	0.0222473	Up
GOBP_VASCULAR_PROCESS_IN_CIRCULATORY_SYSTEM	2.02884	0.0577605	Not
GOBP_REGULATION_OF_SYSTEMIC_ARTERIAL_BLOOD_PRESSURE_MEDIATED_BY_A_CHEMICAL_SIGNAL	0.313223	0.757201	Not
GOBP_REGULATION_OF_VASCULAR_ASSOCIATED_SMOOTH_MUSCLE_CONTRACTION	-0.0114234	0.991027	Not
GOBP_REGULATION_OF_THE_FORCE_OF_HEART_CONTRACTION_BY_CHEMICAL_SIGNAL	1.67016	0.110844	Not
GOBP_REGULATION_OF_HEART_RATE_BY_CHEMICAL_SIGNAL	2.32805	0.0308884	Up
GOBP_RENAL_SYSTEM_PROCESS_INVOLVED_IN_REGULATION_OF_SYSTEMIC_ARTERIAL_BLOOD_PRESSURE	0.472399	0.642136	Not
GOBP_RENAL_CONTROL_OF_PERIPHERAL_VASCULAR_RESISTANCE_INVOLVED_IN_REGULATION_OF_SYSTEMIC_ARTERIAL_BLOOD_PRESSURE	-0.159907	0.874814	Not
GOBP_REGULATION_OF_SYSTEMIC_ARTERIAL_BLOOD_PRESSURE	0.908982	0.377454	Not
GOBP_REGULATION_OF_SYSTEMIC_ARTERIAL_BLOOD_PRESSURE_BY_RENIN_ANGIOTENSIN	0.381532	0.707341	Not
GOBP_POSITIVE_REGULATION_OF_SYSTEMIC_ARTERIAL_BLOOD_PRESSURE	-0.277342	0.785762	Not
GOBP_NEGATIVE_REGULATION_OF_SYSTEMIC_ARTERIAL_BLOOD_PRESSURE	1.05603	0.303462	Not
GOBP_RENAL_WATER_HOMEOSTASIS	2.31236	0.0312332	Up
GOBP_REGULATION_OF_GLOMERULAR_FILTRATION	-0.013378	0.989505	Not
GOBP_RENAL_SODIUM_ION_TRANSPORT	1.20197	0.242766	Not
GOBP_RENAL_WATER_TRANSPORT	1.05274	0.304426	Not
GOBP_REGULATION_OF_SYSTEMIC_ARTERIAL_BLOOD_PRESSURE_BY_ENDOTHELIN	1.69753	0.109962	Not
GOBP_HEART_FIELD_SPECIFICATION	1.95641	0.0669991	Not
GOBP_SECONDARY_HEART_FIELD_SPECIFICATION	1.78575	0.0890529	Not
GOBP_DETERMINATION_OF_LEFT_RIGHT_ASYMMETRY_IN_LATERAL_MESODERM	-0.112911	0.912046	Not
GOBP_EMBRYONIC_HEART_TUBE_MORPHOGENESIS	2.33924	0.0300181	Up
GOBP_OUTFLOW_TRACT_SEPTUM_MORPHOGENESIS	0.252023	0.803926	Not
GOBP_MEMBRANOUS_SEPTUM_MORPHOGENESIS	1.37397	0.184343	Not
GOBP_MUSCULAR_SEPTUM_MORPHOGENESIS	3.28513	0.00381685	Up
GOBP_OUTFLOW_TRACT_MORPHOGENESIS	2.65828	0.0153179	Up
GOBP_REGULATION_OF_ANIMAL_ORGAN_FORMATION	1.54307	0.141123	Not
GOBP_ENDOCARDIUM_DEVELOPMENT	3.58098	0.00193197	Up
GOBP_ENDOTHELIUM_DEVELOPMENT	1.39995	0.176397	Not
GOBP_MORPHOGENESIS_OF_AN_ENDOTHELIUM	0.622355	0.540475	Not
GOBP_ENDOCARDIUM_MORPHOGENESIS	1.03943	0.318806	Not
GOBP_CARDIAC_CONDUCTION_SYSTEM_DEVELOPMENT	-0.532015	0.604293	Not
GOBP_ATRIOVENTRICULAR_NODE_DEVELOPMENT	-0.143685	0.887309	Not
GOBP_SINOATRIAL_NODE_DEVELOPMENT	-1.25766	0.228196	Not
GOBP_HIS_PURKINJE_SYSTEM_DEVELOPMENT	-0.680808	0.506081	Not
GOBP_HEART_VALVE_DEVELOPMENT	1.97545	0.062957	Not
GOBP_ATRIOVENTRICULAR_VALVE_DEVELOPMENT	2.96306	0.00750109	Up
GOBP_MITRAL_VALVE_DEVELOPMENT	0.925562	0.365189	Not
GOBP_TRICUSPID_VALVE_DEVELOPMENT	-0.376856	0.710148	Not
GOBP_PULMONARY_VALVE_DEVELOPMENT	1.41212	0.173353	Not
GOBP_HEART_VALVE_MORPHOGENESIS	2.34717	0.0290838	Up
GOBP_AORTIC_VALVE_MORPHOGENESIS	0.833192	0.414167	Not
GOBP_PULMONARY_VALVE_MORPHOGENESIS	2.0039	0.058198	Not
GOBP_TRICUSPID_VALVE_MORPHOGENESIS	-0.626749	0.537579	Not
GOBP_HEART_VALVE_FORMATION	1.61852	0.123228	Not
GOBP_ATRIOVENTRICULAR_VALVE_FORMATION	1.25056	0.225126	Not
GOBP_ENDOCARDIAL_CUSHION_DEVELOPMENT	2.45976	0.0228316	Up
GOBP_EPITHELIAL_TO_MESENCHYMAL_TRANSITION_INVOLVED_IN_ENDOCARDIAL_CUSHION_FORMATION	1.26627	0.221713	Not
GOBP_ENDOCARDIAL_CUSHION_MORPHOGENESIS	2.26366	0.0352187	Up
GOBP_CARDIAC_CHAMBER_DEVELOPMENT	3.43415	0.00249849	Up
GOBP_CARDIAC_CHAMBER_MORPHOGENESIS	3.48305	0.00224436	Up
GOBP_CARDIAC_CHAMBER_FORMATION	0.957039	0.353892	Not
GOBP_CARDIAC_VENTRICLE_MORPHOGENESIS	3.53834	0.00194994	Up
GOBP_CARDIAC_ATRIUM_MORPHOGENESIS	2.39176	0.0262959	Up
GOBP_CARDIAC_VENTRICLE_FORMATION	0.103343	0.918827	Not
GOBP_CARDIAC_LEFT_VENTRICLE_MORPHOGENESIS	1.78357	0.0949149	Not
GOBP_CARDIAC_RIGHT_VENTRICLE_MORPHOGENESIS	1.48068	0.153765	Not
GOBP_VENTRICULAR_TRABECULA_MYOCARDIUM_MORPHOGENESIS	1.24711	0.226436	Not
GOBP_VENTRICULAR_COMPACT_MYOCARDIUM_MORPHOGENESIS	-0.24605	0.808864	Not
GOBP_ATRIAL_CARDIAC_MUSCLE_TISSUE_DEVELOPMENT	0.082689	0.93501	Not
GOBP_VENTRICULAR_CARDIAC_MUSCLE_TISSUE_DEVELOPMENT	2.62218	0.0164	Up
GOBP_CARDIAC_ATRIUM_DEVELOPMENT	2.50544	0.0245243	Up
GOBP_CARDIAC_VENTRICLE_DEVELOPMENT	3.19549	0.00436895	Up
GOBP_GROWTH_INVOLVED_IN_HEART_MORPHOGENESIS	0.299987	0.767894	Not
GOBP_CARDIAC_NEURAL_CREST_CELL_MIGRATION_INVOLVED_IN_OUTFLOW_TRACT_MORPHOGENESIS	1.15626	0.260704	Not
GOBP_REGULATION_OF_MEMBRANE_DEPOLARIZATION	1.49447	0.150426	Not
GOBP_CARDIOBLAST_PROLIFERATION	1.78957	0.0888222	Not
GOBP_REGULATION_OF_SECONDARY_HEART_FIELD_CARDIOBLAST_PROLIFERATION	2.27235	0.034185	Up
GOBP_ENDOCARDIAL_CUSHION_FORMATION	2.0639	0.0523622	Not
GOBP_ENDOCARDIAL_CUSHION_FUSION	-0.428122	0.673063	Not
GOBP_APOPTOTIC_PROCESS_INVOLVED_IN_HEART_MORPHOGENESIS	1.56844	0.136881	Not
GOBP_CARDIAC_SEPTUM_DEVELOPMENT	3.40548	0.00266791	Up
GOBP_VENTRICULAR_SEPTUM_DEVELOPMENT	3.8606	0.000913605	Up
GOBP_ATRIAL_SEPTUM_DEVELOPMENT	2.0828	0.0532302	Not
GOBP_SEPTUM_PRIMUM_DEVELOPMENT	1.95446	0.0645338	Not
GOBP_MUSCLE_HYPERTROPHY_IN_RESPONSE_TO_STRESS	1.1347	0.272122	Not
GOBP_PHYSIOLOGICAL_CARDIAC_MUSCLE_HYPERTROPHY	-0.104708	0.917667	Not
GOBP_WNT_SIGNALING_PATHWAY_INVOLVED_IN_HEART_DEVELOPMENT	2.62069	0.0160101	Up
GOBP_REGULATION_OF_WNT_SIGNALING_PATHWAY_INVOLVED_IN_HEART_DEVELOPMENT	2.29319	0.0339582	Up
GOBP_NEGATIVE_REGULATION_OF_WNT_SIGNALING_PATHWAY_INVOLVED_IN_HEART_DEVELOPMENT	2.31144	0.0348109	Up
GOBP_TYPE_B_PANCREATIC_CELL_DIFFERENTIATION	0.576794	0.570367	Not
GOBP_PANCREATIC_A_CELL_DIFFERENTIATION	0.664993	0.513834	Not
GOBP_POSITIVE_REGULATION_OF_BLOOD_PRESSURE_BY_EPINEPHRINE_NOREPINEPHRINE	-0.575156	0.571889	Not
GOBP_TYPE_B_PANCREATIC_CELL_DEVELOPMENT	0.290377	0.774857	Not
GOBP_REGULATION_OF_EXTRACELLULAR_MATRIX_CONSTITUENT_SECRETION	0.212015	0.834297	Not
GOBP_POSITIVE_REGULATION_OF_EXTRACELLULAR_MATRIX_CONSTITUENT_SECRETION	0.075595	0.940617	Not
GOBP_AMINO_ACID_TRANSMEMBRANE_TRANSPORT	0.494262	0.627016	Not
GOBP_KERATINOCYTE_DEVELOPMENT	1.91539	0.0695806	Not
GOBP_MESENCHYMAL_TO_EPITHELIAL_TRANSITION_INVOLVED_IN_METANEPHROS_MORPHOGENESIS	-0.388864	0.701329	Not
GOBP_METANEPHROS_MORPHOGENESIS	1.04615	0.308125	Not
GOBP_REGULATION_OF_MESENCHYMAL_TO_EPITHELIAL_TRANSITION_INVOLVED_IN_METANEPHROS_MORPHOGENESIS	-0.970252	0.345146	Not
GOBP_CILIUM_MOVEMENT	-0.21077	0.8351	Not
GOBP_PERICARDIUM_MORPHOGENESIS	0.450524	0.657898	Not
GOBP_REGULATION_OF_CILIUM_MOVEMENT	1.50131	0.148368	Not
GOBP_POSITIVE_REGULATION_OF_CILIUM_MOVEMENT	2.35411	0.0321176	Up
GOBP_REGULATION_OF_CILIUM_BEAT_FREQUENCY	0.997152	0.330569	Not
GOBP_NORADRENERGIC_NEURON_DIFFERENTIATION	1.96669	0.0632827	Not
GOBP_NORADRENERGIC_NEURON_DEVELOPMENT	0.184191	0.855881	Not
GOBP_BRAINSTEM_DEVELOPMENT	1.89691	0.0746646	Not
GOBP_SPHINGOSINE_1_PHOSPHATE_RECEPTOR_SIGNALING_PATHWAY	-0.31985	0.752292	Not
GOBP_EPITHELIAL_CELL_MORPHOGENESIS	2.61595	0.0169684	Up
GOBP_AXIS_ELONGATION	2.61633	0.0164005	Up
GOBP_PLANAR_CELL_POLARITY_PATHWAY_INVOLVED_IN_AXIS_ELONGATION	4.386	0.000330184	Up
GOBP_RETINAL_PIGMENT_EPITHELIUM_DEVELOPMENT	2.10799	0.0536354	Not
GOBP_NEURAL_RETINA_DEVELOPMENT	1.05366	0.311579	Not
GOBP_CHONDROCYTE_DIFFERENTIATION_INVOLVED_IN_ENDOCHONDRAL_BONE_MORPHOGENESIS	0.196529	0.846759	Not
GOBP_CHONDROCYTE_HYPERTROPHY	1.66342	0.117104	Not
GOBP_GROWTH_PLATE_CARTILAGE_DEVELOPMENT	1.65426	0.114722	Not
GOBP_GROWTH_PLATE_CARTILAGE_CHONDROCYTE_DIFFERENTIATION	0.145183	0.886157	Not
GOBP_GROWTH_PLATE_CARTILAGE_CHONDROCYTE_DEVELOPMENT	1.41271	0.173766	Not
GOBP_CHONDROCYTE_DEVELOPMENT_INVOLVED_IN_ENDOCHONDRAL_BONE_MORPHOGENESIS	1.2024	0.243694	Not
GOBP_DETECTION_OF_CALCIUM_ION	0.400322	0.694174	Not
GOBP_CARBOHYDRATE_METABOLIC_PROCESS	0.916989	0.370856	Not
GOBP_POLYSACCHARIDE_METABOLIC_PROCESS	0.48754	0.632147	Not
GOBP_REGULATION_OF_GLYCOGEN_CATABOLIC_PROCESS	-0.585737	0.56459	Not
GOBP_DISACCHARIDE_METABOLIC_PROCESS	0.173386	0.864845	Not
GOBP_MONOSACCHARIDE_METABOLIC_PROCESS	0.429338	0.672291	Not
GOBP_FRUCTOSE_METABOLIC_PROCESS	-0.152095	0.880653	Not
GOBP_FRUCTOSE_6_PHOSPHATE_METABOLIC_PROCESS	0.511189	0.616179	Not
GOBP_FRUCTOSE_2_6_BISPHOSPHATE_METABOLIC_PROCESS	-1.27284	0.219745	Not
GOBP_FUCOSE_METABOLIC_PROCESS	-0.731505	0.476311	Not
GOBP_GLUCOSE_METABOLIC_PROCESS	0.610223	0.548728	Not
GOBP_GLUCOSE_CATABOLIC_PROCESS	0.312595	0.75782	Not
GOBP_UDP_GLUCOSE_METABOLIC_PROCESS	0.978763	0.340237	Not
GOBP_GALACTOSE_METABOLIC_PROCESS	0.761625	0.456114	Not
GOBP_MANNOSE_METABOLIC_PROCESS	0.82698	0.418318	Not
GOBP_INOSITOL_METABOLIC_PROCESS	0.122948	0.903548	Not
GOBP_AMINOGLYCAN_METABOLIC_PROCESS	3.9202	0.000787175	Up
GOBP_AMINOGLYCAN_BIOSYNTHETIC_PROCESS	3.01742	0.00673193	Up
GOBP_AMINOGLYCAN_CATABOLIC_PROCESS	3.06238	0.00600985	Up
GOBP_GLYCOSAMINOGLYCAN_CATABOLIC_PROCESS	2.69934	0.0144973	Up
GOBP_PROTEOGLYCAN_METABOLIC_PROCESS	2.13322	0.0462029	Up
GOBP_CHITIN_METABOLIC_PROCESS	0.670989	0.509559	Not
GOBP_AMINO_SUGAR_METABOLIC_PROCESS	0.280404	0.782544	Not
GOBP_N_ACETYLGLUCOSAMINE_METABOLIC_PROCESS	1.61061	0.130825	Not
GOBP_UDP_N_ACETYLGLUCOSAMINE_METABOLIC_PROCESS	-0.321023	0.751983	Not
GOBP_UDP_N_ACETYLGLUCOSAMINE_BIOSYNTHETIC_PROCESS	-2.04603	0.0550477	Not
GOBP_N_ACETYLNEURAMINATE_METABOLIC_PROCESS	-1.6335	0.120116	Not
GOBP_URONIC_ACID_METABOLIC_PROCESS	-2.53447	0.0215023	Down
GOBP_ALCOHOL_METABOLIC_PROCESS	1.18749	0.249366	Not
GOBP_ETHANOL_METABOLIC_PROCESS	0.416574	0.682829	Not
GOBP_ETHANOL_CATABOLIC_PROCESS	0.130424	0.897709	Not
GOBP_ETHANOL_OXIDATION	0.710435	0.487339	Not
GOBP_GLYCEROL_3_PHOSPHATE_METABOLIC_PROCESS	-1.6441	0.115176	Not
GOBP_CELLULAR_GLUCAN_METABOLIC_PROCESS	-0.616971	0.547912	Not
GOBP_CELLULAR_ALDEHYDE_METABOLIC_PROCESS	1.17159	0.256354	Not
GOBP_ORGANIC_ACID_METABOLIC_PROCESS	-0.0464513	0.963587	Not
GOBP_ACETYL_COA_METABOLIC_PROCESS	-1.10458	0.28411	Not
GOBP_ACETYL_COA_BIOSYNTHETIC_PROCESS	-2.61325	0.0163189	Down
GOBP_ACETYL_COA_BIOSYNTHETIC_PROCESS_FROM_PYRUVATE	-3.0638	0.00629004	Down
GOBP_LACTATE_METABOLIC_PROCESS	-2.68365	0.0139482	Down
GOBP_PYRUVATE_METABOLIC_PROCESS	-0.525636	0.606145	Not
GOBP_GENERATION_OF_PRECURSOR_METABOLITES_AND_ENERGY	-1.49438	0.153846	Not
GOBP_TRICARBOXYLIC_ACID_CYCLE	-3.83955	0.00105325	Down
GOBP_CITRATE_METABOLIC_PROCESS	0.495252	0.625573	Not
GOBP_ISOCITRATE_METABOLIC_PROCESS	-0.747523	0.466889	Not
GOBP_2_OXOGLUTARATE_METABOLIC_PROCESS	-1.3174	0.208832	Not
GOBP_SUCCINYL_COA_METABOLIC_PROCESS	-3.50022	0.00382652	Down
GOBP_SUCCINATE_METABOLIC_PROCESS	-0.918521	0.369026	Not
GOBP_OXALOACETATE_METABOLIC_PROCESS	0.159821	0.874819	Not
GOBP_MALATE_METABOLIC_PROCESS	-1.27735	0.218176	Not
GOBP_REGULATION_OF_CARBOHYDRATE_METABOLIC_PROCESS	0.771497	0.449599	Not
GOBP_REGULATION_OF_GLYCOLYTIC_PROCESS	0.663087	0.514731	Not
GOBP_REGULATION_OF_GLUCONEOGENESIS	1.20138	0.242996	Not
GOBP_ENERGY_RESERVE_METABOLIC_PROCESS	-0.535043	0.60256	Not
GOBP_FERMENTATION	-0.323181	0.750992	Not
GOBP_NADH_OXIDATION	1.32738	0.211372	Not
GOBP_OXIDATIVE_PHOSPHORYLATION	-2.72769	0.0146317	Down
GOBP_MITOCHONDRIAL_ELECTRON_TRANSPORT_NADH_TO_UBIQUINONE	-2.51178	0.0219622	Down
GOBP_MITOCHONDRIAL_ELECTRON_TRANSPORT_SUCCINATE_TO_UBIQUINONE	-2.79772	0.0107906	Down
GOBP_MITOCHONDRIAL_ELECTRON_TRANSPORT_UBIQUINOL_TO_CYTOCHROME_C	-2.07362	0.0573127	Not
GOBP_MITOCHONDRIAL_ELECTRON_TRANSPORT_CYTOCHROME_C_TO_OXYGEN	-1.63964	0.119933	Not
GOBP_REGULATION_OF_NUCLEOTIDE_METABOLIC_PROCESS	0.869024	0.395439	Not
GOBP_PURINE_NUCLEOBASE_METABOLIC_PROCESS	-1.14637	0.270072	Not
GOBP_PURINE_NUCLEOSIDE_CATABOLIC_PROCESS	-3.98221	0.000965066	Down
GOBP_PURINE_RIBONUCLEOSIDE_SALVAGE	-2.99342	0.00923207	Down
GOBP_AMP_BIOSYNTHETIC_PROCESS	-1.49426	0.150008	Not
GOBP_CAMP_BIOSYNTHETIC_PROCESS	1.19977	0.244331	Not
GOBP_ADP_BIOSYNTHETIC_PROCESS	-0.40661	0.690556	Not
GOBP_GMP_BIOSYNTHETIC_PROCESS	-1.07758	0.293989	Not
GOBP_CGMP_BIOSYNTHETIC_PROCESS	1.27307	0.222164	Not
GOBP_GTP_BIOSYNTHETIC_PROCESS	-2.10583	0.0561941	Not
GOBP_IMP_BIOSYNTHETIC_PROCESS	0.286884	0.777024	Not
GOBP_PURINE_NUCLEOTIDE_CATABOLIC_PROCESS	-2.02919	0.058077	Not
GOBP_AMP_CATABOLIC_PROCESS	0.971525	0.348063	Not
GOBP_CAMP_CATABOLIC_PROCESS	-2.26724	0.0367332	Down
GOBP_IMP_CATABOLIC_PROCESS	-0.143111	0.887789	Not
GOBP_PYRIMIDINE_NUCLEOBASE_METABOLIC_PROCESS	0.128671	0.899358	Not
GOBP_DE_NOVO_PYRIMIDINE_NUCLEOBASE_BIOSYNTHETIC_PROCESS	0.510713	0.615395	Not
GOBP_PYRIMIDINE_NUCLEOBASE_CATABOLIC_PROCESS	-0.0340323	0.973389	Not
GOBP_PYRIMIDINE_NUCLEOSIDE_METABOLIC_PROCESS	-0.964934	0.349707	Not
GOBP_PYRIMIDINE_NUCLEOTIDE_METABOLIC_PROCESS	-3.61237	0.00229008	Down
GOBP_UTP_BIOSYNTHETIC_PROCESS	-1.24568	0.229678	Not
GOBP_PYRIMIDINE_NUCLEOTIDE_CATABOLIC_PROCESS	-1.9415	0.0671856	Not
GOBP_DCMP_CATABOLIC_PROCESS	-1.35405	0.194963	Not
GOBP_DNA_METABOLIC_PROCESS	-2.21793	0.0377555	Down
GOBP_DNA_REPLICATION	-2.08225	0.0506676	Not
GOBP_DNA_TEMPLATED_DNA_REPLICATION	-2.03122	0.0565666	Not
GOBP_MITOCHONDRIAL_DNA_REPLICATION	-1.70106	0.105615	Not
GOBP_DNA_TOPOLOGICAL_CHANGE	-0.403361	0.690919	Not
GOBP_DNA_LIGATION	-2.05619	0.0561379	Not
GOBP_DNA_UNWINDING_INVOLVED_IN_DNA_REPLICATION	-0.809783	0.429682	Not
GOBP_DNA_REPLICATION_SYNTHESIS_OF_RNA_PRIMER	-1.88357	0.0813567	Not
GOBP_DNA_REPLICATION_INITIATION	-1.76247	0.0950976	Not
GOBP_DNA_STRAND_ELONGATION_INVOLVED_IN_DNA_REPLICATION	-1.40442	0.184548	Not
GOBP_REGULATION_OF_DNA_REPLICATION	-2.34153	0.0301275	Down
GOBP_RNA_TEMPLATED_DNA_BIOSYNTHETIC_PROCESS	-1.24873	0.228343	Not
GOBP_DNA_REPAIR	-2.2093	0.0389656	Down
GOBP_REGULATION_OF_DNA_REPAIR	-0.858559	0.405014	Not
GOBP_TRANSCRIPTION_COUPLED_NUCLEOTIDE_EXCISION_REPAIR	-0.166899	0.869814	Not
GOBP_BASE_EXCISION_REPAIR	-0.948654	0.356955	Not
GOBP_BASE_EXCISION_REPAIR_AP_SITE_FORMATION	-0.50923	0.618997	Not
GOBP_BASE_EXCISION_REPAIR_GAP_FILLING	0.491116	0.629431	Not
GOBP_NUCLEOTIDE_EXCISION_REPAIR	0.982889	0.339418	Not
GOBP_PYRIMIDINE_DIMER_REPAIR	0.308613	0.761387	Not
GOBP_NUCLEOTIDE_EXCISION_REPAIR_DNA_GAP_FILLING	-0.761641	0.457294	Not
GOBP_MISMATCH_REPAIR	-2.58435	0.0175161	Down
GOBP_POSTREPLICATION_REPAIR	-3.15292	0.00499484	Down
GOBP_DOUBLE_STRAND_BREAK_REPAIR	-1.46781	0.157592	Not
GOBP_DOUBLE_STRAND_BREAK_REPAIR_VIA_NONHOMOLOGOUS_END_JOINING	-1.36134	0.187882	Not
GOBP_DNA_MODIFICATION	-1.22492	0.234179	Not
GOBP_DNA_METHYLATION	-0.463328	0.648311	Not
GOBP_DNA_DEALKYLATION_INVOLVED_IN_DNA_REPAIR	-1.51309	0.14652	Not
GOBP_DNA_CATABOLIC_PROCESS	0.686586	0.502556	Not
GOBP_APOPTOTIC_DNA_FRAGMENTATION	0.736066	0.471523	Not
GOBP_DNA_RECOMBINATION	-3.78492	0.00115104	Down
GOBP_MITOTIC_RECOMBINATION	-2.53207	0.0201238	Down
GOBP_CHROMATIN_ORGANIZATION	0.59863	0.557363	Not
GOBP_NUCLEOSOME_ASSEMBLY	-0.269736	0.790126	Not
GOBP_DNA_REPLICATION_DEPENDENT_CHROMATIN_ASSEMBLY	-0.2497	0.80577	Not
GOBP_CHROMATIN_REMODELING	0.470067	0.645256	Not
GOBP_DNA_METHYLATION_DEPENDENT_HETEROCHROMATIN_FORMATION	1.77072	0.091142	Not
GOBP_REGULATION_OF_GENE_EXPRESSION_BY_GENOMIC_IMPRINTING	-0.350667	0.729798	Not
GOBP_DNA_TEMPLATED_TRANSCRIPTION_INITIATION	-2.177	0.0413426	Down
GOBP_DNA_TEMPLATED_TRANSCRIPTION_TERMINATION	-1.87122	0.076	Not
GOBP_DNA_TEMPLATED_TRANSCRIPTION_ELONGATION	0.887867	0.384888	Not
GOBP_REGULATION_OF_TRANSCRIPTION_BY_RNA_POLYMERASE_I	0.263577	0.795351	Not
GOBP_REGULATION_OF_TRANSCRIPTION_BY_RNA_POLYMERASE_III	0.12346	0.903493	Not
GOBP_TRANSCRIPTION_BY_RNA_POLYMERASE_I	0.438535	0.667036	Not
GOBP_TRANSCRIPTION_INITIATION_AT_RNA_POLYMERASE_I_PROMOTER	2.12333	0.0462568	Up
GOBP_TRANSCRIPTION_INITIATION_AT_RNA_POLYMERASE_II_PROMOTER	-2.65014	0.0151071	Down
GOBP_TRANSCRIPTION_ELONGATION_BY_RNA_POLYMERASE_II_PROMOTER	-0.690601	0.497406	Not
GOBP_TERMINATION_OF_RNA_POLYMERASE_II_TRANSCRIPTION	0.033444	0.973637	Not
GOBP_MRNA_SPLICE_SITE_SELECTION	0.541288	0.595629	Not
GOBP_MRNA_CLEAVAGE	-0.966969	0.345881	Not
GOBP_ADENOSINE_TO_INOSINE_EDITING	0.423053	0.678018	Not
GOBP_TRANSCRIPTION_BY_RNA_POLYMERASE_III	-1.49466	0.151292	Not
GOBP_TRANSCRIPTION_INITIATION_AT_RNA_POLYMERASE_III_PROMOTER	-0.441933	0.664618	Not
GOBP_MITOCHONDRIAL_TRANSCRIPTION	-0.970155	0.346227	Not
GOBP_RNA_PROCESSING	-1.43608	0.166711	Not
GOBP_MRNA_PROCESSING	-1.18512	0.249519	Not
GOBP_MRNA_3_END_PROCESSING_BY_STEM_LOOP_BINDING_AND_CLEAVAGE	-1.36808	0.186056	Not
GOBP_TRNA_METABOLIC_PROCESS	-1.32592	0.200099	Not
GOBP_TRNA_MODIFICATION	-1.20334	0.243603	Not
GOBP_RNA_CATABOLIC_PROCESS	-1.03579	0.314977	Not
GOBP_MRNA_CATABOLIC_PROCESS	-0.522344	0.608899	Not
GOBP_RNA_LOCALIZATION	-1.42571	0.170555	Not
GOBP_RNA_EXPORT_FROM_NUCLEUS	-0.311725	0.758488	Not
GOBP_MRNA_EXPORT_FROM_NUCLEUS	-0.910191	0.373608	Not
GOBP_TRANSLATIONAL_INITIATION	-1.94992	0.0659101	Not
GOBP_TRANSLATIONAL_ELONGATION	-0.878902	0.391842	Not
GOBP_TRANSLATIONAL_TERMINATION	-2.05523	0.0615733	Not
GOBP_REGULATION_OF_TRANSLATIONAL_INITIATION	-0.655113	0.520726	Not
GOBP_REGULATION_OF_TRANSLATIONAL_ELONGATION	-1.90533	0.0761576	Not
GOBP_REGULATION_OF_TRANSLATIONAL_TERMINATION	-2.04746	0.0590336	Not
GOBP_REGULATION_OF_TRANSLATIONAL_FIDELITY	-1.18854	0.249418	Not
GOBP_TRANSLATIONAL_READTHROUGH	1.3694	0.188958	Not
GOBP_PROTEIN_FOLDING	-1.66549	0.111732	Not
GOBP_DE_NOVO_PROTEIN_FOLDING	-0.387439	0.703001	Not
GOBP_SIGNAL_PEPTIDE_PROCESSING	-0.192631	0.849385	Not
GOBP_PROTEIN_DEPHOSPHORYLATION	-1.91145	0.0706608	Not
GOBP_PROTEIN_ADP_RIBOSYLATION	0.520865	0.60931	Not
GOBP_PROTEIN_ACETYLATION	0.95552	0.356471	Not
GOBP_N_TERMINAL_PROTEIN_AMINO_ACID_ACETYLATION	1.2442	0.22744	Not
GOBP_PROTEIN_SULFATION	1.24705	0.228629	Not
GOBP_PROTEIN_METHYLATION	-0.138271	0.891358	Not
GOBP_PROTEIN_DEMETHYLATION	-0.17647	0.861717	Not
GOBP_PROTEIN_N_LINKED_GLYCOSYLATION	0.935048	0.362049	Not
GOBP_DOLICHYL_DIPHOSPHATE_BIOSYNTHETIC_PROCESS	-0.0450085	0.964597	Not
GOBP_OLIGOSACCHARIDE_LIPID_INTERMEDIATE_BIOSYNTHETIC_PROCESS	0.119775	0.905886	Not
GOBP_N_GLYCAN_PROCESSING	3.31601	0.00363993	Up
GOBP_PROTEIN_O_LINKED_GLYCOSYLATION	2.59202	0.0222002	Up
GOBP_N_TERMINAL_PROTEIN_LIPIDATION	0.543947	0.592771	Not
GOBP_C_TERMINAL_PROTEIN_LIPIDATION	-2.28076	0.0332552	Down
GOBP_GPI_ANCHOR_METABOLIC_PROCESS	0.945162	0.359279	Not
GOBP_PROTEOLYSIS	-0.193987	0.848057	Not
GOBP_MEMBRANE_PROTEIN_ECTODOMAIN_PROTEOLYSIS	1.29995	0.20932	Not
GOBP_PROTEIN_MONOUBIQUITINATION	-2.83541	0.00991461	Down
GOBP_PROTEIN_QUALITY_CONTROL_FOR_MISFOLDED_OR_INCOMPLETELY_SYNTHESIZED_PROTEINS	1.27244	0.218445	Not
GOBP_GLYCOPROTEIN_CATABOLIC_PROCESS	1.96105	0.0633197	Not
GOBP_PROTEIN_DEGLYCOSYLATION	1.33421	0.196825	Not
GOBP_PEPTIDE_METABOLIC_PROCESS	-1.90829	0.075797	Not
GOBP_CELLULAR_AMINO_ACID_METABOLIC_PROCESS	0.0685971	0.946281	Not
GOBP_REGULATION_OF_CELLULAR_AMINO_ACID_METABOLIC_PROCESS	0.466222	0.646045	Not
GOBP_ALANINE_CATABOLIC_PROCESS	0.805695	0.433428	Not
GOBP_ARGININE_METABOLIC_PROCESS	0.82312	0.421498	Not
GOBP_ARGININE_BIOSYNTHETIC_PROCESS	1.02568	0.317816	Not
GOBP_ARGININE_CATABOLIC_PROCESS	0.818186	0.422538	Not
GOBP_ASPARAGINE_METABOLIC_PROCESS	0.485719	0.63415	Not
GOBP_ASPARTATE_METABOLIC_PROCESS	0.579744	0.570553	Not
GOBP_CYSTEINE_METABOLIC_PROCESS	2.53278	0.0196535	Up
GOBP_GLUTAMATE_METABOLIC_PROCESS	1.07607	0.299161	Not
GOBP_GLUTAMATE_BIOSYNTHETIC_PROCESS	0.0468398	0.963218	Not
GOBP_GLUTAMATE_CATABOLIC_PROCESS	0.387283	0.704365	Not
GOBP_GLUTAMINE_METABOLIC_PROCESS	0.0898487	0.929346	Not
GOBP_GLYCINE_METABOLIC_PROCESS	-0.510385	0.618235	Not
GOBP_GLYCINE_BIOSYNTHETIC_PROCESS	-0.0467816	0.963347	Not
GOBP_HISTIDINE_METABOLIC_PROCESS	1.01977	0.319487	Not
GOBP_HISTIDINE_CATABOLIC_PROCESS	0.481054	0.635455	Not
GOBP_ISOLEUCINE_METABOLIC_PROCESS	-1.18142	0.254163	Not
GOBP_LEUCINE_METABOLIC_PROCESS	-0.634347	0.536025	Not
GOBP_LEUCINE_CATABOLIC_PROCESS	0.398451	0.696518	Not
GOBP_LYSINE_METABOLIC_PROCESS	0.584872	0.567164	Not
GOBP_METHIONINE_METABOLIC_PROCESS	-0.934067	0.362651	Not
GOBP_L_PHENYLALANINE_METABOLIC_PROCESS	-0.0866127	0.93238	Not
GOBP_PROLINE_METABOLIC_PROCESS	1.59108	0.136326	Not
GOBP_L_SERINE_METABOLIC_PROCESS	-0.783044	0.445599	Not
GOBP_L_SERINE_BIOSYNTHETIC_PROCESS	-0.919506	0.371495	Not
GOBP_L_SERINE_CATABOLIC_PROCESS	-0.244245	0.810333	Not
GOBP_THREONINE_METABOLIC_PROCESS	-1.78032	0.0983788	Not
GOBP_THREONINE_CATABOLIC_PROCESS	-1.34409	0.202965	Not
GOBP_TRYPTOPHAN_METABOLIC_PROCESS	-0.929672	0.364249	Not
GOBP_TRYPTOPHAN_CATABOLIC_PROCESS	-2.39144	0.0271934	Down
GOBP_TYROSINE_METABOLIC_PROCESS	-0.193972	0.848749	Not
GOBP_TYROSINE_CATABOLIC_PROCESS	-0.328388	0.7483	Not
GOBP_VALINE_METABOLIC_PROCESS	-1.15975	0.261691	Not
GOBP_CELLULAR_MODIFIED_AMINO_ACID_METABOLIC_PROCESS	0.646546	0.525143	Not
GOBP_CELLULAR_BIOGENIC_AMINE_METABOLIC_PROCESS	-0.588034	0.56287	Not
GOBP_AMINO_ACID_BETAINE_METABOLIC_PROCESS	1.32903	0.199712	Not
GOBP_AMINO_ACID_BETAINE_BIOSYNTHETIC_PROCESS	-0.544918	0.592045	Not
GOBP_INDOLALKYLAMINE_METABOLIC_PROCESS	-0.927259	0.365807	Not
GOBP_THYROID_HORMONE_GENERATION	0.766858	0.452707	Not
GOBP_ORNITHINE_METABOLIC_PROCESS	0.843802	0.40856	Not
GOBP_POLYAMINE_METABOLIC_PROCESS	0.105203	0.917515	Not
GOBP_POLYAMINE_BIOSYNTHETIC_PROCESS	-1.64991	0.118533	Not
GOBP_PHOSPHAGEN_METABOLIC_PROCESS	-0.563252	0.580032	Not
GOBP_PROTEIN_TARGETING	-0.488902	0.631839	Not
GOBP_NLS_BEARING_PROTEIN_IMPORT_INTO_NUCLEUS	-0.842181	0.409799	Not
GOBP_PROTEIN_EXPORT_FROM_NUCLEUS	0.501661	0.621491	Not
GOBP_PROTEIN_TARGETING_TO_MEMBRANE	0.444275	0.66302	Not
GOBP_COTRANSLATIONAL_PROTEIN_TARGETING_TO_MEMBRANE	0.55884	0.583171	Not
GOBP_SRP_DEPENDENT_COTRANSLATIONAL_PROTEIN_TARGETING_TO_MEMBRANE	0.0782818	0.93847	Not
GOBP_SRP_DEPENDENT_COTRANSLATIONAL_PROTEIN_TARGETING_TO_MEMBRANE_TRANSLOCATION	1.1867	0.251175	Not
GOBP_SRP_DEPENDENT_COTRANSLATIONAL_PROTEIN_TARGETING_TO_MEMBRANE_SIGNAL_SEQUENCE_RECOGNITION	-0.897523	0.381292	Not
GOBP_POST_TRANSLATIONAL_PROTEIN_TARGETING_TO_ENDOPLASMIC_RETICULUM_MEMBRANE	1.44042	0.168592	Not
GOBP_PROTEIN_RETENTION_IN_ER_LUMEN	1.69062	0.108006	Not
GOBP_PROTEIN_TARGETING_TO_LYSOSOME	-0.0344194	0.972903	Not
GOBP_PROTEIN_TARGETING_TO_VACUOLE	1.64174	0.115541	Not
GOBP_PROTEIN_TARGETING_TO_PEROXISOME	-2.16722	0.0460368	Down
GOBP_PROTEIN_TARGETING_TO_MITOCHONDRION	-1.5036	0.152855	Not
GOBP_PROTEIN_PROCESSING_INVOLVED_IN_PROTEIN_TARGETING_TO_MITOCHONDRION	-1.93275	0.0678002	Not
GOBP_LIPID_METABOLIC_PROCESS	1.3881	0.180031	Not
GOBP_FATTY_ACID_METABOLIC_PROCESS	1.08862	0.29129	Not
GOBP_FATTY_ACID_BIOSYNTHETIC_PROCESS	1.11586	0.280591	Not
GOBP_FATTY_ACID_BETA_OXIDATION	-0.351311	0.73016	Not
GOBP_UNSATURATED_FATTY_ACID_BIOSYNTHETIC_PROCESS	0.130634	0.897593	Not
GOBP_NEUTRAL_LIPID_METABOLIC_PROCESS	1.04017	0.310118	Not
GOBP_MONOACYLGLYCEROL_BIOSYNTHETIC_PROCESS	-1.70988	0.109851	Not
GOBP_TRIGLYCERIDE_METABOLIC_PROCESS	0.483469	0.633771	Not
GOBP_MEMBRANE_LIPID_METABOLIC_PROCESS	2.08813	0.0520023	Not
GOBP_PHOSPHOLIPID_METABOLIC_PROCESS	0.610343	0.548554	Not
GOBP_PHOSPHATIDYLETHANOLAMINE_BIOSYNTHETIC_PROCESS	0.624185	0.539295	Not
GOBP_GLYCEROPHOSPHOLIPID_METABOLIC_PROCESS	0.97665	0.340313	Not
GOBP_DIACYLGLYCEROL_BIOSYNTHETIC_PROCESS	-0.518983	0.613147	Not
GOBP_PHOSPHATIDYLGLYCEROL_BIOSYNTHETIC_PROCESS	2.4024	0.0303997	Up
GOBP_PHOSPHATIDYLCHOLINE_BIOSYNTHETIC_PROCESS	0.763099	0.45417	Not
GOBP_CDP_CHOLINE_PATHWAY	-0.413506	0.683437	Not
GOBP_PHOSPHATIDYLSERINE_METABOLIC_PROCESS	0.994031	0.331718	Not
GOBP_PHOSPHATIDYLINOSITOL_BIOSYNTHETIC_PROCESS	0.581599	0.567616	Not
GOBP_GLYCEROL_ETHER_METABOLIC_PROCESS	-1.78771	0.0959923	Not
GOBP_SPHINGOLIPID_METABOLIC_PROCESS	2.6676	0.0159674	Up
GOBP_CERAMIDE_METABOLIC_PROCESS	1.38684	0.185079	Not
GOBP_GLYCOSYLCERAMIDE_METABOLIC_PROCESS	1.39746	0.183263	Not
GOBP_GLUCOSYLCERAMIDE_METABOLIC_PROCESS	3.31275	0.00434572	Up
GOBP_SPHINGOMYELIN_METABOLIC_PROCESS	0.25544	0.800976	Not
GOBP_SPHINGOMYELIN_CATABOLIC_PROCESS	0.365544	0.718893	Not
GOBP_SPHINGOMYELIN_BIOSYNTHETIC_PROCESS	-0.264088	0.794388	Not
GOBP_GLYCOSPHINGOLIPID_METABOLIC_PROCESS	1.94718	0.0711193	Not
GOBP_GLYCOSPHINGOLIPID_BIOSYNTHETIC_PROCESS	1.70386	0.109229	Not
GOBP_GANGLIOSIDE_CATABOLIC_PROCESS	1.49148	0.157624	Not
GOBP_ICOSANOID_METABOLIC_PROCESS	0.798182	0.43535	Not
GOBP_LEUKOTRIENE_METABOLIC_PROCESS	0.589625	0.562026	Not
GOBP_PROSTANOID_METABOLIC_PROCESS	-0.0957021	0.924687	Not
GOBP_STEROID_BIOSYNTHETIC_PROCESS	1.61944	0.120635	Not
GOBP_BILE_ACID_BIOSYNTHETIC_PROCESS	-0.110828	0.912844	Not
GOBP_C21_STEROID_HORMONE_BIOSYNTHETIC_PROCESS	1.48119	0.153695	Not
GOBP_PROGESTERONE_BIOSYNTHETIC_PROCESS	0.37875	0.709848	Not
GOBP_ANDROGEN_BIOSYNTHETIC_PROCESS	0.306823	0.762691	Not
GOBP_ESTROGEN_BIOSYNTHETIC_PROCESS	0.880134	0.388804	Not
GOBP_GLUCOCORTICOID_BIOSYNTHETIC_PROCESS	3.64645	0.00151313	Up
GOBP_MINERALOCORTICOID_BIOSYNTHETIC_PROCESS	1.67779	0.110662	Not
GOBP_STEROID_CATABOLIC_PROCESS	0.502237	0.621411	Not
GOBP_CHOLESTEROL_CATABOLIC_PROCESS	1.33799	0.195242	Not
GOBP_ANDROGEN_CATABOLIC_PROCESS	-2.00387	0.0582297	Not
GOBP_ISOPRENOID_METABOLIC_PROCESS	1.41153	0.176744	Not
GOBP_TERPENOID_METABOLIC_PROCESS	1.08276	0.295173	Not
GOBP_ONE_CARBON_METABOLIC_PROCESS	1.47937	0.154391	Not
GOBP_NADH_METABOLIC_PROCESS	0.958817	0.350496	Not
GOBP_NADH_REGENERATION	1.23541	0.231304	Not
GOBP_NADP_METABOLIC_PROCESS	-0.769183	0.45045	Not
GOBP_NADPH_REGENERATION	-0.0989585	0.922321	Not
GOBP_UBIQUINONE_METABOLIC_PROCESS	-0.175656	0.863018	Not
GOBP_GLUTATHIONE_METABOLIC_PROCESS	-0.103972	0.918598	Not
GOBP_GLUTATHIONE_CATABOLIC_PROCESS	-0.994086	0.338484	Not
GOBP_ATP_BIOSYNTHETIC_PROCESS	-1.8175	0.0897772	Not
GOBP_FOLIC_ACID_CONTAINING_COMPOUND_METABOLIC_PROCESS	-0.453453	0.656418	Not
GOBP_VITAMIN_METABOLIC_PROCESS	-0.24031	0.81254	Not
GOBP_WATER_SOLUBLE_VITAMIN_METABOLIC_PROCESS	-1.686	0.10883	Not
GOBP_RIBOFLAVIN_METABOLIC_PROCESS	-0.240529	0.812661	Not
GOBP_FAT_SOLUBLE_VITAMIN_METABOLIC_PROCESS	0.853172	0.405421	Not
GOBP_VITAMIN_A_METABOLIC_PROCESS	-0.152961	0.879889	Not
GOBP_PORPHYRIN_CONTAINING_COMPOUND_METABOLIC_PROCESS	0.898723	0.379019	Not
GOBP_PROTOPORPHYRINOGEN_IX_BIOSYNTHETIC_PROCESS	1.29058	0.211091	Not
GOBP_SULFUR_COMPOUND_METABOLIC_PROCESS	0.260116	0.797679	Not
GOBP_SUPEROXIDE_METABOLIC_PROCESS	-0.503064	0.620238	Not
GOBP_XENOBIOTIC_METABOLIC_PROCESS	1.41484	0.172078	Not
GOBP_ION_TRANSPORT	1.91825	0.0700633	Not
GOBP_CATION_TRANSPORT	2.07691	0.050964	Not
GOBP_POTASSIUM_ION_TRANSPORT	1.34412	0.196688	Not
GOBP_SODIUM_ION_TRANSPORT	3.29549	0.00347365	Up
GOBP_CALCIUM_ION_TRANSPORT	1.19806	0.24481	Not
GOBP_PHOSPHATE_ION_TRANSPORT	0.800333	0.432845	Not
GOBP_ANION_TRANSPORT	1.41692	0.171184	Not
GOBP_CHLORIDE_TRANSPORT	1.83792	0.0865844	Not
GOBP_COBALT_ION_TRANSPORT	-0.150672	0.882415	Not
GOBP_COPPER_ION_TRANSPORT	0.098656	0.922708	Not
GOBP_IRON_ION_TRANSPORT	1.41706	0.171249	Not
GOBP_MANGANESE_ION_TRANSPORT	-0.204218	0.840209	Not
GOBP_ZINC_ION_TRANSPORT	-0.503723	0.62	Not
GOBP_WATER_TRANSPORT	-0.544967	0.591544	Not
GOBP_DICARBOXYLIC_ACID_TRANSPORT	0.693044	0.499321	Not
GOBP_NEUROTRANSMITTER_TRANSPORT	0.916097	0.370698	Not
GOBP_SEROTONIN_TRANSPORT	5.35212	0.000108407	Up
GOBP_MITOCHONDRIAL_TRANSPORT	-1.96037	0.0685084	Not
GOBP_MITOCHONDRIAL_CALCIUM_ION_TRANSMEMBRANE_TRANSPORT	-0.157679	0.876898	Not
GOBP_XENOBIOTIC_TRANSMEMBRANE_TRANSPORT	0.315475	0.756196	Not
GOBP_OLIGOPEPTIDE_TRANSPORT	3.32314	0.00323678	Up
GOBP_EXTRACELLULAR_TRANSPORT	-0.0696647	0.945257	Not
GOBP_NUCLEOTIDE_TRANSPORT	0.426336	0.674999	Not
GOBP_AMINO_ACID_TRANSPORT	0.94259	0.357443	Not
GOBP_GLUTAMINE_TRANSPORT	1.79616	0.0900134	Not
GOBP_CELLULAR_ION_HOMEOSTASIS	1.31523	0.203546	Not
GOBP_CELLULAR_METAL_ION_HOMEOSTASIS	1.32058	0.200976	Not
GOBP_CELLULAR_COPPER_ION_HOMEOSTASIS	3.32852	0.00319142	Up
GOBP_CELLULAR_IRON_ION_HOMEOSTASIS	-0.0528793	0.958354	Not
GOBP_CELLULAR_SODIUM_ION_HOMEOSTASIS	0.349172	0.73211	Not
GOBP_CELL_VOLUME_HOMEOSTASIS	2.02219	0.0580689	Not
GOBP_REGULATION_OF_PH	0.569959	0.575876	Not
GOBP_INTRACELLULAR_PROTEIN_TRANSPORT	-0.306508	0.763095	Not
GOBP_EXOCYTOSIS	-0.547693	0.591035	Not
GOBP_ENDOPLASMIC_RETICULUM_TO_GOLGI_VESICLE_MEDIATED_TRANSPORT	0.114224	0.910373	Not
GOBP_RETROGRADE_VESICLE_MEDIATED_TRANSPORT_GOLGI_TO_ENDOPLASMIC_RETICULUM	0.948063	0.359384	Not
GOBP_INTRA_GOLGI_VESICLE_MEDIATED_TRANSPORT	-1.10695	0.2846	Not
GOBP_POST_GOLGI_VESICLE_MEDIATED_TRANSPORT	0.370825	0.716613	Not
GOBP_GOLGI_TO_PLASMA_MEMBRANE_TRANSPORT	0.464175	0.649531	Not
GOBP_GOLGI_TO_ENDOSOME_TRANSPORT	0.735315	0.474959	Not
GOBP_GOLGI_TO_VACUOLE_TRANSPORT	-0.242016	0.811152	Not
GOBP_ENDOCYTOSIS	0.673424	0.508022	Not
GOBP_RECEPTOR_MEDIATED_ENDOCYTOSIS	0.86443	0.397464	Not
GOBP_VESICLE_BUDDING_FROM_MEMBRANE	-0.212475	0.834432	Not
GOBP_VESICLE_COATING	0.222384	0.826424	Not
GOBP_VESICLE_TARGETING	0.0549509	0.956829	Not
GOBP_VESICLE_DOCKING_INVOLVED_IN_EXOCYTOSIS	-0.805634	0.430682	Not
GOBP_PINOCYTOSIS	-0.688078	0.498952	Not
GOBP_PHAGOCYTOSIS	-1.35483	0.191961	Not
GOBP_PHAGOCYTOSIS_RECOGNITION	-0.88645	0.386152	Not
GOBP_APOPTOTIC_PROCESS	-0.021976	0.982678	Not
GOBP_ACTIVATION_OF_CYSTEINE_TYPE_ENDOPEPTIDASE_ACTIVITY_INVOLVED_IN_APOPTOTIC_PROCESS	-1.63688	0.11672	Not
GOBP_CELLULAR_COMPONENT_DISASSEMBLY_INVOLVED_IN_EXECUTION_PHASE_OF_APOPTOSIS	1.14802	0.271535	Not
GOBP_ACTIVATION_INDUCED_CELL_DEATH_OF_T_CELLS	-2.151	0.0470358	Down
GOBP_INFLAMMATORY_CELL_APOPTOTIC_PROCESS	-1.76315	0.0933166	Not
GOBP_SUBSTRATE_DEPENDENT_CELL_MIGRATION	-2.50546	0.0206646	Down
GOBP_SUBSTRATE_DEPENDENT_CELL_MIGRATION_CELL_EXTENSION	-3.14409	0.0052611	Down
GOBP_MUSCLE_CONTRACTION	0.116503	0.90879	Not
GOBP_REGULATION_OF_MUSCLE_CONTRACTION	0.567289	0.577946	Not
GOBP_SMOOTH_MUSCLE_CONTRACTION	-0.424353	0.677894	Not
GOBP_REGULATION_OF_SMOOTH_MUSCLE_CONTRACTION	0.211565	0.835669	Not
GOBP_STRIATED_MUSCLE_CONTRACTION	1.28208	0.21619	Not
GOBP_REGULATION_OF_STRIATED_MUSCLE_CONTRACTION	0.791767	0.439769	Not
GOBP_SYNCYTIUM_FORMATION	1.30015	0.207886	Not
GOBP_DEFENSE_RESPONSE	-0.303739	0.76468	Not
GOBP_ACUTE_PHASE_RESPONSE	0.168205	0.868115	Not
GOBP_INFLAMMATORY_RESPONSE	-0.617744	0.543935	Not
GOBP_IMMUNE_RESPONSE	-0.69041	0.498905	Not
GOBP_COMPLEMENT_ACTIVATION	-0.252599	0.803041	Not
GOBP_COMPLEMENT_ACTIVATION_ALTERNATIVE_PATHWAY	-0.515087	0.612636	Not
GOBP_HUMORAL_IMMUNE_RESPONSE	0.0496634	0.960881	Not
GOBP_CELLULAR_DEFENSE_RESPONSE	-0.638446	0.530945	Not
GOBP_RESPONSE_TO_OSMOTIC_STRESS	1.31314	0.205853	Not
GOBP_HYPOTONIC_RESPONSE	0.905132	0.377379	Not
GOBP_HYPEROSMOTIC_RESPONSE	2.34981	0.0300803	Up
GOBP_CELLULAR_RESPONSE_TO_DNA_DAMAGE_STIMULUS	-1.97267	0.063273	Not
GOBP_DNA_DAMAGE_INDUCED_PROTEIN_PHOSPHORYLATION	-0.767879	0.457802	Not
GOBP_DNA_DAMAGE_RESPONSE_SIGNAL_TRANSDUCTION_BY_P53_CLASS_MEDIATOR_RESULTING_IN_CELL_CYCLE_ARREST	-0.521833	0.609973	Not
GOBP_RESPONSE_TO_OXIDATIVE_STRESS	-0.319174	0.753209	Not
GOBP_ER_OVERLOAD_RESPONSE	-0.274598	0.786703	Not
GOBP_ER_NUCLEUS_SIGNALING_PATHWAY	1.35256	0.190666	Not
GOBP_RESPONSE_TO_STEROL_DEPLETION	1.23798	0.230018	Not
GOBP_CELLULAR_RESPONSE_TO_NITROGEN_STARVATION	-1.6396	0.117486	Not
GOBP_NUCLEUS_ORGANIZATION	-0.833677	0.414112	Not
GOBP_NUCLEAR_ENVELOPE_ORGANIZATION	0.262079	0.795916	Not
GOBP_NUCLEAR_PORE_ORGANIZATION	-0.234049	0.817687	Not
GOBP_NUCLEOLUS_ORGANIZATION	-2.11193	0.0483074	Down
GOBP_MITOCHONDRION_ORGANIZATION	-2.64387	0.019795	Down
GOBP_MITOCHONDRIAL_MEMBRANE_ORGANIZATION	-1.94704	0.0730481	Not
GOBP_INNER_MITOCHONDRIAL_MEMBRANE_ORGANIZATION	-1.7213	0.108219	Not
GOBP_OUTER_MITOCHONDRIAL_MEMBRANE_ORGANIZATION	-2.34285	0.0345199	Down
GOBP_PLASMA_MEMBRANE_ORGANIZATION	-0.463398	0.647908	Not
GOBP_CYTOSKELETON_ORGANIZATION	0.314369	0.757342	Not
GOBP_ACTIN_FILAMENT_ORGANIZATION	0.247164	0.807182	Not
GOBP_MICROTUBULE_BASED_PROCESS	-0.861744	0.399363	Not
GOBP_MICROTUBULE_BASED_MOVEMENT	-0.211913	0.834221	Not
GOBP_MICROTUBULE_DEPOLYMERIZATION	0.492333	0.628289	Not
GOBP_MICROTUBULE_NUCLEATION	-2.18042	0.0463145	Down
GOBP_TUBULIN_COMPLEX_ASSEMBLY	-2.35308	0.0328058	Down
GOBP_POST_CHAPERONIN_TUBULIN_FOLDING_PATHWAY	-1.68773	0.107873	Not
GOBP_CYTOPLASM_ORGANIZATION	1.95566	0.0641493	Not
GOBP_ENDOPLASMIC_RETICULUM_ORGANIZATION	0.583895	0.566132	Not
GOBP_GOLGI_ORGANIZATION	-0.30401	0.764472	Not
GOBP_PEROXISOME_ORGANIZATION	-2.03388	0.0555668	Not
GOBP_ENDOSOME_ORGANIZATION	-0.815259	0.425537	Not
GOBP_VACUOLE_ORGANIZATION	-1.15606	0.261536	Not
GOBP_VACUOLAR_TRANSPORT	0.229819	0.820593	Not
GOBP_VACUOLAR_ACIDIFICATION	0.534145	0.599261	Not
GOBP_PROTEIN_CATABOLIC_PROCESS_IN_THE_VACUOLE	2.26623	0.0344657	Up
GOBP_LYSOSOMAL_TRANSPORT	0.590498	0.561396	Not
GOBP_LYSOSOMAL_LUMEN_ACIDIFICATION	0.648282	0.523978	Not
GOBP_CELL_CELL_JUNCTION_ASSEMBLY	1.50776	0.151322	Not
GOBP_CELL_CYCLE	-1.79569	0.094378	Not
GOBP_SPINDLE_ORGANIZATION	-2.06874	0.0622569	Not
GOBP_MITOTIC_SPINDLE_ORGANIZATION	-1.76162	0.108201	Not
GOBP_SPINDLE_ASSEMBLY_INVOLVED_IN_FEMALE_MEIOSIS	-1.7061	0.106479	Not
GOBP_CHROMOSOME_SEGREGATION	-3.18363	0.00559583	Down
GOBP_SISTER_CHROMATID_COHESION	-2.11023	0.0491123	Down
GOBP_REGULATION_OF_SISTER_CHROMATID_COHESION	-1.94913	0.0647629	Not
GOBP_MITOTIC_SISTER_CHROMATID_COHESION	-1.75469	0.094969	Not
GOBP_MITOTIC_CHROMOSOME_CONDENSATION	0.275139	0.787293	Not
GOBP_MITOTIC_NUCLEAR_MEMBRANE_DISASSEMBLY	0.940513	0.360723	Not
GOBP_MITOTIC_METAPHASE_PLATE_CONGRESSION	-4.03979	0.000591561	Down
GOBP_REGULATION_OF_MITOTIC_NUCLEAR_DIVISION	-3.51117	0.00329618	Down
GOBP_MITOTIC_CELL_CYCLE_CHECKPOINT_SIGNALING	-3.2698	0.00475189	Down
GOBP_MITOTIC_G2_DNA_DAMAGE_CHECKPOINT_SIGNALING	-1.50078	0.148388	Not
GOBP_REGULATION_OF_EXIT_FROM_MITOSIS	-2.03142	0.0579131	Not
GOBP_HOMOLOGOUS_CHROMOSOME_PAIRING_AT_MEIOSIS	-1.52977	0.146901	Not
GOBP_MALE_MEIOTIC_NUCLEAR_DIVISION	-2.60906	0.016562	Down
GOBP_MALE_MEIOSIS_I	-1.06582	0.301053	Not
GOBP_FEMALE_MEIOTIC_NUCLEAR_DIVISION	-0.782187	0.446011	Not
GOBP_FEMALE_MEIOSIS_I	-0.934196	0.363891	Not
GOBP_CELL_ADHESION	1.51167	0.145679	Not
GOBP_HOMOPHILIC_CELL_ADHESION_VIA_PLASMA_MEMBRANE_ADHESION_MOLECULES	3.6601	0.00224001	Up
GOBP_HETEROPHILIC_CELL_CELL_ADHESION_VIA_PLASMA_MEMBRANE_CELL_ADHESION_MOLECULES	2.25316	0.0385791	Up
GOBP_NEURON_CELL_CELL_ADHESION	0.617925	0.544795	Not
GOBP_LEUKOCYTE_CELL_CELL_ADHESION	-0.195776	0.84675	Not
GOBP_CELL_MATRIX_ADHESION	1.17389	0.253611	Not
GOBP_NEGATIVE_REGULATION_OF_CELL_ADHESION	0.715383	0.482333	Not
GOBP_ESTABLISHMENT_OR_MAINTENANCE_OF_CELL_POLARITY	1.19394	0.246173	Not
GOBP_ESTABLISHMENT_OF_TISSUE_POLARITY	1.81896	0.083294	Not
GOBP_ENZYME_LINKED_RECEPTOR_PROTEIN_SIGNALING_PATHWAY	1.87489	0.0766565	Not
GOBP_RECEPTOR_GUANYLYL_CYCLASE_SIGNALING_PATHWAY	0.83199	0.417367	Not
GOBP_TRANSMEMBRANE_RECEPTOR_PROTEIN_TYROSINE_KINASE_SIGNALING_PATHWAY	1.09885	0.285622	Not
GOBP_ACTIVATION_OF_TRANSMEMBRANE_RECEPTOR_PROTEIN_TYROSINE_KINASE_ACTIVITY	0.0154303	0.987958	Not
GOBP_SIGNAL_COMPLEX_ASSEMBLY	0.0454169	0.964298	Not
GOBP_NEGATIVE_REGULATION_OF_EPIDERMAL_GROWTH_FACTOR_ACTIVATED_RECEPTOR_ACTIVITY	-0.389434	0.701451	Not
GOBP_REGULATION_OF_EPIDERMAL_GROWTH_FACTOR_ACTIVATED_RECEPTOR_ACTIVITY	0.834611	0.413464	Not
GOBP_TRANSMEMBRANE_RECEPTOR_PROTEIN_SERINE_THREONINE_KINASE_SIGNALING_PATHWAY	2.72397	0.0129865	Up
GOBP_TRANSFORMING_GROWTH_FACTOR_BETA_RECEPTOR_SIGNALING_PATHWAY	1.74342	0.0978723	Not
GOBP_COMMON_PARTNER_SMAD_PROTEIN_PHOSPHORYLATION	0.85643	0.401708	Not
GOBP_SMAD_PROTEIN_COMPLEX_ASSEMBLY	0.637487	0.530703	Not
GOBP_TRANSMEMBRANE_RECEPTOR_PROTEIN_TYROSINE_PHOSPHATASE_SIGNALING_PATHWAY	0.630586	0.537848	Not
GOBP_G_PROTEIN_COUPLED_RECEPTOR_SIGNALING_PATHWAY	0.813888	0.425287	Not
GOBP_G_PROTEIN_COUPLED_RECEPTOR_SIGNALING_PATHWAY_COUPLED_TO_CYCLIC_NUCLEOTIDE_SECOND_MESSENGER	-0.66473	0.514552	Not
GOBP_ADENYLATE_CYCLASE_MODULATING_G_PROTEIN_COUPLED_RECEPTOR_SIGNALING_PATHWAY	0.940763	0.36025	Not
GOBP_ADENYLATE_CYCLASE_ACTIVATING_G_PROTEIN_COUPLED_RECEPTOR_SIGNALING_PATHWAY	0.9626	0.348809	Not
GOBP_ACTIVATION_OF_ADENYLATE_CYCLASE_ACTIVITY	1.084	0.29139	Not
GOBP_ADENYLATE_CYCLASE_ACTIVATING_DOPAMINE_RECEPTOR_SIGNALING_PATHWAY	1.84465	0.0814689	Not
GOBP_ADENYLATE_CYCLASE_INHIBITING_G_PROTEIN_COUPLED_RECEPTOR_SIGNALING_PATHWAY	1.38407	0.185678	Not
GOBP_NEGATIVE_REGULATION_OF_ADENYLATE_CYCLASE_ACTIVITY	1.43303	0.175205	Not
GOBP_ADENYLATE_CYCLASE_INHIBITING_DOPAMINE_RECEPTOR_SIGNALING_PATHWAY	-0.338572	0.740057	Not
GOBP_ADENYLATE_CYCLASE_INHIBITING_G_PROTEIN_COUPLED_GLUTAMATE_RECEPTOR_SIGNALING_PATHWAY	3.35947	0.00301406	Up
GOBP_ADENYLATE_CYCLASE_INHIBITING_G_PROTEIN_COUPLED_ACETYLCHOLINE_RECEPTOR_SIGNALING_PATHWAY	1.01162	0.323814	Not
GOBP_ADENYLATE_CYCLASE_INHIBITING_SEROTONIN_RECEPTOR_SIGNALING_PATHWAY	-0.523419	0.60788	Not
GOBP_PHOSPHOLIPASE_C_ACTIVATING_G_PROTEIN_COUPLED_RECEPTOR_SIGNALING_PATHWAY	0.199353	0.844113	Not
GOBP_ACTIVATION_OF_PHOSPHOLIPASE_C_ACTIVITY	-1.17827	0.255552	Not
GOBP_POSITIVE_REGULATION_OF_CYTOSOLIC_CALCIUM_ION_CONCENTRATION	0.0434619	0.965773	Not
GOBP_PROTEIN_KINASE_C_ACTIVATING_G_PROTEIN_COUPLED_RECEPTOR_SIGNALING_PATHWAY	1.78025	0.094698	Not
GOBP_SEROTONIN_RECEPTOR_SIGNALING_PATHWAY	-0.0534282	0.957994	Not
GOBP_DOPAMINE_RECEPTOR_SIGNALING_PATHWAY	0.300921	0.767546	Not
GOBP_G_PROTEIN_COUPLED_ACETYLCHOLINE_RECEPTOR_SIGNALING_PATHWAY	1.65482	0.113765	Not
GOBP_GAMMA_AMINOBUTYRIC_ACID_SIGNALING_PATHWAY	1.7595	0.0986882	Not
GOBP_GLUTAMATE_RECEPTOR_SIGNALING_PATHWAY	2.94014	0.00805042	Up
GOBP_G_PROTEIN_COUPLED_GLUTAMATE_RECEPTOR_SIGNALING_PATHWAY	2.48874	0.0216027	Up
GOBP_TACHYKININ_RECEPTOR_SIGNALING_PATHWAY	1.66514	0.122895	Not
GOBP_NEUROPEPTIDE_SIGNALING_PATHWAY	0.975073	0.345778	Not
GOBP_NOTCH_SIGNALING_PATHWAY	1.9672	0.0648412	Not
GOBP_NOTCH_RECEPTOR_PROCESSING	1.46853	0.157416	Not
GOBP_POSITIVE_REGULATION_OF_TRANSCRIPTION_OF_NOTCH_RECEPTOR_TARGET	0.323769	0.750731	Not
GOBP_WNT_SIGNALING_PATHWAY_CALCIUM_MODULATING_PATHWAY	1.31913	0.201329	Not
GOBP_SMOOTHENED_SIGNALING_PATHWAY	1.29105	0.210942	Not
GOBP_INTEGRIN_MEDIATED_SIGNALING_PATHWAY	0.945471	0.355766	Not
GOBP_OSMOSENSORY_SIGNALING_PATHWAY	0.0180946	0.985735	Not
GOBP_I_KAPPAB_KINASE_NF_KAPPAB_SIGNALING	-0.902833	0.377189	Not
GOBP_ACTIVATION_OF_NF_KAPPAB_INDUCING_KINASE_ACTIVITY	-0.376985	0.71089	Not
GOBP_I_KAPPAB_PHOSPHORYLATION	-0.355713	0.725831	Not
GOBP_CYTOPLASMIC_SEQUESTERING_OF_NF_KAPPAB	-1.26021	0.226668	Not
GOBP_JNK_CASCADE	-0.496439	0.627407	Not
GOBP_TYROSINE_PHOSPHORYLATION_OF_STAT_PROTEIN	-0.378162	0.70978	Not
GOBP_NITRIC_OXIDE_MEDIATED_SIGNAL_TRANSDUCTION	0.488904	0.630641	Not
GOBP_SMALL_GTPASE_MEDIATED_SIGNAL_TRANSDUCTION	0.244055	0.809663	Not
GOBP_RAS_PROTEIN_SIGNAL_TRANSDUCTION	0.13558	0.893496	Not
GOBP_RHO_PROTEIN_SIGNAL_TRANSDUCTION	0.717099	0.481791	Not
GOBP_CELL_CELL_SIGNALING	1.84509	0.081842	Not
GOBP_NEUROTRANSMITTER_SECRETION	0.664245	0.514216	Not
GOBP_NEURON_NEURON_SYNAPTIC_TRANSMISSION	-1.31489	0.203614	Not
GOBP_SYNAPTIC_TRANSMISSION_CHOLINERGIC	0.861246	0.400943	Not
GOBP_ENSHEATHMENT_OF_NEURONS	2.01345	0.057766	Not
GOBP_NEUROMUSCULAR_SYNAPTIC_TRANSMISSION	0.674571	0.512252	Not
GOBP_GERM_CELL_DEVELOPMENT	-0.635976	0.533328	Not
GOBP_SPERM_AXONEME_ASSEMBLY	-0.982583	0.340289	Not
GOBP_SPERMATID_NUCLEUS_DIFFERENTIATION	-1.60066	0.125307	Not
GOBP_FEMALE_GAMETE_GENERATION	-0.0610423	0.952021	Not
GOBP_OOCYTE_CONSTRUCTION	0.00526178	0.995854	Not
GOBP_INSEMINATION	1.66695	0.1184	Not
GOBP_SINGLE_FERTILIZATION	0.320988	0.753546	Not
GOBP_BINDING_OF_SPERM_TO_ZONA_PELLUCIDA	-1.76522	0.0937097	Not
GOBP_ACROSOME_REACTION	0.814972	0.424432	Not
GOBP_PENETRATION_OF_ZONA_PELLUCIDA	-0.0465777	0.96342	Not
GOBP_FUSION_OF_SPERM_TO_EGG_PLASMA_MEMBRANE_INVOLVED_IN_SINGLE_FERTILIZATION	-0.0858328	0.932416	Not
GOBP_EGG_ACTIVATION	0.326491	0.747346	Not
GOBP_REGULATION_OF_MITOTIC_CELL_CYCLE	-1.82399	0.0902999	Not
GOBP_BLASTODERM_SEGMENTATION	2.07243	0.0516335	Not
GOBP_TRIPARTITE_REGIONAL_SUBDIVISION	2.06082	0.0524945	Not
GOBP_ZYGOTIC_DETERMINATION_OF_ANTERIOR_POSTERIOR_AXIS_EMBRYO	0.0848341	0.933211	Not
GOBP_THORAX_AND_ANTERIOR_ABDOMEN_DETERMINATION	-1.27033	0.219746	Not
GOBP_GASTRULATION	1.82212	0.0929497	Not
GOBP_SEGMENT_SPECIFICATION	0.738884	0.468356	Not
GOBP_COMPARTMENT_PATTERN_SPECIFICATION	1.98531	0.0685008	Not
GOBP_PATTERN_SPECIFICATION_PROCESS	3.52324	0.00238384	Up
GOBP_ECTODERM_DEVELOPMENT	-0.244448	0.81062	Not
GOBP_NEUROBLAST_PROLIFERATION	-0.145134	0.886745	Not
GOBP_NEGATIVE_REGULATION_OF_NEUROBLAST_PROLIFERATION	-0.731175	0.473048	Not
GOBP_AXONAL_FASCICULATION	1.6066	0.127001	Not
GOBP_SYNAPSE_ASSEMBLY	2.65713	0.0206335	Up
GOBP_CENTRAL_NERVOUS_SYSTEM_DEVELOPMENT	2.48765	0.0261384	Up
GOBP_VENTRAL_MIDLINE_DEVELOPMENT	2.62568	0.0167034	Up
GOBP_PERIPHERAL_NERVOUS_SYSTEM_DEVELOPMENT	3.2924	0.00409689	Up
GOBP_SENSORY_ORGAN_DEVELOPMENT	3.21868	0.00439572	Up
GOBP_SALIVARY_GLAND_DEVELOPMENT	1.96998	0.0639024	Not
GOBP_FOREGUT_MORPHOGENESIS	1.4821	0.158685	Not
GOBP_ENDODERM_DEVELOPMENT	1.39917	0.18326	Not
GOBP_MIDGUT_DEVELOPMENT	1.01078	0.324542	Not
GOBP_MESODERM_DEVELOPMENT	1.94782	0.07055	Not
GOBP_MESODERMAL_CELL_FATE_SPECIFICATION	-0.864383	0.399264	Not
GOBP_GONADAL_MESODERM_DEVELOPMENT	0.0322975	0.974585	Not
GOBP_HEART_DEVELOPMENT	3.57615	0.00195754	Up
GOBP_ADULT_HEART_DEVELOPMENT	-0.137591	0.892417	Not
GOBP_MUSCLE_ORGAN_DEVELOPMENT	1.74688	0.0984962	Not
GOBP_MYOBLAST_FUSION	1.95533	0.0663219	Not
GOBP_NEUROMUSCULAR_JUNCTION_DEVELOPMENT	2.50987	0.0235841	Up
GOBP_SEX_DETERMINATION	2.18636	0.0407722	Up
GOBP_SEX_DIFFERENTIATION	0.519913	0.608563	Not
GOBP_DOSAGE_COMPENSATION	0.462013	0.649067	Not
GOBP_EMBRYO_IMPLANTATION	0.353225	0.728775	Not
GOBP_PARTURITION	0.144297	0.886654	Not
GOBP_AGING	0.291058	0.773864	Not
GOBP_RESPONSE_TO_NUTRIENT	0.226235	0.823443	Not
GOBP_RESPIRATORY_GASEOUS_EXCHANGE_BY_RESPIRATORY_SYSTEM	0.439722	0.664711	Not
GOBP_DIGESTION	0.657007	0.523398	Not
GOBP_EXCRETION	0.58392	0.56917	Not
GOBP_BODY_FLUID_SECRETION	1.45237	0.165344	Not
GOBP_LACTATION	2.02206	0.057205	Not
GOBP_BLOOD_COAGULATION_INTRINSIC_PATHWAY	0.129747	0.898447	Not
GOBP_HEMOSTASIS	0.525705	0.604839	Not
GOBP_SENSORY_PERCEPTION	2.11566	0.0475822	Up
GOBP_PHOTOTRANSDUCTION	0.784377	0.442046	Not
GOBP_PHOTOTRANSDUCTION_VISIBLE_LIGHT	0.763883	0.453819	Not
GOBP_SENSORY_PERCEPTION_OF_CHEMICAL_STIMULUS	1.67656	0.115565	Not
GOBP_SENSORY_PERCEPTION_OF_SMELL	0.464086	0.648969	Not
GOBP_BEHAVIOR	2.32388	0.0400076	Up
GOBP_LEARNING	0.57569	0.573574	Not
GOBP_MEMORY	1.19577	0.245138	Not
GOBP_SHORT_TERM_MEMORY	1.40509	0.174796	Not
GOBP_LONG_TERM_MEMORY	2.97655	0.00728926	Up
GOBP_MATING_BEHAVIOR	0.628176	0.540673	Not
GOBP_COPULATION	0.290126	0.776094	Not
GOBP_RHYTHMIC_BEHAVIOR	0.777526	0.450533	Not
GOBP_CIRCADIAN_RHYTHM	0.253791	0.802758	Not
GOBP_GROOMING_BEHAVIOR	-0.586797	0.564807	Not
GOBP_LOCOMOTORY_BEHAVIOR	2.33845	0.0328645	Up
GOBP_FEEDING_BEHAVIOR	1.28774	0.216724	Not
GOBP_VISUAL_BEHAVIOR	-0.0754346	0.940783	Not
GOBP_CHEMOSENSORY_BEHAVIOR	1.5711	0.133167	Not
GOBP_MECHANOSENSORY_BEHAVIOR	-1.60177	0.124221	Not
GOBP_REGULATION_OF_HEART_CONTRACTION	1.6835	0.115403	Not
GOBP_TRNA_PROCESSING	-1.50568	0.147975	Not
GOBP_CELL_RECOGNITION	0.634715	0.532832	Not
GOBP_NEURON_RECOGNITION	2.63338	0.0169296	Up
GOBP_MOTOR_NEURON_AXON_GUIDANCE	1.70446	0.106054	Not
GOBP_MITOCHONDRIAL_FUSION	-2.1422	0.0466416	Down
GOBP_TOLL_SIGNALING_PATHWAY	-0.885537	0.387457	Not
GOBP_MESODERMAL_CELL_MIGRATION	0.408054	0.688812	Not
GOBP_AXO_DENDRITIC_TRANSPORT	-0.187598	0.854261	Not
GOBP_ANTEROGRADE_AXONAL_TRANSPORT	-0.071708	0.944162	Not
GOBP_RETROGRADE_AXONAL_TRANSPORT	-0.57718	0.571164	Not
GOBP_ACTIN_POLYMERIZATION_OR_DEPOLYMERIZATION	0.301539	0.765993	Not
GOBP_NEGATIVE_REGULATION_OF_DNA_REPLICATION	-1.32614	0.202695	Not
GOBP_STEROID_METABOLIC_PROCESS	2.31195	0.031193	Up
GOBP_BILE_ACID_METABOLIC_PROCESS	0.0821017	0.935355	Not
GOBP_C21_STEROID_HORMONE_METABOLIC_PROCESS	2.10184	0.0478844	Up
GOBP_ANDROGEN_METABOLIC_PROCESS	-0.546759	0.590623	Not
GOBP_ESTROGEN_METABOLIC_PROCESS	0.415376	0.682254	Not
GOBP_GLUCOCORTICOID_METABOLIC_PROCESS	2.86457	0.0102682	Up
GOBP_MINERALOCORTICOID_METABOLIC_PROCESS	2.52747	0.0200054	Up
GOBP_SPERMINE_METABOLIC_PROCESS	0.331021	0.74391	Not
GOBP_SPERMIDINE_METABOLIC_PROCESS	0.824996	0.419234	Not
GOBP_REGULATION_OF_BLOOD_PRESSURE	1.9194	0.070041	Not
GOBP_OPSONIZATION	0.368552	0.716887	Not
GOBP_SULFATE_TRANSPORT	-1.27524	0.219814	Not
GOBP_REGULATION_OF_G_PROTEIN_COUPLED_RECEPTOR_SIGNALING_PATHWAY	0.367406	0.717042	Not
GOBP_POSITIVE_REGULATION_OF_CELL_POPULATION_PROLIFERATION	-0.253243	0.802577	Not
GOBP_NEGATIVE_REGULATION_OF_CELL_POPULATION_PROLIFERATION	1.27891	0.215604	Not
GOBP_INSULIN_RECEPTOR_SIGNALING_PATHWAY	0.141715	0.888786	Not
GOBP_ACETYLCHOLINE_METABOLIC_PROCESS	0.110944	0.913112	Not
GOBP_INTRACELLULAR_MRNA_LOCALIZATION	1.20893	0.243868	Not
GOBP_ISOPRENOID_BIOSYNTHETIC_PROCESS	-0.485402	0.634128	Not
GOBP_ISOPRENOID_CATABOLIC_PROCESS	0.87035	0.394938	Not
GOBP_ASSOCIATIVE_LEARNING	0.535329	0.602246	Not
GOBP_G2_MI_TRANSITION_OF_MEIOTIC_CELL_CYCLE	-1.46914	0.164955	Not
GOBP_ENDOSOME_TO_LYSOSOME_TRANSPORT	-0.872275	0.396438	Not
GOBP_HISTONE_MRNA_METABOLIC_PROCESS	-3.10381	0.00557576	Down
GOBP_DETERMINATION_OF_ADULT_LIFESPAN	-0.565332	0.582607	Not
GOBP_ADULT_FEEDING_BEHAVIOR	-0.0582654	0.954131	Not
GOBP_ADULT_LOCOMOTORY_BEHAVIOR	1.4505	0.165466	Not
GOBP_GLIAL_CELL_MIGRATION	0.360388	0.722342	Not
GOBP_GERM_CELL_MIGRATION	-0.206214	0.839198	Not
GOBP_ASYMMETRIC_CELL_DIVISION	-1.25938	0.222558	Not
GOBP_REGULATION_OF_CELL_SHAPE	0.571166	0.57402	Not
GOBP_REGULATION_OF_CELL_SIZE	1.92603	0.0711665	Not
GOBP_RNA_SPLICING	-0.763182	0.454558	Not
GOBP_RESPIRATORY_CHAIN_COMPLEX_IV_ASSEMBLY	-2.29622	0.0378226	Down
GOBP_FIBROBLAST_GROWTH_FACTOR_RECEPTOR_SIGNALING_PATHWAY	0.462124	0.651688	Not
GOBP_EPIDERMIS_DEVELOPMENT	2.30214	0.0352337	Up
GOBP_REGULATION_OF_SMOOTHENED_SIGNALING_PATHWAY	1.33072	0.197695	Not
GOBP_REGULATION_OF_NOTCH_SIGNALING_PATHWAY	1.41455	0.176563	Not
GOBP_PHOTORECEPTOR_CELL_MORPHOGENESIS	0.571665	0.574966	Not
GOBP_ATTACHMENT_OF_SPINDLE_MICROTUBULES_TO_KINETOCHORE	-4.14925	0.00101281	Down
GOBP_LIPID_BIOSYNTHETIC_PROCESS	1.62352	0.1199	Not
GOBP_EXTRINSIC_APOPTOTIC_SIGNALING_PATHWAY_VIA_DEATH_DOMAIN_RECEPTORS	-0.835377	0.413865	Not
GOBP_INTRINSIC_APOPTOTIC_SIGNALING_PATHWAY_IN_RESPONSE_TO_OSMOTIC_STRESS	-0.795717	0.437408	Not
GOBP_INTRINSIC_APOPTOTIC_SIGNALING_PATHWAY_IN_RESPONSE_TO_DNA_DAMAGE	-0.237076	0.815946	Not
GOBP_INTRINSIC_APOPTOTIC_SIGNALING_PATHWAY_IN_RESPONSE_TO_OXIDATIVE_STRESS	-1.52399	0.143545	Not
GOBP_ACTIVATION_OF_CYSTEINE_TYPE_ENDOPEPTIDASE_ACTIVITY_INVOLVED_IN_APOPTOTIC_PROCESS_BY_CYTOCHROME_C	-1.92305	0.0790008	Not
GOBP_APOPTOTIC_MITOCHONDRIAL_CHANGES	-1.80167	0.0927015	Not
GOBP_CARBOHYDRATE_TRANSPORT	0.086741	0.931754	Not
GOBP_CELLULAR_AMINO_ACID_BIOSYNTHETIC_PROCESS	-0.938626	0.361945	Not
GOBP_PHOSPHOLIPID_BIOSYNTHETIC_PROCESS	0.485366	0.633072	Not
GOBP_PYRIMIDINE_CONTAINING_COMPOUND_SALVAGE	-0.926769	0.364933	Not
GOBP_PENTOSE_PHOSPHATE_SHUNT_NON_OXIDATIVE_BRANCH	-0.881772	0.38838	Not
GOBP_MACROMOLECULE_CATABOLIC_PROCESS	-0.0153827	0.987874	Not
GOBP_AEROBIC_RESPIRATION	-3.04037	0.00757349	Down
GOBP_FATTY_ACID_CATABOLIC_PROCESS	-0.0432202	0.966036	Not
GOBP_CELLULAR_AMINO_ACID_CATABOLIC_PROCESS	0.168286	0.869116	Not
GOBP_GLUTAMINE_FAMILY_AMINO_ACID_METABOLIC_PROCESS	1.27991	0.22036	Not
GOBP_GLUTAMINE_FAMILY_AMINO_ACID_CATABOLIC_PROCESS	1.06324	0.307061	Not
GOBP_ASPARTATE_FAMILY_AMINO_ACID_METABOLIC_PROCESS	-0.610755	0.549548	Not
GOBP_ASPARTATE_FAMILY_AMINO_ACID_BIOSYNTHETIC_PROCESS	-1.35097	0.191802	Not
GOBP_ASPARTATE_FAMILY_AMINO_ACID_CATABOLIC_PROCESS	1.30346	0.217994	Not
GOBP_SERINE_FAMILY_AMINO_ACID_METABOLIC_PROCESS	-0.334783	0.741284	Not
GOBP_SERINE_FAMILY_AMINO_ACID_BIOSYNTHETIC_PROCESS	-0.757152	0.458081	Not
GOBP_SERINE_FAMILY_AMINO_ACID_CATABOLIC_PROCESS	0.9508	0.3545	Not
GOBP_AROMATIC_AMINO_ACID_FAMILY_METABOLIC_PROCESS	-0.631569	0.537509	Not
GOBP_AROMATIC_AMINO_ACID_FAMILY_CATABOLIC_PROCESS	-1.23371	0.234802	Not
GOBP_BRANCHED_CHAIN_AMINO_ACID_METABOLIC_PROCESS	-0.847537	0.411275	Not
GOBP_BRANCHED_CHAIN_AMINO_ACID_BIOSYNTHETIC_PROCESS	-1.61414	0.127039	Not
GOBP_BRANCHED_CHAIN_AMINO_ACID_CATABOLIC_PROCESS	-0.74277	0.469588	Not
GOBP_GLUTAMINE_FAMILY_AMINO_ACID_BIOSYNTHETIC_PROCESS	1.10263	0.286432	Not
GOBP_METHIONINE_BIOSYNTHETIC_PROCESS	-1.86522	0.076849	Not
GOBP_HOMOSERINE_METABOLIC_PROCESS	2.49053	0.0212517	Up
GOBP_CYSTEINE_CATABOLIC_PROCESS	3.55339	0.0018902	Up
GOBP_GLYCOPROTEIN_METABOLIC_PROCESS	1.68519	0.110219	Not
GOBP_GLYCOPROTEIN_BIOSYNTHETIC_PROCESS	1.55321	0.139486	Not
GOBP_VITAMIN_BIOSYNTHETIC_PROCESS	-0.0565995	0.955414	Not
GOBP_VITAMIN_CATABOLIC_PROCESS	1.9664	0.0626157	Not
GOBP_NUCLEOBASE_METABOLIC_PROCESS	-0.443898	0.662837	Not
GOBP_PURINE_NUCLEOBASE_BIOSYNTHETIC_PROCESS	-1.54909	0.138681	Not
GOBP_NUCLEOSIDE_METABOLIC_PROCESS	-3.14861	0.00727914	Down
GOBP_RIBONUCLEOSIDE_METABOLIC_PROCESS	-1.83541	0.0918972	Not
GOBP_DEOXYRIBONUCLEOSIDE_METABOLIC_PROCESS	-0.97828	0.342094	Not
GOBP_NUCLEOSIDE_MONOPHOSPHATE_METABOLIC_PROCESS	-2.6397	0.015874	Down
GOBP_NUCLEOSIDE_MONOPHOSPHATE_BIOSYNTHETIC_PROCESS	-1.26115	0.22221	Not
GOBP_NUCLEOSIDE_MONOPHOSPHATE_CATABOLIC_PROCESS	-2.14548	0.0488785	Down
GOBP_PURINE_NUCLEOSIDE_MONOPHOSPHATE_METABOLIC_PROCESS	-2.07574	0.0504455	Not
GOBP_PURINE_NUCLEOSIDE_MONOPHOSPHATE_BIOSYNTHETIC_PROCESS	-1.36219	0.187621	Not
GOBP_PURINE_NUCLEOSIDE_MONOPHOSPHATE_CATABOLIC_PROCESS	-1.75135	0.100304	Not
GOBP_PYRIMIDINE_NUCLEOSIDE_MONOPHOSPHATE_METABOLIC_PROCESS	-0.816677	0.426262	Not
GOBP_PYRIMIDINE_NUCLEOSIDE_MONOPHOSPHATE_BIOSYNTHETIC_PROCESS	-0.655277	0.523582	Not
GOBP_PYRIMIDINE_NUCLEOSIDE_MONOPHOSPHATE_CATABOLIC_PROCESS	-0.998253	0.330565	Not
GOBP_NUCLEOSIDE_DIPHOSPHATE_METABOLIC_PROCESS	-0.399592	0.693788	Not
GOBP_NUCLEOSIDE_DIPHOSPHATE_BIOSYNTHETIC_PROCESS	-0.358851	0.723915	Not
GOBP_NUCLEOSIDE_DIPHOSPHATE_CATABOLIC_PROCESS	-0.148928	0.883048	Not
GOBP_PURINE_NUCLEOSIDE_DIPHOSPHATE_BIOSYNTHETIC_PROCESS	-0.153303	0.880625	Not
GOBP_PURINE_NUCLEOSIDE_DIPHOSPHATE_CATABOLIC_PROCESS	0.124857	0.902613	Not
GOBP_PYRIMIDINE_NUCLEOSIDE_DIPHOSPHATE_METABOLIC_PROCESS	0.318425	0.754231	Not
GOBP_PYRIMIDINE_NUCLEOSIDE_DIPHOSPHATE_BIOSYNTHETIC_PROCESS	-0.305847	0.76283	Not
GOBP_NUCLEOSIDE_TRIPHOSPHATE_METABOLIC_PROCESS	-1.63529	0.119292	Not
GOBP_NUCLEOSIDE_TRIPHOSPHATE_BIOSYNTHETIC_PROCESS	-2.44387	0.0278153	Down
GOBP_NUCLEOSIDE_TRIPHOSPHATE_CATABOLIC_PROCESS	-0.0989963	0.92219	Not
GOBP_PURINE_NUCLEOSIDE_TRIPHOSPHATE_CATABOLIC_PROCESS	-0.419172	0.679448	Not
GOBP_PYRIMIDINE_NUCLEOSIDE_TRIPHOSPHATE_METABOLIC_PROCESS	-3.09206	0.00651778	Down
GOBP_PYRIMIDINE_NUCLEOSIDE_TRIPHOSPHATE_BIOSYNTHETIC_PROCESS	-2.04787	0.0561875	Not
GOBP_PURINE_DEOXYRIBONUCLEOTIDE_METABOLIC_PROCESS	-1.63359	0.117307	Not
GOBP_PURINE_DEOXYRIBONUCLEOTIDE_BIOSYNTHETIC_PROCESS	-0.908188	0.374767	Not
GOBP_PURINE_DEOXYRIBONUCLEOTIDE_CATABOLIC_PROCESS	-1.78538	0.0893979	Not
GOBP_RIBONUCLEOSIDE_MONOPHOSPHATE_BIOSYNTHETIC_PROCESS	-1.96044	0.0633455	Not
GOBP_DEOXYRIBONUCLEOSIDE_MONOPHOSPHATE_BIOSYNTHETIC_PROCESS	0.40027	0.694594	Not
GOBP_RIBONUCLEOSIDE_MONOPHOSPHATE_CATABOLIC_PROCESS	-2.75408	0.0154229	Down
GOBP_DEOXYRIBONUCLEOSIDE_MONOPHOSPHATE_CATABOLIC_PROCESS	-2.30032	0.0322702	Down
GOBP_RIBONUCLEOSIDE_MONOPHOSPHATE_METABOLIC_PROCESS	-2.76229	0.0117068	Down
GOBP_DEOXYRIBONUCLEOSIDE_MONOPHOSPHATE_METABOLIC_PROCESS	-0.536014	0.602369	Not
GOBP_NUCLEOSIDE_CATABOLIC_PROCESS	-2.97581	0.00832294	Down
GOBP_PURINE_DEOXYRIBONUCLEOSIDE_MONOPHOSPHATE_METABOLIC_PROCESS	-1.25422	0.228852	Not
GOBP_PURINE_DEOXYRIBONUCLEOSIDE_MONOPHOSPHATE_CATABOLIC_PROCESS	-1.62883	0.120085	Not
GOBP_PYRIMIDINE_RIBONUCLEOSIDE_MONOPHOSPHATE_METABOLIC_PROCESS	-1.42151	0.171542	Not
GOBP_PYRIMIDINE_RIBONUCLEOSIDE_MONOPHOSPHATE_BIOSYNTHETIC_PROCESS	-1.48961	0.151458	Not
GOBP_PYRIMIDINE_DEOXYRIBONUCLEOSIDE_MONOPHOSPHATE_METABOLIC_PROCESS	-0.119912	0.906259	Not
GOBP_PYRIMIDINE_DEOXYRIBONUCLEOSIDE_MONOPHOSPHATE_BIOSYNTHETIC_PROCESS	0.944811	0.3628	Not
GOBP_RIBONUCLEOSIDE_DIPHOSPHATE_METABOLIC_PROCESS	0.165403	0.870295	Not
GOBP_DEOXYRIBONUCLEOSIDE_DIPHOSPHATE_METABOLIC_PROCESS	0.285283	0.778956	Not
GOBP_CYCLIC_NUCLEOTIDE_METABOLIC_PROCESS	1.4812	0.153979	Not
GOBP_RIBONUCLEOSIDE_DIPHOSPHATE_BIOSYNTHETIC_PROCESS	-0.503424	0.622141	Not
GOBP_CYCLIC_NUCLEOTIDE_BIOSYNTHETIC_PROCESS	1.83654	0.0857211	Not
GOBP_RIBONUCLEOSIDE_DIPHOSPHATE_CATABOLIC_PROCESS	-0.261295	0.797267	Not
GOBP_PYRIMIDINE_RIBONUCLEOSIDE_DIPHOSPHATE_METABOLIC_PROCESS	0.400206	0.694858	Not
GOBP_DEOXYRIBONUCLEOSIDE_TRIPHOSPHATE_METABOLIC_PROCESS	-0.728126	0.475852	Not
GOBP_PYRIMIDINE_RIBONUCLEOSIDE_TRIPHOSPHATE_METABOLIC_PROCESS	-2.99791	0.0072316	Down
GOBP_PYRIMIDINE_RIBONUCLEOSIDE_TRIPHOSPHATE_BIOSYNTHETIC_PROCESS	-1.44251	0.170949	Not
GOBP_PYRIMIDINE_DEOXYRIBONUCLEOSIDE_TRIPHOSPHATE_METABOLIC_PROCESS	-1.46997	0.156486	Not
GOBP_CYCLIC_NUCLEOTIDE_CATABOLIC_PROCESS	-1.21936	0.242765	Not
GOBP_PURINE_DEOXYRIBONUCLEOSIDE_TRIPHOSPHATE_METABOLIC_PROCESS	-1.6653	0.113318	Not
GOBP_PYRIMIDINE_RIBONUCLEOTIDE_METABOLIC_PROCESS	-3.09556	0.00683834	Down
GOBP_PYRIMIDINE_DEOXYRIBONUCLEOTIDE_METABOLIC_PROCESS	-2.63553	0.0182895	Down
GOBP_PYRIMIDINE_RIBONUCLEOTIDE_BIOSYNTHETIC_PROCESS	-2.6908	0.0150699	Down
GOBP_PYRIMIDINE_DEOXYRIBONUCLEOTIDE_BIOSYNTHETIC_PROCESS	-0.469182	0.644995	Not
GOBP_PYRIMIDINE_RIBONUCLEOTIDE_CATABOLIC_PROCESS	-0.80447	0.43068	Not
GOBP_NUCLEOTIDE_SUGAR_METABOLIC_PROCESS	0.0651878	0.948685	Not
GOBP_NUCLEOTIDE_SUGAR_BIOSYNTHETIC_PROCESS	-0.833094	0.415155	Not
GOBP_MENAQUINONE_METABOLIC_PROCESS	2.66636	0.0149863	Up
GOBP_COBALAMIN_METABOLIC_PROCESS	0.330569	0.745731	Not
GOBP_ISOPENTENYL_DIPHOSPHATE_BIOSYNTHETIC_PROCESS	0.248525	0.808215	Not
GOBP_GLYCOLIPID_BIOSYNTHETIC_PROCESS	1.22931	0.236292	Not
GOBP_PROTEIN_LIPOYLATION	-1.1424	0.26815	Not
GOBP_GLUCAN_BIOSYNTHETIC_PROCESS	-1.25307	0.232314	Not
GOBP_10_FORMYLTETRAHYDROFOLATE_METABOLIC_PROCESS	-1.89759	0.0743719	Not
GOBP_RIBONUCLEOTIDE_CATABOLIC_PROCESS	-1.96288	0.0660389	Not
GOBP_DEOXYRIBONUCLEOTIDE_METABOLIC_PROCESS	-2.98733	0.00717897	Down
GOBP_DEOXYRIBONUCLEOTIDE_BIOSYNTHETIC_PROCESS	-1.52103	0.143639	Not
GOBP_DEOXYRIBONUCLEOTIDE_CATABOLIC_PROCESS	-3.24531	0.00404555	Down
GOBP_RESPONSE_TO_TEMPERATURE_STIMULUS	-0.949083	0.355889	Not
GOBP_CELLULAR_RESPONSE_TO_STARVATION	1.34885	0.19409	Not
GOBP_RESPONSE_TO_PH	0.163647	0.871662	Not
GOBP_MRNA_TRANSCRIPTION	0.566918	0.576859	Not
GOBP_SNRNA_TRANSCRIPTION	-3.13836	0.00496373	Down
GOBP_RRNA_TRANSCRIPTION	0.0137025	0.989265	Not
GOBP_TRNA_TRANSCRIPTION	-0.11501	0.910064	Not
GOBP_AMINE_METABOLIC_PROCESS	0.0544403	0.957147	Not
GOBP_AMINE_BIOSYNTHETIC_PROCESS	-0.715952	0.4821	Not
GOBP_AMINE_CATABOLIC_PROCESS	0.82286	0.420759	Not
GOBP_OLIGOSACCHARIDE_METABOLIC_PROCESS	0.808933	0.429834	Not
GOBP_OLIGOSACCHARIDE_BIOSYNTHETIC_PROCESS	-0.741209	0.469603	Not
GOBP_OLIGOSACCHARIDE_CATABOLIC_PROCESS	1.60481	0.127768	Not
GOBP_RESPONSE_TO_RADIATION	-0.796546	0.438027	Not
GOBP_PHOSPHOLIPID_CATABOLIC_PROCESS	0.721039	0.480948	Not
GOBP_FOLIC_ACID_CONTAINING_COMPOUND_BIOSYNTHETIC_PROCESS	0.758629	0.457841	Not
GOBP_FOLIC_ACID_CONTAINING_COMPOUND_CATABOLIC_PROCESS	-1.5944	0.131137	Not
GOBP_TOXIN_METABOLIC_PROCESS	1.02105	0.323731	Not
GOBP_RESPONSE_TO_HEAT	-0.956535	0.350481	Not
GOBP_RESPONSE_TO_COLD	0.25888	0.799492	Not
GOBP_RESPONSE_TO_XENOBIOTIC_STIMULUS	0.817042	0.423732	Not
GOBP_RESPONSE_TO_UV	-1.00278	0.33234	Not
GOBP_RESPONSE_TO_WATER_DEPRIVATION	1.2374	0.232131	Not
GOBP_RESPONSE_TO_WATER	0.946462	0.355919	Not
GOBP_RESPONSE_TO_LIGHT_STIMULUS	0.150528	0.882309	Not
GOBP_CARNITINE_METABOLIC_PROCESS	0.578513	0.569576	Not
GOBP_METHYLGLYOXAL_METABOLIC_PROCESS	-1.33346	0.201598	Not
GOBP_PUTRESCINE_METABOLIC_PROCESS	1.63442	0.125873	Not
GOBP_PUTRESCINE_BIOSYNTHETIC_PROCESS	1.09157	0.292556	Not
GOBP_GAMMA_AMINOBUTYRIC_ACID_METABOLIC_PROCESS	-1.43101	0.171237	Not
GOBP_GAMMA_AMINOBUTYRIC_ACID_BIOSYNTHETIC_PROCESS	-1.07378	0.296814	Not
GOBP_RNA_MODIFICATION	-1.42511	0.170807	Not
GOBP_7_METHYLGUANOSINE_RNA_CAPPING	2.41969	0.0252664	Up
GOBP_FERTILIZATION	-0.0404838	0.96837	Not
GOBP_DETECTION_OF_ABIOTIC_STIMULUS	0.956855	0.354465	Not
GOBP_DETECTION_OF_LIGHT_STIMULUS	0.564072	0.580746	Not
GOBP_DETECTION_OF_VISIBLE_LIGHT	0.468772	0.644305	Not
GOBP_DETECTION_OF_CHEMICAL_STIMULUS	0.673047	0.512852	Not
GOBP_DETECTION_OF_BIOTIC_STIMULUS	-1.22599	0.234655	Not
GOBP_DETECTION_OF_VIRUS	-0.485144	0.63263	Not
GOBP_RESPONSE_TO_SYMBIONT	0.841978	0.409288	Not
GOBP_RESPONSE_TO_WOUNDING	0.910941	0.373268	Not
GOBP_RESPONSE_TO_MECHANICAL_STIMULUS	0.356753	0.724865	Not
GOBP_RESPONSE_TO_VIRUS	-0.781579	0.443193	Not
GOBP_RESPONSE_TO_BACTERIUM	-1.05202	0.305717	Not
GOBP_RESPONSE_TO_FUNGUS	-0.112547	0.91146	Not
GOBP_RESPONSE_TO_NEMATODE	-0.460285	0.65244	Not
GOBP_RESPONSE_TO_ABIOTIC_STIMULUS	0.294235	0.771592	Not
GOBP_RESPONSE_TO_GRAVITY	1.42984	0.167735	Not
GOBP_RESPONSE_TO_HERBICIDE	0.472706	0.643087	Not
GOBP_RESPONSE_TO_TOXIC_SUBSTANCE	-0.133452	0.895371	Not
GOBP_RESPONSE_TO_BLUE_LIGHT	-1.47083	0.168178	Not
GOBP_RESPONSE_TO_LIGHT_INTENSITY	1.1645	0.258182	Not
GOBP_PHOTOPERIODISM	0.292524	0.773757	Not
GOBP_ENTRAINMENT_OF_CIRCADIAN_CLOCK	0.352654	0.728777	Not
GOBP_UV_PROTECTION	-0.937192	0.364777	Not
GOBP_RESPONSE_TO_SALT_STRESS	1.7754	0.0904636	Not
GOBP_PHENYLPROPANOID_METABOLIC_PROCESS	0.718321	0.481329	Not
GOBP_CATECHOL_CONTAINING_COMPOUND_METABOLIC_PROCESS	-0.810973	0.427251	Not
GOBP_CATECHOL_CONTAINING_COMPOUND_BIOSYNTHETIC_PROCESS	-0.0512052	0.959671	Not
GOBP_RESPONSE_TO_ENDOGENOUS_STIMULUS	1.66792	0.112669	Not
GOBP_RESPONSE_TO_HORMONE	1.67773	0.110055	Not
GOBP_RESPONSE_TO_CARBOHYDRATE	1.302	0.207019	Not
GOBP_RESPONSE_TO_FRUCTOSE	0.0463996	0.963609	Not
GOBP_HORMONE_MEDIATED_SIGNALING_PATHWAY	1.80751	0.0952002	Not
GOBP_CARBOHYDRATE_MEDIATED_SIGNALING	1.48783	0.151831	Not
GOBP_REGULATION_OF_ASYMMETRIC_CELL_DIVISION	-1.5201	0.143512	Not
GOBP_EMBRYO_DEVELOPMENT	2.57935	0.0212715	Up
GOBP_POST_EMBRYONIC_DEVELOPMENT	1.15536	0.262149	Not
GOBP_EMBRYO_DEVELOPMENT_ENDING_IN_BIRTH_OR_EGG_HATCHING	2.61257	0.0195237	Up
GOBP_AXIS_SPECIFICATION	1.96478	0.0646357	Not
GOBP_SPECIFICATION_OF_SYMMETRY	2.20368	0.0390921	Up
GOBP_FLAVONOID_METABOLIC_PROCESS	-0.00826723	0.993507	Not
GOBP_ALKALOID_METABOLIC_PROCESS	1.74791	0.0994033	Not
GOBP_ABSCISSION	1.28822	0.213799	Not
GOBP_EMBRYONIC_PATTERN_SPECIFICATION	2.70951	0.013554	Up
GOBP_POST_EMBRYONIC_ANIMAL_MORPHOGENESIS	0.211753	0.834956	Not
GOBP_ANIMAL_ORGAN_MORPHOGENESIS	4.82813	0.000103469	Up
GOBP_TISSUE_DEVELOPMENT	2.51741	0.0212826	Up
GOBP_NEGATIVE_REGULATION_OF_BIOSYNTHETIC_PROCESS	1.5821	0.13007	Not
GOBP_REGULATION_OF_CATABOLIC_PROCESS	0.23462	0.817233	Not
GOBP_NEGATIVE_REGULATION_OF_CATABOLIC_PROCESS	0.803544	0.431959	Not
GOBP_POSITIVE_REGULATION_OF_CATABOLIC_PROCESS	0.474323	0.640565	Not
GOBP_EPIDERMAL_CELL_DIFFERENTIATION	1.591	0.128429	Not
GOBP_HORMONE_TRANSPORT	0.989199	0.335257	Not
GOBP_ANTERIOR_POSTERIOR_AXIS_SPECIFICATION	1.68948	0.117287	Not
GOBP_DORSAL_VENTRAL_AXIS_SPECIFICATION	0.488597	0.630195	Not
GOBP_ANTERIOR_POSTERIOR_PATTERN_SPECIFICATION	2.61138	0.0211377	Up
GOBP_DORSAL_VENTRAL_PATTERN_FORMATION	2.77155	0.0115587	Up
GOBP_PROXIMAL_DISTAL_PATTERN_FORMATION	1.3491	0.194072	Not
GOBP_CELL_CELL_RECOGNITION	0.00989678	0.99221	Not
GOBP_RESPONSE_TO_EXTRACELLULAR_STIMULUS	0.670886	0.510483	Not
GOBP_CELLULAR_WATER_HOMEOSTASIS	1.40849	0.173975	Not
GOBP_OOCYTE_DIFFERENTIATION	2.3284	0.0304789	Up
GOBP_NEGATIVE_REGULATION_OF_CELL_FATE_SPECIFICATION	0.0993096	0.92205	Not
GOBP_GLIAL_CELL_DIFFERENTIATION	0.695487	0.494417	Not
GOBP_CARDIOBLAST_DIFFERENTIATION	0.553818	0.587646	Not
GOBP_MEIOTIC_CHROMOSOME_CONDENSATION	-0.512146	0.614467	Not
GOBP_RESPONSE_TO_INORGANIC_SUBSTANCE	0.645663	0.525676	Not
GOBP_RESPONSE_TO_METAL_ION	0.0192232	0.984845	Not
GOBP_RESPONSE_TO_IRON_ION	-0.275662	0.786457	Not
GOBP_RESPONSE_TO_IRON_II_ION	-1.11776	0.284161	Not
GOBP_RESPONSE_TO_MANGANESE_ION	-0.0551369	0.956575	Not
GOBP_RESPONSE_TO_ZINC_ION	-1.03319	0.316804	Not
GOBP_SPECIFICATION_OF_ANIMAL_ORGAN_IDENTITY	1.08975	0.289251	Not
GOBP_REGULATION_OF_PROTON_TRANSPORT	-0.795592	0.435362	Not
GOBP_RESPONSE_TO_X_RAY	-0.411808	0.685829	Not
GOBP_BODY_MORPHOGENESIS	1.28034	0.224851	Not
GOBP_EMBRYONIC_BODY_MORPHOGENESIS	1.54579	0.145872	Not
GOBP_SUGAR_MEDIATED_SIGNALING_PATHWAY	2.02832	0.0554972	Not
GOBP_RESPONSE_TO_OZONE	0.305111	0.763755	Not
GOBP_RESPONSE_TO_IONIZING_RADIATION	-1.6202	0.121376	Not
GOBP_MAINTENANCE_OF_DNA_METHYLATION	0.167982	0.868423	Not
GOBP_RESPONSE_TO_UV_B	1.85029	0.0827287	Not
GOBP_RESPONSE_TO_UV_C	-0.652813	0.522499	Not
GOBP_RESPONSE_TO_LITHIUM_ION	1.25154	0.226267	Not
GOBP_VASCULAR_TRANSPORT	3.1824	0.00450828	Up
GOBP_ESTABLISHMENT_OR_MAINTENANCE_OF_TRANSMEMBRANE_ELECTROCHEMICAL_GRADIENT	1.72436	0.10284	Not
GOBP_ENDOMEMBRANE_SYSTEM_ORGANIZATION	-0.432733	0.669763	Not
GOBP_NADH_DEHYDROGENASE_COMPLEX_ASSEMBLY	-2.65332	0.0181676	Down
GOBP_MULTICELLULAR_ORGANISM_AGING	2.1668	0.0444586	Up
GOBP_RESPONSE_TO_SELENIUM_ION	-1.24244	0.236455	Not
GOBP_DETOXIFICATION_OF_COPPER_ION	-1.57495	0.134384	Not
GOBP_HEAT_ACCLIMATION	-2.47974	0.0219276	Down
GOBP_RESPONSE_TO_LEAD_ION	-2.04149	0.0593189	Not
GOBP_REGULATION_OF_HYDROGEN_PEROXIDE_METABOLIC_PROCESS	1.21947	0.238541	Not
GOBP_MEMBRANE_INVAGINATION	-2.03552	0.0559037	Not
GOBP_RESPONSE_TO_GAMMA_RADIATION	0.0839865	0.933863	Not
GOBP_REGULATION_OF_ANION_CHANNEL_ACTIVITY	2.45641	0.023322	Up
GOBP_COP9_SIGNALOSOME_ASSEMBLY	-0.593699	0.560419	Not
GOBP_HISTONE_MONOUBIQUITINATION	-1.91723	0.0704194	Not
GOBP_FATTY_ACID_OMEGA_OXIDATION	0.551255	0.588127	Not
GOBP_RESPONSE_TO_ACIDIC_PH	0.551102	0.587596	Not
GOBP_HISTONE_H3_K36_METHYLATION	-0.473952	0.642094	Not
GOBP_REGULATION_OF_CELL_FATE_COMMITMENT	2.05399	0.0555996	Not
GOBP_NEGATIVE_REGULATION_OF_CELL_FATE_COMMITMENT	0.0141771	0.98883	Not
GOBP_POSITIVE_REGULATION_OF_CELL_FATE_COMMITMENT	-0.104526	0.918218	Not
GOBP_CENTRIOLE_CENTRIOLE_COHESION	0.187936	0.852794	Not
GOBP_EXIT_FROM_MITOSIS	-2.49457	0.0235485	Down
GOBP_NEGATIVE_REGULATION_OF_HEART_RATE	-0.257224	0.799511	Not
GOBP_POSITIVE_REGULATION_OF_HEART_RATE	-0.607217	0.550256	Not
GOBP_MESENCHYMAL_CELL_PROLIFERATION	4.10331	0.000508038	Up
GOBP_REGULATION_OF_MESENCHYMAL_CELL_PROLIFERATION	3.37734	0.00309258	Up
GOBP_NEGATIVE_REGULATION_OF_PEPTIDASE_ACTIVITY	0.148335	0.883833	Not
GOBP_REGULATION_OF_SIGNALING_RECEPTOR_ACTIVITY	0.596494	0.55753	Not
GOBP_REGULATION_OF_GASTRULATION	2.56917	0.0252755	Up
GOBP_INTERCELLULAR_TRANSPORT	-0.366055	0.717997	Not
GOBP_PROTEASOMAL_PROTEIN_CATABOLIC_PROCESS	-0.329164	0.745464	Not
GOBP_RNA_SECONDARY_STRUCTURE_UNWINDING	-0.172338	0.865107	Not
GOBP_REGULATION_OF_AUTOPHAGY	0.621885	0.541375	Not
GOBP_NEGATIVE_REGULATION_OF_AUTOPHAGY	0.216118	0.831403	Not
GOBP_POSITIVE_REGULATION_OF_AUTOPHAGY	-0.231145	0.819439	Not
GOBP_REGULATION_OF_PHOSPHATIDYLINOSITOL_BIOSYNTHETIC_PROCESS	0.624966	0.539564	Not
GOBP_REGULATION_OF_PHOSPHOLIPASE_ACTIVITY	-0.885104	0.387494	Not
GOBP_POSITIVE_REGULATION_OF_PHOSPHOLIPASE_ACTIVITY	-0.824355	0.420692	Not
GOBP_NEGATIVE_REGULATION_OF_PHOSPHOLIPASE_ACTIVITY	-1.24826	0.229712	Not
GOBP_REGULATION_OF_CALCIUM_ION_TRANSPORT_INTO_CYTOSOL	0.848044	0.406421	Not
GOBP_POSITIVE_REGULATION_OF_CALCIUM_ION_TRANSPORT_INTO_CYTOSOL	0.630918	0.536028	Not
GOBP_REGULATION_OF_ACTIVATION_OF_JANUS_KINASE_ACTIVITY	-1.08539	0.292269	Not
GOBP_POSITIVE_REGULATION_OF_ACTIVATION_OF_JANUS_KINASE_ACTIVITY	-0.879673	0.390482	Not
GOBP_REGULATION_OF_PLATELET_ACTIVATION	0.510361	0.615387	Not
GOBP_NEGATIVE_REGULATION_OF_PLATELET_ACTIVATION	0.746331	0.465699	Not
GOBP_POSITIVE_REGULATION_OF_MACROMOLECULE_BIOSYNTHETIC_PROCESS	0.665141	0.514916	Not
GOBP_POSITIVE_REGULATION_OF_PHOSPHORUS_METABOLIC_PROCESS	0.230389	0.820199	Not
GOBP_NEGATIVE_REGULATION_OF_PHOSPHORUS_METABOLIC_PROCESS	-0.00426722	0.996636	Not
GOBP_REGULATION_OF_CELL_CYCLE_PROCESS	-1.73144	0.104364	Not
GOBP_REGULATION_OF_CELLULAR_KETONE_METABOLIC_PROCESS	-0.674767	0.510707	Not
GOBP_REGULATION_OF_KETONE_BIOSYNTHETIC_PROCESS	0.0815216	0.935867	Not
GOBP_REGULATION_OF_DOUBLE_STRAND_BREAK_REPAIR_VIA_HOMOLOGOUS_RECOMBINATION	-1.62553	0.123147	Not
GOBP_POSITIVE_REGULATION_OF_NUCLEAR_CELL_CYCLE_DNA_REPLICATION	-0.559851	0.582786	Not
GOBP_POSITIVE_REGULATION_OF_PLATELET_ACTIVATION	-0.734854	0.471225	Not
GOBP_VASCULAR_ENDOTHELIAL_GROWTH_FACTOR_PRODUCTION	-0.265712	0.793705	Not
GOBP_POSITIVE_REGULATION_OF_VASCULAR_ENDOTHELIAL_GROWTH_FACTOR_PRODUCTION	-0.0579501	0.954589	Not
GOBP_MIRNA_METABOLIC_PROCESS	1.65037	0.11488	Not
GOBP_MIRNA_CATABOLIC_PROCESS	1.60606	0.125577	Not
GOBP_REGULATION_OF_LAMELLIPODIUM_ASSEMBLY	-1.28978	0.214722	Not
GOBP_POSITIVE_REGULATION_OF_LAMELLIPODIUM_ASSEMBLY	-0.936443	0.364606	Not
GOBP_NEGATIVE_REGULATION_OF_LAMELLIPODIUM_ASSEMBLY	-0.224317	0.82517	Not
GOBP_REGULATION_OF_ENDOTHELIAL_CELL_MIGRATION	1.03713	0.312718	Not
GOBP_POSITIVE_REGULATION_OF_ENDOTHELIAL_CELL_MIGRATION	0.484386	0.63368	Not
GOBP_REGULATION_OF_CYTOPLASMIC_MRNA_PROCESSING_BODY_ASSEMBLY	-0.100644	0.920822	Not
GOBP_POSITIVE_REGULATION_OF_CYTOPLASMIC_MRNA_PROCESSING_BODY_ASSEMBLY	-0.67515	0.507037	Not
GOBP_POST_TRANSCRIPTIONAL_REGULATION_OF_GENE_EXPRESSION	-0.82743	0.420486	Not
GOBP_REGULATION_OF_CARDIAC_MUSCLE_ADAPTATION	0.522906	0.608723	Not
GOBP_POSITIVE_REGULATION_OF_CARDIAC_MUSCLE_ADAPTATION	-0.189582	0.852043	Not
GOBP_NEGATIVE_REGULATION_OF_CARDIAC_MUSCLE_ADAPTATION	1.07758	0.295799	Not
GOBP_PROGRAMMED_CELL_DEATH_INVOLVED_IN_CELL_DEVELOPMENT	-3.71396	0.00145146	Down
GOBP_NEGATIVE_REGULATION_OF_SCHWANN_CELL_PROLIFERATION	0.339464	0.738915	Not
GOBP_POSITIVE_REGULATION_OF_GENE_EXPRESSION	-0.0904014	0.928853	Not
GOBP_NEGATIVE_REGULATION_OF_GENE_EXPRESSION	0.31134	0.758658	Not
GOBP_REGULATION_OF_EPITHELIAL_CELL_MIGRATION	1.02771	0.316497	Not
GOBP_NEGATIVE_REGULATION_OF_EPITHELIAL_CELL_MIGRATION	0.582673	0.566447	Not
GOBP_POSITIVE_REGULATION_OF_EPITHELIAL_CELL_MIGRATION	0.724714	0.476781	Not
GOBP_REGULATION_OF_MITOCHONDRIAL_FUSION	-2.24198	0.0361845	Down
GOBP_NEGATIVE_REGULATION_OF_MITOCHONDRIAL_FUSION	-1.15895	0.262796	Not
GOBP_POSITIVE_REGULATION_OF_ORGANELLE_ORGANIZATION	-0.800757	0.435442	Not
GOBP_NEGATIVE_REGULATION_OF_ORGANELLE_ORGANIZATION	-1.33969	0.199879	Not
GOBP_REGULATION_OF_PLATELET_DERIVED_GROWTH_FACTOR_RECEPTOR_SIGNALING_PATHWAY	1.25351	0.228369	Not
GOBP_POSITIVE_REGULATION_OF_PLATELET_DERIVED_GROWTH_FACTOR_RECEPTOR_SIGNALING_PATHWAY	2.06348	0.0588804	Not
GOBP_NEGATIVE_REGULATION_OF_PLATELET_DERIVED_GROWTH_FACTOR_RECEPTOR_SIGNALING_PATHWAY	-0.325974	0.74856	Not
GOBP_CELL_COMMUNICATION_BY_ELECTRICAL_COUPLING	0.590383	0.562966	Not
GOBP_REGULATION_OF_CELL_COMMUNICATION_BY_ELECTRICAL_COUPLING	0.0906173	0.929245	Not
GOBP_NEGATIVE_REGULATION_OF_MUSCLE_CELL_APOPTOTIC_PROCESS	1.24361	0.231591	Not
GOBP_MUSCLE_CELL_APOPTOTIC_PROCESS	0.933873	0.361046	Not
GOBP_STRIATED_MUSCLE_CELL_APOPTOTIC_PROCESS	0.18868	0.852451	Not
GOBP_POSITIVE_REGULATION_OF_MUSCLE_CELL_APOPTOTIC_PROCESS	-0.270384	0.790196	Not
GOBP_POSITIVE_REGULATION_OF_STRIATED_MUSCLE_CELL_APOPTOTIC_PROCESS	-0.379272	0.709495	Not
GOBP_NEGATIVE_REGULATION_OF_STRIATED_MUSCLE_CELL_APOPTOTIC_PROCESS	0.231944	0.819602	Not
GOBP_ECTODERMAL_CELL_DIFFERENTIATION	-0.00498502	0.996089	Not
GOBP_EPITHELIAL_STRUCTURE_MAINTENANCE	1.09065	0.294076	Not
GOBP_REGULATION_OF_CELLULAR_CARBOHYDRATE_METABOLIC_PROCESS	0.779234	0.444569	Not
GOBP_POSITIVE_REGULATION_OF_CELLULAR_CARBOHYDRATE_METABOLIC_PROCESS	-0.663296	0.515288	Not
GOBP_REGULATION_OF_ALKALINE_PHOSPHATASE_ACTIVITY	0.213643	0.832983	Not
GOBP_POSITIVE_REGULATION_OF_ALKALINE_PHOSPHATASE_ACTIVITY	0.464042	0.648229	Not
GOBP_NEGATIVE_REGULATION_OF_NOREPINEPHRINE_SECRETION	1.07877	0.299682	Not
GOBP_GANGLIOSIDE_BIOSYNTHETIC_PROCESS_VIA_LACTOSYLCERAMIDE	1.66074	0.118148	Not
GOBP_REGULATION_OF_COLLAGEN_METABOLIC_PROCESS	2.14674	0.0468805	Up
GOBP_NEGATIVE_REGULATION_OF_COLLAGEN_METABOLIC_PROCESS	1.25144	0.224737	Not
GOBP_POSITIVE_REGULATION_OF_COLLAGEN_METABOLIC_PROCESS	1.81775	0.0874322	Not
GOBP_REGULATION_OF_EXTRACELLULAR_MATRIX_DISASSEMBLY	-0.279768	0.782394	Not
GOBP_NEGATIVE_REGULATION_OF_EXTRACELLULAR_MATRIX_DISASSEMBLY	0.704534	0.489194	Not
GOBP_REGULATION_OF_EPITHELIAL_TO_MESENCHYMAL_TRANSITION	2.0741	0.051197	Not
GOBP_POSITIVE_REGULATION_OF_EPITHELIAL_TO_MESENCHYMAL_TRANSITION	1.05551	0.305303	Not
GOBP_NEGATIVE_REGULATION_OF_EPITHELIAL_TO_MESENCHYMAL_TRANSITION	0.928596	0.365583	Not
GOBP_POSITIVE_REGULATION_OF_CELL_DEVELOPMENT	1.38165	0.181804	Not
GOBP_NEGATIVE_REGULATION_OF_CELL_DEVELOPMENT	1.89637	0.076527	Not
GOBP_POSITIVE_REGULATION_OF_HYDROGEN_PEROXIDE_METABOLIC_PROCESS	0.523156	0.606347	Not
GOBP_NEGATIVE_REGULATION_OF_HYDROGEN_PEROXIDE_METABOLIC_PROCESS	1.60884	0.122627	Not
GOBP_REGULATION_OF_HYDROGEN_PEROXIDE_BIOSYNTHETIC_PROCESS	1.67212	0.114436	Not
GOBP_PROTEIN_KINASE_A_SIGNALING	0.548589	0.590961	Not
GOBP_REGULATION_OF_PROTEIN_KINASE_A_SIGNALING	0.911669	0.374945	Not
GOBP_POSITIVE_REGULATION_OF_PROTEIN_KINASE_A_SIGNALING	0.713833	0.484077	Not
GOBP_REGULATION_OF_MACROPHAGE_DERIVED_FOAM_CELL_DIFFERENTIATION	0.0414841	0.967338	Not
GOBP_POSITIVE_REGULATION_OF_MACROPHAGE_DERIVED_FOAM_CELL_DIFFERENTIATION	-1.29683	0.21002	Not
GOBP_NEGATIVE_REGULATION_OF_MACROPHAGE_DERIVED_FOAM_CELL_DIFFERENTIATION	1.59072	0.12891	Not
GOBP_REGULATION_OF_LONG_CHAIN_FATTY_ACID_IMPORT_ACROSS_PLASMA_MEMBRANE	0.329021	0.745697	Not
GOBP_REGULATION_OF_NITRIC_OXIDE_MEDIATED_SIGNAL_TRANSDUCTION	1.27553	0.216181	Not
GOBP_POSITIVE_REGULATION_OF_NITRIC_OXIDE_MEDIATED_SIGNAL_TRANSDUCTION	0.625973	0.539275	Not
GOBP_REGULATION_OF_CGMP_MEDIATED_SIGNALING	0.0304118	0.976026	Not
GOBP_POSITIVE_REGULATION_OF_CGMP_MEDIATED_SIGNALING	1.2345	0.231713	Not
GOBP_NEGATIVE_REGULATION_OF_CGMP_MEDIATED_SIGNALING	-0.703899	0.491372	Not
GOBP_REGULATION_OF_PLASMINOGEN_ACTIVATION	0.215172	0.831982	Not
GOBP_POSITIVE_REGULATION_OF_PLASMINOGEN_ACTIVATION	-0.548517	0.59075	Not
GOBP_NEGATIVE_REGULATION_OF_PLASMINOGEN_ACTIVATION	1.1755	0.253239	Not
GOBP_REGULATION_OF_MACROPHAGE_CHEMOTAXIS	0.266289	0.792619	Not
GOBP_POSITIVE_REGULATION_OF_MACROPHAGE_CHEMOTAXIS	0.108124	0.914951	Not
GOBP_NEGATIVE_REGULATION_OF_MACROPHAGE_CHEMOTAXIS	-0.228618	0.821383	Not
GOBP_FIBROBLAST_MIGRATION	0.0261238	0.979412	Not
GOBP_REGULATION_OF_FIBROBLAST_MIGRATION	-0.220551	0.82758	Not
GOBP_POSITIVE_REGULATION_OF_FIBROBLAST_MIGRATION	-0.0776128	0.938875	Not
GOBP_NEGATIVE_REGULATION_OF_FIBROBLAST_MIGRATION	0.459579	0.651205	Not
GOBP_POSITIVE_REGULATION_OF_SODIUM_ION_TRANSPORT	1.65633	0.113257	Not
GOBP_NEGATIVE_REGULATION_OF_SODIUM_ION_TRANSPORT	2.74593	0.0133907	Up
GOBP_REGULATION_OF_CELL_MORPHOGENESIS_INVOLVED_IN_DIFFERENTIATION	0.205025	0.839535	Not
GOBP_POSITIVE_REGULATION_OF_CELL_MORPHOGENESIS_INVOLVED_IN_DIFFERENTIATION	0.377247	0.709866	Not
GOBP_NEGATIVE_REGULATION_OF_CELL_MORPHOGENESIS_INVOLVED_IN_DIFFERENTIATION	0.110916	0.912757	Not
GOBP_REGULATION_OF_MRNA_EXPORT_FROM_NUCLEUS	0.799923	0.4342	Not
GOBP_REGULATION_OF_PEPTIDYL_THREONINE_PHOSPHORYLATION	-0.292806	0.773164	Not
GOBP_POSITIVE_REGULATION_OF_PEPTIDYL_THREONINE_PHOSPHORYLATION	-1.10388	0.284472	Not
GOBP_NEGATIVE_REGULATION_OF_PEPTIDYL_THREONINE_PHOSPHORYLATION	-0.0525839	0.958673	Not
GOBP_REGULATION_OF_TUMOR_NECROSIS_FACTOR_MEDIATED_SIGNALING_PATHWAY	1.23961	0.233426	Not
GOBP_NEGATIVE_REGULATION_OF_TUMOR_NECROSIS_FACTOR_MEDIATED_SIGNALING_PATHWAY	1.10968	0.283475	Not
GOBP_REGULATION_OF_SYNAPTIC_VESICLE_PRIMING	2.57594	0.0181021	Up
GOBP_REGULATION_OF_CELL_SUBSTRATE_ADHESION	1.67322	0.109158	Not
GOBP_POSITIVE_REGULATION_OF_CELL_SUBSTRATE_ADHESION	2.49107	0.0211828	Up
GOBP_NEGATIVE_REGULATION_OF_CELL_SUBSTRATE_ADHESION	-0.03181	0.974962	Not
GOBP_BRADYKININ_CATABOLIC_PROCESS	-0.678724	0.507146	Not
GOBP_REGULATION_OF_HORMONE_LEVELS	1.29323	0.212434	Not
GOBP_T_CELL_CHEMOTAXIS	0.127829	0.899544	Not
GOBP_REGULATION_OF_T_CELL_CHEMOTAXIS	0.359637	0.723288	Not
GOBP_REGULATION_OF_MITOCHONDRION_ORGANIZATION	-0.370873	0.715056	Not
GOBP_POSITIVE_REGULATION_OF_MITOCHONDRION_ORGANIZATION	-1.23218	0.23545	Not
GOBP_NEGATIVE_REGULATION_OF_MITOCHONDRION_ORGANIZATION	-0.95772	0.351792	Not
GOBP_NEGATIVE_REGULATION_OF_CENTROSOME_DUPLICATION	0.572546	0.574	Not
GOBP_REGULATION_OF_GLUCOSE_TRANSMEMBRANE_TRANSPORT	-1.07081	0.304412	Not
GOBP_POSITIVE_REGULATION_OF_GLUCOSE_TRANSMEMBRANE_TRANSPORT	-1.51957	0.145081	Not
GOBP_NEGATIVE_REGULATION_OF_GLUCOSE_TRANSMEMBRANE_TRANSPORT	-0.0705904	0.944614	Not
GOBP_REGULATION_OF_MYOTUBE_DIFFERENTIATION	1.44088	0.166276	Not
GOBP_POSITIVE_REGULATION_OF_MYOTUBE_DIFFERENTIATION	-0.810023	0.430258	Not
GOBP_NEGATIVE_REGULATION_OF_MYOTUBE_DIFFERENTIATION	0.958963	0.350401	Not
GOBP_TELOMERE_MAINTENANCE_VIA_TELOMERE_LENGTHENING	-0.956046	0.351102	Not
GOBP_REGULATION_OF_PROTEIN_ADP_RIBOSYLATION	0.816915	0.423709	Not
GOBP_REGULATION_OF_KERATINOCYTE_PROLIFERATION	1.1247	0.280622	Not
GOBP_POSITIVE_REGULATION_OF_KERATINOCYTE_PROLIFERATION	1.44235	0.166207	Not
GOBP_NEGATIVE_REGULATION_OF_KERATINOCYTE_PROLIFERATION	0.0278406	0.978124	Not
GOBP_RETINA_LAYER_FORMATION	1.87829	0.078315	Not
GOBP_POSITIVE_REGULATION_OF_PATHWAY_RESTRICTED_SMAD_PROTEIN_PHOSPHORYLATION	1.40694	0.183174	Not
GOBP_REGULATION_OF_TRIGLYCERIDE_BIOSYNTHETIC_PROCESS	1.88672	0.0731238	Not
GOBP_POSITIVE_REGULATION_OF_TRIGLYCERIDE_BIOSYNTHETIC_PROCESS	1.03477	0.312996	Not
GOBP_NEGATIVE_REGULATION_OF_TRIGLYCERIDE_BIOSYNTHETIC_PROCESS	2.32779	0.0301139	Up
GOBP_REGULATION_OF_CHOLESTEROL_ESTERIFICATION	0.610289	0.548369	Not
GOBP_REGULATION_OF_CHOLESTEROL_EFFLUX	2.93925	0.00822447	Up
GOBP_POSITIVE_REGULATION_OF_CHOLESTEROL_EFFLUX	1.9181	0.068806	Not
GOBP_LIPID_LOCALIZATION	0.832734	0.414366	Not
GOBP_CHOLESTEROL_STORAGE	-1.0461	0.307435	Not
GOBP_REGULATION_OF_CARDIAC_MUSCLE_CONTRACTION_BY_REGULATION_OF_THE_RELEASE_OF_SEQUESTERED_CALCIUM_ION	-0.00996731	0.992169	Not
GOBP_REGULATION_OF_CARDIAC_MUSCLE_CONTRACTION_BY_CALCIUM_ION_SIGNALING	0.822724	0.421656	Not
GOBP_REGULATION_OF_LIPID_STORAGE	0.319211	0.752876	Not
GOBP_POSITIVE_REGULATION_OF_LIPID_STORAGE	0.911023	0.373381	Not
GOBP_POSITIVE_REGULATION_OF_CHOLESTEROL_STORAGE	-0.283158	0.780269	Not
GOBP_NEGATIVE_REGULATION_OF_CHOLESTEROL_STORAGE	-1.01033	0.324792	Not
GOBP_NEGATIVE_REGULATION_OF_LIPID_STORAGE	-0.326286	0.747762	Not
GOBP_REGULATION_OF_SEQUESTERING_OF_TRIGLYCERIDE	-0.126086	0.901103	Not
GOBP_POSITIVE_REGULATION_OF_SEQUESTERING_OF_TRIGLYCERIDE	0.500125	0.623404	Not
GOBP_NEGATIVE_REGULATION_OF_SEQUESTERING_OF_TRIGLYCERIDE	-1.10415	0.289755	Not
GOBP_POSITIVE_REGULATION_OF_STEROID_BIOSYNTHETIC_PROCESS	1.98174	0.060858	Not
GOBP_REGULATION_OF_TRIGLYCERIDE_CATABOLIC_PROCESS	0.222143	0.826421	Not
GOBP_NEGATIVE_REGULATION_OF_TRIGLYCERIDE_CATABOLIC_PROCESS	0.233376	0.817845	Not
GOBP_POSITIVE_REGULATION_OF_TRIGLYCERIDE_CATABOLIC_PROCESS	0.373039	0.715304	Not
GOBP_REGULATION_OF_VERY_LOW_DENSITY_LIPOPROTEIN_PARTICLE_REMODELING	1.26318	0.22843	Not
GOBP_REGULATION_OF_GLUCOSE_METABOLIC_PROCESS	1.13543	0.269418	Not
GOBP_POSITIVE_REGULATION_OF_GLUCOSE_METABOLIC_PROCESS	-0.436929	0.666824	Not
GOBP_REGULATION_OF_ISOMERASE_ACTIVITY	-2.76137	0.0120249	Down
GOBP_REGULATION_OF_VERY_LOW_DENSITY_LIPOPROTEIN_PARTICLE_CLEARANCE	0.593228	0.560658	Not
GOBP_POSITIVE_REGULATION_OF_MITOCHONDRIAL_MEMBRANE_POTENTIAL	-0.456769	0.653998	Not
GOBP_REGULATION_OF_INOSITOL_PHOSPHATE_BIOSYNTHETIC_PROCESS	-0.90011	0.380655	Not
GOBP_REGULATION_OF_PHOSPHATASE_ACTIVITY	-1.35818	0.188819	Not
GOBP_POSITIVE_REGULATION_OF_PHOSPHATASE_ACTIVITY	-1.46647	0.159086	Not
GOBP_NEGATIVE_REGULATION_OF_PHOSPHATASE_ACTIVITY	-1.49705	0.149389	Not
GOBP_CELLULAR_COMPONENT_ASSEMBLY_INVOLVED_IN_MORPHOGENESIS	-0.789304	0.440984	Not
GOBP_MACROPHAGE_CYTOKINE_PRODUCTION	-1.00372	0.327826	Not
GOBP_NEGATIVE_REGULATION_OF_MACROPHAGE_CYTOKINE_PRODUCTION	-0.934199	0.36087	Not
GOBP_REGULATION_OF_NECROTIC_CELL_DEATH	-1.28255	0.21894	Not
GOBP_POSITIVE_REGULATION_OF_NECROTIC_CELL_DEATH	0.379611	0.708678	Not
GOBP_REGULATION_OF_CELL_DEATH	-0.029793	0.976521	Not
GOBP_POSITIVE_REGULATION_OF_CELL_DEATH	0.067258	0.947049	Not
GOBP_NEGATIVE_REGULATION_OF_TRANSCRIPTION_BY_COMPETITIVE_PROMOTER_BINDING	1.63057	0.119988	Not
GOBP_NEGATIVE_REGULATION_OF_CELL_CYCLE_PROCESS	-2.24986	0.0395036	Down
GOBP_POSITIVE_REGULATION_OF_PEPTIDASE_ACTIVITY	-0.593344	0.559585	Not
GOBP_NEGATIVE_REGULATION_OF_VITAMIN_D_BIOSYNTHETIC_PROCESS	-0.233449	0.819431	Not
GOBP_REGULATION_OF_METAL_ION_TRANSPORT	1.09017	0.287993	Not
GOBP_MAGNESIUM_ION_HOMEOSTASIS	1.55824	0.135749	Not
GOBP_CELLULAR_MAGNESIUM_ION_HOMEOSTASIS	0.642198	0.52862	Not
GOBP_REGULATION_OF_GLUCAN_BIOSYNTHETIC_PROCESS	-0.682903	0.50237	Not
GOBP_REGULATION_OF_PHOSPHATE_TRANSPORT	0.427202	0.673651	Not
GOBP_REGULATION_OF_MICROTUBULE_NUCLEATION	-1.83942	0.0859771	Not
GOBP_TRANSPORT_ALONG_MICROTUBULE	-0.17353	0.864416	Not
GOBP_REGULATION_OF_NEURON_PROJECTION_DEVELOPMENT	1.61216	0.126719	Not
GOBP_POSITIVE_REGULATION_OF_NEURON_PROJECTION_DEVELOPMENT	0.096864	0.923866	Not
GOBP_NEGATIVE_REGULATION_OF_NEURON_PROJECTION_DEVELOPMENT	2.38963	0.0295426	Up
GOBP_REGULATION_OF_HIGH_DENSITY_LIPOPROTEIN_PARTICLE_CLEARANCE	-1.14647	0.264987	Not
GOBP_REGULATION_OF_LIPOPROTEIN_PARTICLE_CLEARANCE	2.29812	0.0338319	Up
GOBP_NEGATIVE_REGULATION_OF_LIPOPROTEIN_PARTICLE_CLEARANCE	2.47278	0.0246024	Up
GOBP_POSITIVE_REGULATION_OF_LIPOPROTEIN_PARTICLE_CLEARANCE	0.766974	0.453115	Not
GOBP_REGULATION_OF_LOW_DENSITY_LIPOPROTEIN_PARTICLE_CLEARANCE	1.75	0.0974219	Not
GOBP_NEGATIVE_REGULATION_OF_LOW_DENSITY_LIPOPROTEIN_PARTICLE_CLEARANCE	2.06035	0.056083	Not
GOBP_REGULATION_OF_SMAD_PROTEIN_COMPLEX_ASSEMBLY	1.24423	0.228385	Not
GOBP_NEGATIVE_REGULATION_OF_SMAD_PROTEIN_COMPLEX_ASSEMBLY	1.50524	0.152001	Not
GOBP_UBIQUITIN_RECYCLING	-1.46948	0.156568	Not
GOBP_FREE_UBIQUITIN_CHAIN_POLYMERIZATION	-1.47781	0.154301	Not
GOBP_RESPONSE_TO_AUDITORY_STIMULUS	-0.849381	0.405656	Not
GOBP_REGULATION_OF_TRANSLATIONAL_INITIATION_BY_EIF2_ALPHA_PHOSPHORYLATION	-0.298903	0.768459	Not
GOBP_ASTROCYTE_DEVELOPMENT	0.221089	0.827253	Not
GOBP_OLIGODENDROCYTE_DEVELOPMENT	0.114932	0.909618	Not
GOBP_MICROGLIA_DIFFERENTIATION	-0.814493	0.425144	Not
GOBP_GLIAL_CELL_PROLIFERATION	0.681583	0.503205	Not
GOBP_SCHWANN_CELL_PROLIFERATION	-0.0231359	0.981833	Not
GOBP_PERIPHERAL_NERVOUS_SYSTEM_AXON_REGENERATION	1.32897	0.19814	Not
GOBP_REGULATION_OF_GLIOGENESIS	-0.0145263	0.988548	Not
GOBP_NEGATIVE_REGULATION_OF_GLIOGENESIS	0.66048	0.516659	Not
GOBP_POSITIVE_REGULATION_OF_GLIOGENESIS	-0.0705369	0.944458	Not
GOBP_NEUROBLAST_DIFFERENTIATION	0.941738	0.360102	Not
GOBP_NEURAL_CREST_FORMATION	0.721102	0.478799	Not
GOBP_MESENCHYMAL_CELL_DEVELOPMENT	1.64634	0.114805	Not
GOBP_NEURAL_CREST_CELL_DIFFERENTIATION	2.85982	0.00972141	Up
GOBP_NEURAL_CREST_CELL_FATE_COMMITMENT	0.927689	0.36691	Not
GOBP_SCHWANN_CELL_DIFFERENTIATION	2.84055	0.0101798	Up
GOBP_REGULATION_OF_NEURON_MATURATION	-0.91395	0.372198	Not
GOBP_SCHWANN_CELL_DEVELOPMENT	3.83852	0.000955379	Up
GOBP_DOPAMINE_SECRETION	0.687914	0.499079	Not
GOBP_GLUTAMATE_SECRETION	1.00557	0.331162	Not
GOBP_REGULATION_OF_GLUTAMATE_SECRETION	0.782421	0.448147	Not
GOBP_POSITIVE_REGULATION_OF_GLUTAMATE_SECRETION	-0.23333	0.81869	Not
GOBP_NEGATIVE_REGULATION_OF_GLUTAMATE_SECRETION	0.245269	0.809534	Not
GOBP_GAMMA_AMINOBUTYRIC_ACID_SECRETION	0.88814	0.384781	Not
GOBP_REGULATION_OF_GAMMA_AMINOBUTYRIC_ACID_SECRETION	0.133764	0.894863	Not
GOBP_REGULATION_OF_EPINEPHRINE_SECRETION	1.66991	0.114164	Not
GOBP_REGULATION_OF_SEROTONIN_SECRETION	3.48924	0.0025041	Up
GOBP_NEGATIVE_REGULATION_OF_SEROTONIN_SECRETION	2.16704	0.0497649	Up
GOBP_PHOSPHATIDYLINOSITOL_3_KINASE_SIGNALING	0.509156	0.61601	Not
GOBP_REGULATION_OF_PHOSPHATIDYLINOSITOL_3_KINASE_SIGNALING	1.046	0.307455	Not
GOBP_NEGATIVE_REGULATION_OF_PHOSPHATIDYLINOSITOL_3_KINASE_SIGNALING	0.552025	0.5874	Not
GOBP_POSITIVE_REGULATION_OF_PHOSPHATIDYLINOSITOL_3_KINASE_SIGNALING	1.27249	0.217109	Not
GOBP_RESPONSE_TO_ORGANIC_CYCLIC_COMPOUND	0.50451	0.619797	Not
GOBP_RESPONSE_TO_ISOQUINOLINE_ALKALOID	-1.1931	0.249766	Not
GOBP_RESPONSE_TO_PURINE_CONTAINING_COMPOUND	0.606219	0.551919	Not
GOBP_RESPONSE_TO_AMINE	-0.711599	0.484769	Not
GOBP_STRIATED_MUSCLE_TISSUE_DEVELOPMENT	0.164559	0.870873	Not
GOBP_SKELETAL_MUSCLE_SATELLITE_CELL_ACTIVATION	0.931638	0.362788	Not
GOBP_REGULATION_OF_SKELETAL_MUSCLE_CONTRACTION_BY_CALCIUM_ION_SIGNALING	0.880944	0.390817	Not
GOBP_SKELETAL_MUSCLE_ATROPHY	-0.469143	0.644488	Not
GOBP_REGULATION_OF_SKELETAL_MUSCLE_ADAPTATION	1.45847	0.159731	Not
GOBP_NEGATIVE_REGULATION_OF_MUSCLE_HYPERTROPHY	0.199513	0.843811	Not
GOBP_POSITIVE_REGULATION_OF_MUSCLE_HYPERTROPHY	-1.13404	0.271067	Not
GOBP_REGULATION_OF_MUSCLE_HYPERTROPHY	-0.621671	0.541122	Not
GOBP_POSITIVE_REGULATION_OF_MUSCLE_ADAPTATION	0.280748	0.78196	Not
GOBP_NEGATIVE_REGULATION_OF_MUSCLE_ADAPTATION	2.01961	0.0593433	Not
GOBP_SMOOTH_MUSCLE_ADAPTATION	-1.48514	0.1525	Not
GOBP_REGULATION_OF_SOMITOGENESIS	0.637537	0.533975	Not
GOBP_MUSCLE_CELL_MIGRATION	-0.566334	0.580691	Not
GOBP_SKELETAL_MUSCLE_SATELLITE_CELL_DIFFERENTIATION	1.46344	0.160762	Not
GOBP_REGULATION_OF_SKELETAL_MUSCLE_CONTRACTION	0.731678	0.47359	Not
GOBP_TONIC_SMOOTH_MUSCLE_CONTRACTION	1.50973	0.149345	Not
GOBP_PHASIC_SMOOTH_MUSCLE_CONTRACTION	-0.396506	0.696723	Not
GOBP_RESPONSE_TO_ACTIVITY	-1.75828	0.0993899	Not
GOBP_INTESTINE_SMOOTH_MUSCLE_CONTRACTION	-0.0098591	0.992267	Not
GOBP_VASCULAR_ASSOCIATED_SMOOTH_MUSCLE_CONTRACTION	0.976876	0.344411	Not
GOBP_GASTRO_INTESTINAL_SYSTEM_SMOOTH_MUSCLE_CONTRACTION	-0.46093	0.652468	Not
GOBP_URINARY_BLADDER_SMOOTH_MUSCLE_CONTRACTION	0.714751	0.484459	Not
GOBP_SKELETAL_MUSCLE_SATELLITE_CELL_MAINTENANCE_INVOLVED_IN_SKELETAL_MUSCLE_REGENERATION	0.204301	0.840805	Not
GOBP_SKELETAL_MUSCLE_SATELLITE_CELL_PROLIFERATION	0.270839	0.789736	Not
GOBP_URINARY_TRACT_SMOOTH_MUSCLE_CONTRACTION	0.437845	0.668005	Not
GOBP_RESPONSE_TO_MUSCLE_ACTIVITY	-1.37282	0.187562	Not
GOBP_RESPONSE_TO_INACTIVITY	-0.304126	0.764087	Not
GOBP_STRIATED_MUSCLE_CELL_PROLIFERATION	-0.722397	0.485689	Not
GOBP_SKELETAL_MUSCLE_CELL_PROLIFERATION	0.726707	0.477237	Not
GOBP_REGULATION_OF_SKELETAL_MUSCLE_CELL_PROLIFERATION	0.98434	0.338796	Not
GOBP_NEGATIVE_REGULATION_OF_SKELETAL_MUSCLE_CELL_PROLIFERATION	1.10281	0.284583	Not
GOBP_SKELETAL_MYOFIBRIL_ASSEMBLY	0.316951	0.754756	Not
GOBP_RESPONSE_TO_MUSCLE_INACTIVITY	0.465527	0.646562	Not
GOBP_RESPONSE_TO_STIMULUS_INVOLVED_IN_REGULATION_OF_MUSCLE_ADAPTATION	0.444357	0.662413	Not
GOBP_TRANSITION_BETWEEN_FAST_AND_SLOW_FIBER	-0.44368	0.662688	Not
GOBP_STRIATED_MUSCLE_ADAPTATION	1.85531	0.0783573	Not
GOBP_MUSCLE_ATROPHY	0.413509	0.686197	Not
GOBP_STRIATED_MUSCLE_ATROPHY	0.0266879	0.979057	Not
GOBP_MUSCLE_HYPERTROPHY	-0.0540186	0.957439	Not
GOBP_SATELLITE_CELL_ACTIVATION_INVOLVED_IN_SKELETAL_MUSCLE_REGENERATION	-0.227485	0.822307	Not
GOBP_MYOTUBE_DIFFERENTIATION	2.32153	0.0304969	Up
GOBP_MYOTUBE_CELL_DEVELOPMENT	1.25128	0.231494	Not
GOBP_MYOBLAST_FUSION_INVOLVED_IN_SKELETAL_MUSCLE_REGENERATION	1.52667	0.142871	Not
GOBP_MYOTUBE_DIFFERENTIATION_INVOLVED_IN_SKELETAL_MUSCLE_REGENERATION	0.963345	0.352841	Not
GOBP_SMOOTH_MUSCLE_CELL_MIGRATION	-0.17409	0.863866	Not
GOBP_POSITIVE_REGULATION_OF_SMOOTH_MUSCLE_CELL_MIGRATION	-0.407398	0.688806	Not
GOBP_NEGATIVE_REGULATION_OF_SMOOTH_MUSCLE_CELL_MIGRATION	-0.614382	0.548353	Not
GOBP_REGULATION_OF_LUNG_BLOOD_PRESSURE	0.114209	0.910459	Not
GOBP_HEPARAN_SULFATE_PROTEOGLYCAN_BIOSYNTHETIC_PROCESS	0.811686	0.430376	Not
GOBP_HEPARAN_SULFATE_PROTEOGLYCAN_BIOSYNTHETIC_PROCESS_POLYSACCHARIDE_CHAIN_BIOSYNTHETIC_PROCESS	-0.236816	0.815979	Not
GOBP_HEPARAN_SULFATE_PROTEOGLYCAN_BIOSYNTHETIC_PROCESS_ENZYMATIC_MODIFICATION	-1.20853	0.250275	Not
GOBP_DNA_INTEGRATION	1.43712	0.166035	Not
GOBP_GAS_TRANSPORT	-0.324326	0.749306	Not
GOBP_CARBON_DIOXIDE_TRANSPORT	0.260029	0.797562	Not
GOBP_OXYGEN_TRANSPORT	-0.781977	0.446824	Not
GOBP_COPPER_ION_IMPORT	1.00154	0.334562	Not
GOBP_MAGNESIUM_ION_TRANSPORT	-0.541647	0.593889	Not
GOBP_ORGANIC_CATION_TRANSPORT	1.1084	0.282485	Not
GOBP_QUATERNARY_AMMONIUM_GROUP_TRANSPORT	1.49346	0.15145	Not
GOBP_INORGANIC_ANION_TRANSPORT	1.63416	0.11724	Not
GOBP_BICARBONATE_TRANSPORT	-0.783693	0.443995	Not
GOBP_IODIDE_TRANSPORT	-0.322532	0.750903	Not
GOBP_ORGANIC_ANION_TRANSPORT	1.12921	0.271627	Not
GOBP_HEXOSE_PHOSPHATE_TRANSPORT	2.45555	0.024035	Up
GOBP_MONOCARBOXYLIC_ACID_TRANSPORT	-0.176347	0.861731	Not
GOBP_BILE_ACID_AND_BILE_SALT_TRANSPORT	-0.970345	0.343367	Not
GOBP_OXALOACETATE_TRANSPORT	-1.16892e-05	0.999991	Not
GOBP_PROSTAGLANDIN_TRANSPORT	-0.731509	0.47281	Not
GOBP_TAURINE_TRANSPORT	0.707537	0.487914	Not
GOBP_SIALIC_ACID_TRANSPORT	0.759718	0.45854	Not
GOBP_C4_DICARBOXYLATE_TRANSPORT	1.44	0.164934	Not
GOBP_ALPHA_KETOGLUTARATE_TRANSPORT	1.51509	0.145978	Not
GOBP_CITRATE_TRANSPORT	4.82504	9.66043e-05	Up
GOBP_URATE_TRANSPORT	1.64256	0.11538	Not
GOBP_ORGANOPHOSPHATE_ESTER_TRANSPORT	1.34601	0.193379	Not
GOBP_FRUCTOSE_TRANSMEMBRANE_TRANSPORT	-1.62973	0.118069	Not
GOBP_GALACTOSE_TRANSMEMBRANE_TRANSPORT	-0.0607205	0.952382	Not
GOBP_NUCLEOTIDE_SUGAR_TRANSMEMBRANE_TRANSPORT	1.85735	0.0843474	Not
GOBP_POLYOL_TRANSMEMBRANE_TRANSPORT	-0.500518	0.622688	Not
GOBP_GLYCEROL_TRANSMEMBRANE_TRANSPORT	-0.884841	0.387386	Not
GOBP_ACIDIC_AMINO_ACID_TRANSPORT	1.14288	0.274463	Not
GOBP_AROMATIC_AMINO_ACID_TRANSPORT	0.437526	0.666203	Not
GOBP_BASIC_AMINO_ACID_TRANSPORT	0.0846302	0.933405	Not
GOBP_BRANCHED_CHAIN_AMINO_ACID_TRANSPORT	1.08762	0.290015	Not
GOBP_NEUTRAL_AMINO_ACID_TRANSPORT	0.206819	0.8387	Not
GOBP_L_ALANINE_TRANSPORT	0.449543	0.658526	Not
GOBP_ASPARTATE_TRANSMEMBRANE_TRANSPORT	0.773307	0.448736	Not
GOBP_L_CYSTINE_TRANSPORT	1.8939	0.0759779	Not
GOBP_GAMMA_AMINOBUTYRIC_ACID_TRANSPORT	1.07088	0.296474	Not
GOBP_L_GLUTAMATE_TRANSMEMBRANE_TRANSPORT	0.0489442	0.961583	Not
GOBP_GLYCINE_TRANSPORT	-1.86412	0.086713	Not
GOBP_LEUCINE_TRANSPORT	0.620385	0.542201	Not
GOBP_ORNITHINE_TRANSPORT	0.610336	0.552576	Not
GOBP_PROLINE_TRANSPORT	-0.0419514	0.967156	Not
GOBP_L_SERINE_TRANSPORT	1.38172	0.181595	Not
GOBP_TRYPTOPHAN_TRANSPORT	0.0514684	0.959503	Not
GOBP_PEPTIDE_TRANSPORT	1.85288	0.0795652	Not
GOBP_AMINE_TRANSPORT	0.169258	0.868314	Not
GOBP_AMINO_ACID_BETAINE_TRANSPORT	0.876337	0.391498	Not
GOBP_UREA_TRANSPORT	-1.03687	0.31234	Not
GOBP_MONOAMINE_TRANSPORT	2.35284	0.031037	Up
GOBP_POLYAMINE_TRANSPORT	-2.58063	0.0191377	Down
GOBP_ORGANIC_ACID_TRANSPORT	0.178902	0.860076	Not
GOBP_ORGANIC_HYDROXY_COMPOUND_TRANSPORT	1.59888	0.12491	Not
GOBP_NUCLEOBASE_TRANSPORT	-2.56129	0.0228168	Down
GOBP_ADENINE_TRANSPORT	-1.09805	0.291932	Not
GOBP_PYRIMIDINE_NUCLEOBASE_TRANSPORT	-2.95116	0.0103002	Down
GOBP_NUCLEOSIDE_TRANSPORT	-0.707006	0.491168	Not
GOBP_PYRIMIDINE_NUCLEOSIDE_TRANSPORT	-1.17529	0.256946	Not
GOBP_PURINE_NUCLEOTIDE_TRANSPORT	0.357687	0.724668	Not
GOBP_ADP_TRANSPORT	-0.368994	0.717145	Not
GOBP_ATP_TRANSPORT	0.137531	0.892021	Not
GOBP_ACETYLCHOLINE_TRANSPORT	-0.764573	0.455587	Not
GOBP_CHOLINE_TRANSPORT	0.399536	0.693853	Not
GOBP_DOPAMINE_TRANSPORT	0.970205	0.343316	Not
GOBP_NOREPINEPHRINE_TRANSPORT	1.61647	0.124303	Not
GOBP_CARNITINE_TRANSPORT	0.363466	0.720227	Not
GOBP_FOLIC_ACID_TRANSPORT	-0.224333	0.825181	Not
GOBP_HEME_TRANSPORT	2.58972	0.0184363	Up
GOBP_THIAMINE_TRANSPORT	-0.497574	0.624521	Not
GOBP_COBALAMIN_TRANSPORT	2.54578	0.0195976	Up
GOBP_FATTY_ACID_TRANSPORT	-0.220566	0.827769	Not
GOBP_LONG_CHAIN_FATTY_ACID_TRANSPORT	-0.177076	0.861575	Not
GOBP_LONG_CHAIN_FATTY_ACID_IMPORT_ACROSS_PLASMA_MEMBRANE	0.104478	0.917821	Not
GOBP_PHOSPHOLIPID_TRANSPORT	0.535451	0.59799	Not
GOBP_AMINOPHOSPHOLIPID_TRANSPORT	-0.59706	0.557015	Not
GOBP_STEROL_TRANSPORT	1.02858	0.315553	Not
GOBP_NUCLEOBASE_CONTAINING_COMPOUND_TRANSPORT	0.0746756	0.941357	Not
GOBP_COENZYME_A_METABOLIC_PROCESS	-3.48898	0.00235092	Down
GOBP_COENZYME_A_BIOSYNTHETIC_PROCESS	-2.34538	0.0294971	Down
GOBP_FORMATE_METABOLIC_PROCESS	-0.164955	0.870571	Not
GOBP_NUCLEOBASE_CONTAINING_SMALL_MOLECULE_INTERCONVERSION	-3.38686	0.00309824	Down
GOBP_DIADENOSINE_POLYPHOSPHATE_METABOLIC_PROCESS	-1.18915	0.249175	Not
GOBP_DIADENOSINE_POLYPHOSPHATE_CATABOLIC_PROCESS	-1.18915	0.249175	Not
GOBP_ENERGY_DERIVATION_BY_OXIDATION_OF_ORGANIC_COMPOUNDS	-2.58936	0.0197676	Down
GOBP_PROTON_MOTIVE_FORCE_DRIVEN_ATP_SYNTHESIS	-2.34513	0.0314471	Down
GOBP_VIRAL_PROCESS	-0.159999	0.874413	Not
GOBP_LIPID_CATABOLIC_PROCESS	1.00319	0.329884	Not
GOBP_DETECTION_OF_TEMPERATURE_STIMULUS	-0.407551	0.690726	Not
GOBP_CELL_GROWTH	1.18469	0.249794	Not
GOBP_VESICLE_ORGANIZATION	-1.38018	0.182237	Not
GOBP_CARBOHYDRATE_BIOSYNTHETIC_PROCESS	0.672947	0.508364	Not
GOBP_CARBOHYDRATE_CATABOLIC_PROCESS	0.268446	0.791617	Not
GOBP_ORGANIC_ACID_BIOSYNTHETIC_PROCESS	-0.290138	0.775457	Not
GOBP_ORGANIC_ACID_CATABOLIC_PROCESS	0.27074	0.790353	Not
GOBP_RHODOPSIN_MEDIATED_SIGNALING_PATHWAY	0.756504	0.458072	Not
GOBP_MRNA_METABOLIC_PROCESS	-1.29899	0.208717	Not
GOBP_RRNA_METABOLIC_PROCESS	-1.69804	0.107971	Not
GOBP_SNRNA_METABOLIC_PROCESS	-2.28905	0.0334363	Down
GOBP_SNO_S_RNA_METABOLIC_PROCESS	-1.12721	0.273538	Not
GOBP_RRNA_CATABOLIC_PROCESS	-0.663713	0.514328	Not
GOBP_SNRNA_CATABOLIC_PROCESS	-1.48393	0.154498	Not
GOBP_TRNA_CATABOLIC_PROCESS	0.193338	0.848882	Not
GOBP_SYNAPTIC_VESICLE_EXOCYTOSIS	0.948901	0.353879	Not
GOBP_SYNAPTIC_VESICLE_DOCKING	2.29778	0.0350918	Up
GOBP_SYNAPTIC_VESICLE_PRIMING	1.89864	0.0714673	Not
GOBP_POLYPRENOL_METABOLIC_PROCESS	2.23396	0.0367963	Up
GOBP_MONOTERPENOID_METABOLIC_PROCESS	0.601008	0.554471	Not
GOBP_DITERPENOID_BIOSYNTHETIC_PROCESS	-0.262553	0.795753	Not
GOBP_TERPENOID_BIOSYNTHETIC_PROCESS	-0.362123	0.721962	Not
GOBP_TERPENOID_CATABOLIC_PROCESS	1.28158	0.215685	Not
GOBP_STEROL_METABOLIC_PROCESS	1.98661	0.0607591	Not
GOBP_STEROL_BIOSYNTHETIC_PROCESS	1.3571	0.19222	Not
GOBP_GLYCOSIDE_METABOLIC_PROCESS	1.7283	0.106591	Not
GOBP_GLYCOSIDE_CATABOLIC_PROCESS	0.830597	0.418721	Not
GOBP_SNRNA_PROCESSING	-0.123673	0.902887	Not
GOBP_SYNAPTIC_VESICLE_COATING	-1.38091	0.185957	Not
GOBP_SYNAPTIC_VESICLE_MATURATION	-0.505981	0.618347	Not
GOBP_SYNAPTIC_VESICLE_UNCOATING	1.4849	0.153207	Not
GOBP_VESICLE_MEDIATED_TRANSPORT	0.306148	0.762513	Not
GOBP_ENDOSOMAL_TRANSPORT	-0.57337	0.57604	Not
GOBP_AXON_CHOICE_POINT_RECOGNITION	0.356776	0.725669	Not
GOBP_AXON_MIDLINE_CHOICE_POINT_RECOGNITION	0.0220629	0.982735	Not
GOBP_REGULATION_OF_STRIATED_MUSCLE_TISSUE_DEVELOPMENT	-0.926331	0.368825	Not
GOBP_IRON_SULFUR_CLUSTER_ASSEMBLY	-0.351204	0.729174	Not
GOBP_TELOMERE_CAPPING	-0.702168	0.492532	Not
GOBP_MACROAUTOPHAGY	-0.293219	0.773503	Not
GOBP_LYSOSOMAL_MICROAUTOPHAGY	1.85209	0.0872476	Not
GOBP_POSITIVE_REGULATION_OF_MACROAUTOPHAGY	-0.414152	0.683259	Not
GOBP_AUTOPHAGOSOME_MEMBRANE_DOCKING	-1.12155	0.275672	Not
GOBP_REGULATION_OF_MACROAUTOPHAGY	0.562206	0.580577	Not
GOBP_NEGATIVE_REGULATION_OF_MACROAUTOPHAGY	-0.455978	0.653952	Not
GOBP_PREASSEMBLY_OF_GPI_ANCHOR_IN_ER_MEMBRANE	-0.338667	0.739439	Not
GOBP_ATTACHMENT_OF_GPI_ANCHOR_TO_PROTEIN	1.5029	0.151811	Not
GOBP_GAP_JUNCTION_ASSEMBLY	0.667585	0.51385	Not
GOBP_O_GLYCAN_PROCESSING	2.09563	0.056115	Not
GOBP_PHOSPHORYLATION	0.156388	0.877251	Not
GOBP_DEPHOSPHORYLATION	-1.3371	0.195673	Not
GOBP_FEMALE_MEIOSIS_CHROMOSOME_SEGREGATION	-0.255968	0.801473	Not
GOBP_NEURON_REMODELING	1.07529	0.296331	Not
GOBP_MORPHOGENESIS_OF_EMBRYONIC_EPITHELIUM	3.30527	0.00395237	Up
GOBP_CALCIUM_INDEPENDENT_CELL_CELL_ADHESION_VIA_PLASMA_MEMBRANE_CELL_ADHESION_MOLECULES	1.58364	0.130316	Not
GOBP_CALCIUM_DEPENDENT_CELL_CELL_ADHESION_VIA_PLASMA_MEMBRANE_CELL_ADHESION_MOLECULES	0.813733	0.429981	Not
GOBP_DENDRITE_DEVELOPMENT	0.629566	0.539335	Not
GOBP_SOMATIC_DIVERSIFICATION_OF_IMMUNOGLOBULINS	-2.74645	0.012236	Down
GOBP_NEGATIVE_REGULATION_OF_TRANSCRIPTION_BY_RNA_POLYMERASE_I	-1.63539	0.11687	Not
GOBP_CYTOSOLIC_TRANSPORT	-0.988294	0.339776	Not
GOBP_PROTEIN_PROCESSING	0.00310692	0.997551	Not
GOBP_PROTEIN_AUTOPROCESSING	0.33237	0.743178	Not
GOBP_BASE_CONVERSION_OR_SUBSTITUTION_EDITING	0.0419295	0.967128	Not
GOBP_CYTIDINE_TO_URIDINE_EDITING	-0.00274241	0.997839	Not
GOBP_MRNA_MODIFICATION	-0.148575	0.883311	Not
GOBP_PROTEIN_IMPORT_INTO_PEROXISOME_MATRIX	-1.76214	0.0980297	Not
GOBP_PEROXISOME_FISSION	-0.758621	0.458011	Not
GOBP_HISTONE_MODIFICATION	0.630951	0.537041	Not
GOBP_HISTONE_METHYLATION	0.759224	0.456956	Not
GOBP_HISTONE_UBIQUITINATION	-2.48325	0.0222829	Down
GOBP_HISTONE_DEACETYLATION	0.905034	0.381509	Not
GOBP_HISTONE_DEUBIQUITINATION	-0.978772	0.349283	Not
GOBP_RAC_PROTEIN_SIGNAL_TRANSDUCTION	-1.14686	0.26493	Not
GOBP_PROTEIN_SUMOYLATION	1.06574	0.299606	Not
GOBP_PROTEIN_DESUMOYLATION	-1.05799	0.307343	Not
GOBP_POLY_A_PLUS_MRNA_EXPORT_FROM_NUCLEUS	-1.04794	0.316961	Not
GOBP_CYTOCHROME_COMPLEX_ASSEMBLY	-2.54428	0.0228159	Down
GOBP_PROTEIN_NITROSYLATION	0.46474	0.646906	Not
GOBP_PROTEIN_IMPORT	3.6498	0.00160642	Up
GOBP_RESPIRATORY_CHAIN_COMPLEX_III_ASSEMBLY	-0.286132	0.777753	Not
GOBP_RESPONSE_TO_INSECTICIDE	4.48825	0.00020287	Up
GOBP_PLASMA_MEMBRANE_PHOSPHOLIPID_SCRAMBLING	-0.68866	0.501354	Not
GOBP_STEM_CELL_DIVISION	0.515094	0.611872	Not
GOBP_CALCIUM_ION_REGULATED_EXOCYTOSIS	1.00426	0.326686	Not
GOBP_REGULATION_OF_EXOCYTOSIS	-0.735754	0.470029	Not
GOBP_REGULATION_OF_CALCIUM_ION_DEPENDENT_EXOCYTOSIS	1.30225	0.207614	Not
GOBP_PEPTIDYL_DIPHTHAMIDE_BIOSYNTHETIC_PROCESS_FROM_PEPTIDYL_HISTIDINE	-3.12382	0.00525552	Down
GOBP_PEPTIDYL_LYSINE_HYDROXYLATION	1.58909	0.126985	Not
GOBP_N_TERMINAL_PEPTIDYL_METHIONINE_ACETYLATION	0.763351	0.454899	Not
GOBP_PEPTIDYL_LYSINE_METHYLATION	0.449587	0.658665	Not
GOBP_PEPTIDYL_LYSINE_TRIMETHYLATION	-0.102132	0.91983	Not
GOBP_PEPTIDYL_LYSINE_MONOMETHYLATION	1.02914	0.315294	Not
GOBP_PEPTIDYL_LYSINE_DIMETHYLATION	1.75182	0.0956367	Not
GOBP_PEPTIDYL_LYSINE_OXIDATION	2.02226	0.0674483	Not
GOBP_PROTEIN_POLYGLUTAMYLATION	2.07692	0.0520653	Not
GOBP_PROTEIN_C_LINKED_GLYCOSYLATION	-0.248527	0.806992	Not
[truncated: 8,553 more rows]
